# Supplementary material
Source: PubMed Central journal article supplement (PMC2924746)
Supplement: NIHMS224529-supplement-1_si_001.pdf [file NIHMS224529-supplement-1_si_001.pdf]

# Enantioselective Synthesis of Axially Chiral Biaryls by the Pd-Catalyzed Suzuki-Miyaura Reaction: Substrate Scope and Quantum Mechanical Investigations

*Xiaoqiang Shen, Gavin O. Jones, Donald A. Watson, Brijesh Bhayana and Stephen L. Buchwald\**

Department of Chemistry, Room 18-490  
Massachusetts Institute of Technology  
Cambridge, MA 02139 (USA)  
FAX: (+1) 617-253-3297  
E-mail: [sbuchwal@mit.edu](mailto:sbuchwal@mit.edu)

## Supporting Information

**Part I. Complete citation for reference 71.**

**Part II. Experimental conditions and procedures.**

**Part III. Compound characterization data.**

**Part IV. Interconversion of intermediates formed after transmetalation.**

**Part V. Cartesian coordinates and energies for stationary points.**

**Part I. Complete citation for reference 71.**

Frisch, M. J.; Trucks, G. W.; Schlegel, H. B.; Scuseria, G. E.; Robb, M. A.; Cheeseman, J. R.; Montgomery, Jr., J. A.; Vreven, T.; Kudin, K. N.; Burant, J. C.; Millam, J. M.; Iyengar, S. S.; Tomasi, J.; Barone, V.; Mennucci, B.; Cossi, M.; Scalmani, G.; Rega, N.; Petersson, G. A.; Nakatsuji, H.; Hada, M.; Ehara, M.; Toyota, K.; Fukuda, R.; Hasegawa, J.; Ishida, M.; Nakajima, T.; Honda, Y.; Kitao, O.; Nakai, H.; Klene, M.; Li, X.; Knox, J. E.; Hratchian, H. P.; Cross, J. B.; Bakken, V.; Adamo, C.; Jaramillo, J.; Gomperts, R.; Stratmann, R. E.; Yazyev, O.; Austin, A. J.; Cammi, R.; Pomelli, C.; Ochterski, J. W.; Ayala, P. Y.; Morokuma, K.; Voth, G. A.; Salvador, P.; Dannenberg, J. J.; Zakrzewski, V. G.; Dapprich, S.; Daniels, A. D.; Strain, M. C.; Farkas, O.; Malick, D. K.; Rabuck, A.

D.; Raghavachari, K.; Foresman, J. B.; Ortiz, J. V.; Cui, Q.; Baboul, A. G.; Clifford, S.; Cioslowski, J.; Stefanov, B. B.; Liu, G.; Liashenko, A.; Piskorz, P.; Komaromi, I.; Martin, R. L.; Fox, D. J.; Keith, T.; Al-Laham, M. A.; Peng, C. Y.; Nanayakkara, A.; Challacombe, M.; Gill, P. M. W.; Johnson, B.; Chen, W.; Wong, M. W.; Gonzalez, C.; Pople, J. A. *Gaussian 03*, Revision E.01; Gaussian, Inc.: Wallingford CT, 2004.

## Part II. Experimental conditions and procedures.

### GENERAL CONSIDERATIONS

**Reagents.** Unless otherwise stated, all reactions were carried out in resealable screw-cap Schlenk tubes under an argon atmosphere using standard Schlenk techniques for the manipulation of solvents and reagents. Anhydrous solvents ( $\text{CH}_2\text{Cl}_2$ , THF, diethyl ether and toluene) were obtained by passage through successive alumina and Q5 reactant-packed columns on a solvent purification system.  $\text{Pd}_2(\text{dba})_3$  was purchased from Aldrich,  $\text{Pd}(\text{OAc})_2$  was a gift from BASF. All reagents were purchased from commercial sources and used as received. *o*-tolylboronic acid and 2-ethylphenylboronic acid were purchased from Alfa Aesar, 2-ethoxy-1-naphthaleneboronic acid was purchased from Aldrich. Cumyl amine was purchased from TCI. 2-methyl-1-naphthaleneboronic acid,<sup>1</sup> diphenyl (1-bromo-2-naphthyl)phosphonate,<sup>2</sup> (1-chloro-2-naphthyl)diisopropylphosphine oxide<sup>2</sup> were prepared according to the literature procedure. Flash chromatography was performed with EM Science silica gel 60 (230-400 mesh)<sup>3</sup> or using a Biotage SP4 instrument with prepacked silica cartridges.

**Analytical Methods.** All new compounds were characterized by  $^1\text{H}$  NMR,  $^{13}\text{C}$  NMR,  $^{19}\text{F}$  NMR (where applicable),  $^{31}\text{P}$  NMR (where applicable), IR spectroscopy and in most cases, elemental analysis.  $^1\text{H}$  NMR and  $^{13}\text{C}$  NMR spectra and melting points (where applicable) are included for all known compounds and for all new compounds not characterized by elemental analysis.  $^1\text{H}$  and  $^{13}\text{C}$  NMR spectra were recorded on a Varian 300 MHz or Bruker 400 MHz. Infrared spectra were recorded on a Perkin-Elmer Model 2000 FT-IR using NaCl plates (thin film). Optical rotations were measured on Jasco P-

1010 polarimeter with a sodium lamp (589 nm) at ambient temperature (21-22 °C) and are reported as follows:  $[\alpha]_{\lambda}$  (c g/100mL, the concentration of the samples is given in g 100 mL<sup>-1</sup>). Analytical high performance liquid chromatography (HPLC) was performed on a Agilent 1100 Series system equipped with a multiple wavelength UV detector (deuterium lamp, 190-600 nm) using a Daicel Chiralcel<sup>®</sup>, or Chiralpak<sup>®</sup> and HPLC-grade isopropanol and hexanes as the eluting solvents. Elemental analyses were performed by Atlantic Microlab Inc., Norcross, GA. All <sup>1</sup>H NMR spectra are reported in parts per million (ppm) downfield of TMS and were measured relative to the signals for CHCl<sub>3</sub> (7.27 ppm). All <sup>13</sup>C NMR spectra were reported in ppm relative to residual CHCl<sub>3</sub> (77 ppm) and were obtained with <sup>1</sup>H decoupling. Melting points were obtained on a Mel-Temp capillary melting point apparatus. Gas chromatographic analyses were performed on Hewlett-Packard 6890 gas chromatography instrument with a FID detector using 25m x 0.20 mm capillary column with cross-linked methyl siloxane as the stationary phase. The yields reported in tables 2 refer to isolated yields and represent an average of at least two independent runs. The pure compounds are estimated to be ≥ 95% pure as determined by <sup>1</sup>H NMR and GC analysis and/or combustion analysis.

### General Procedure for the Synthesis of Aryl Halides

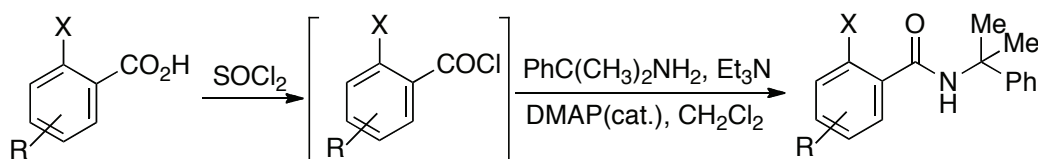

A mixture of ortho-halo acid (5.0 mmol) and SOCl<sub>2</sub> (8 mL) was heated to reflux for 3 h. The resulting mixture was then cooled down to room temperature and concentrated with the aid of a rotary evaporator. To the resulting residue, benzene (15 ml) was added and the resulting solution was concentrated with the aid of a rotary evaporator. Then the residue was dissolved in CH<sub>2</sub>Cl<sub>2</sub> (10 mL) and added to a solution containing cumyl amine (1.2 eq), Et<sub>3</sub>N (1.5 eq), DMAP (5%) and CH<sub>2</sub>Cl<sub>2</sub> (10 mL). The mixture was then stirred at room temperature for 2 h. The resulting mixture was diluted with ether (40 mL) and washed twice with 1N HCl (20 mL), twice with sat. NaHCO<sub>3</sub> and once with brine.

The organic layer was dried and concentrated in vacuo. The crude product was directly used for the Suzuki-Miyaura coupling process.

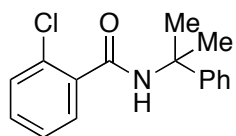

**2-chloro-N-(2-phenyl-2-propyl)benzamide** (Table 2, entry a) The title compound was obtained in 90% yield as a white solid from 2-chlorobenzoyl chloride and cumyl amine by using the general procedure. MP = 100.5-101.5 °C; IR (thin film): 3275, 1653, 1540  $\text{cm}^{-1}$ ;  $^1\text{H}$  NMR (400 MHz,  $\text{CDCl}_3$ )  $\delta$  7.58 (dd,  $J = 7.0, 1.6$  Hz, 1H), 7.47 (d,  $J = 7.6$  Hz, 2H), 7.35-7.23 (m, 6H), 6.51 (s, 1H), 1.79 (s, 6H);  $^{13}\text{C}$  NMR (100 MHz,  $\text{CDCl}_3$ )  $\delta$  165.2, 146.4, 135.8, 131.0, 130.3, 130.04, 130.00, 128.4, 127.0, 126.7, 124.8, 56.7, 29.0. Elemental analysis for  $\text{C}_{16}\text{H}_{16}\text{ClNO}$ : C, 70.20; H, 5.89. Found: C, 69.90; H, 5.79.

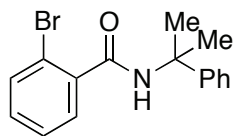

**2-bromo-N-(2-phenyl-2-propyl)benzamide** (Table 2, entry b) The title compound was obtained in 95% yield as a white solid from 2-bromobenzoyl chloride and cumyl amine by using the general procedure. MP = 115-116 °C; IR (thin film): 3276, 1653, 1540  $\text{cm}^{-1}$ ;  $^1\text{H}$  NMR (300 MHz,  $\text{CDCl}_3$ )  $\delta$  7.58-7.49 (m, 4H), 7.40-7.30 (m, 3H), 7.29-7.21 (m, 2H), 6.34 (s, 1H), 1.83 (s, 6H);  $^{13}\text{C}$  NMR (75 MHz,  $\text{CDCl}_3$ )  $\delta$  166.3, 146.4, 138.4, 133.2, 131.0, 129.5, 128.4, 127.5, 126.7, 124.8, 119.1, 56.8, 28.8. Elemental analysis for  $\text{C}_{16}\text{H}_{16}\text{BrNO}$ : C, 60.39; H, 5.07. Found: C, 60.21; H, 5.01.

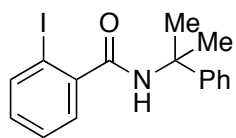

**2-iodo-N-(2-phenyl-2-propyl)benzamide** (Table 2, entry c) The title compound was obtained in 88% yield as a white solid from 2-iodobenzoyl chloride and cumyl amine by using the general procedure. MP = 135-136 °C; IR (thin film): 3246, 1655, 1548  $\text{cm}^{-1}$ ;  $^1\text{H}$  NMR (300 MHz,  $\text{CDCl}_3$ )  $\delta$  7.84 (d,  $J = 7.8$  Hz, 1H), 7.53 (d,  $J = 7.8$  Hz, 2H), 7.42-7.34 (m, 4H), 7.28-7.24 (m, 1H), 7.08 (t,  $J = 7.4$  Hz, 1H), 6.05 (s, 1H), 1.85 (s, 6H);  $^{13}\text{C}$  NMR (100 MHz,  $\text{CDCl}_3$ )  $\delta$  168.0, 146.4, 142.6, 139.7, 130.8, 128.3, 128.2, 128.1, 126.8, 124.8, 92.3, 56.7, 28.7. Elemental analysis for  $\text{C}_{16}\text{H}_{16}\text{INO}$ : C, 52.62; H, 4.42. Found: C, 52.88; H, 4.41.

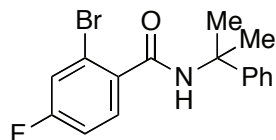

**2-bromo-4-fluoro-N-(2-phenyl-2-propyl)benzamide**(Table 2, entry f) The title compound was obtained in 83% yield as a white

solid from 2-bromo-4-fluorobenzoic acid by using the general procedure. MP = 100-100.5 °C; IR (thin film): 3231, 1648, 1597 cm<sup>-1</sup>; <sup>1</sup>H NMR (300 MHz, CDCl<sub>3</sub>) δ 7.50-7.45 (m, 3H), 7.39-7.32 (m, 2H), 7.30-7.23 (m, 2H), 7.02 (ddd, J = 8.7, 7.8, 2.4 Hz, 1H), 6.46 (s, 1H), 1.79 (s, 6H); <sup>13</sup>C NMR (75 MHz, CDCl<sub>3</sub>) δ 165.4, 162.5 (d, J = 252.5 Hz), 146.3, 134.6 (d, J = 3.8 Hz), 131.1 (d, J = 8.8 Hz), 128.3, 126.7, 124.8, 120.4 (d, J = 24.5 Hz), 119.7 (d, J = 9.5 Hz), 114.7 (d, J = 21.1 Hz), 56.8, 28.8. <sup>19</sup>F NMR (282 MHz, CDCl<sub>3</sub>) δ -108.9. Elemental analysis for C<sub>16</sub>H<sub>15</sub>BrFNO: C, 57.16; H, 4.50. Found: C, 57.29; H, 4.43.

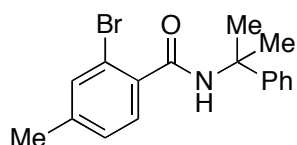

**2-bromo-4-methyl-N-(2-phenyl-2-propyl)benzamide** (Table

2, entry h) The title compound was obtained in 95% yield as a white solid from 2-bromo-4-methylbenzoic acid by using the general procedure. MP = 131-132 °C; IR (thin film): 3275, 1651, 1539 cm<sup>-1</sup>; <sup>1</sup>H NMR (400 MHz, CDCl<sub>3</sub>) δ 7.49-7.47 (m, 2H), 7.40 (d, J = 7.8 Hz, 1H), 7.36-7.31 (m, 3H), 7.25-7.20 (m, 1H), 7.10 (d, J = 7.8 Hz, 1H), 6.40 (s, 1H), 2.31 (s, 3H), 1.79 (s, 6H); <sup>13</sup>C NMR (100 MHz, CDCl<sub>3</sub>) δ 167.2, 146.4, 141.5, 135.3, 133.5, 129.6, 128.3, 128.2, 126.6, 124.8, 118.8, 56.6, 28.8, 20.8. Elemental analysis for C<sub>17</sub>H<sub>18</sub>BrNO: C, 61.46; H, 5.46. Found: C, 61.17; H, 5.42.

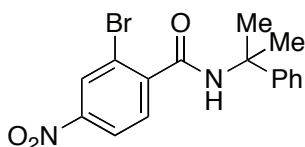

**2-bromo-4-nitro-N-(2-phenyl-2-propyl)benzamide** (Table 2,

entry j) The title compound was obtained in 93% yield as a white solid from 2-bromo-4-nitrobenzoic acid by using the general procedure. MP = 166-167 °C; IR (thin film): 3273, 1651, 1526 cm<sup>-1</sup>; <sup>1</sup>H NMR (400 MHz, CDCl<sub>3</sub>) δ 8.37 (d, J = 2.1 Hz, 1H), 8.12 (dd, J = 8.4, 2.2 Hz, 1H), 7.57 (d, J = 8.4 Hz, 1H), 7.46-7.43 (m, 2H), 7.36-7.31 (m, 2H), 7.26-7.22 (m, 1H), 6.33 (s, 1H), 1.79 (s, 6H); <sup>13</sup>C NMR (100 MHz, CDCl<sub>3</sub>) δ 164.6, 148.3, 145.8, 144.0, 130.0, 128.5, 128.3, 127.1, 124.8, 122.5, 119.8, 57.3, 28.7. Elemental analysis for C<sub>16</sub>H<sub>15</sub>BrN<sub>2</sub>O<sub>3</sub>: C, 52.91; H, 4.16. Found: C, 53.08; H, 4.01.

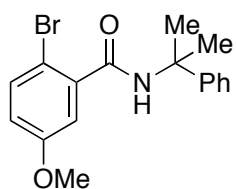

**2-bromo-5-methoxy-N-(2-phenyl-2-propyl)benzamide** (Table 2,

entry k) The title compound was obtained in 95% yield as a white solid from 2-bromo-5-methoxybenzoic acid by using the general procedure. MP = 111-112.5 °C; IR (thin film): 3279, 1653, 1540 cm<sup>-1</sup>

<sup>1</sup>H NMR (300 MHz, CDCl<sub>3</sub>) δ 7.51 (d, J = 7.5 Hz, 2H), 7.42 (d, J = 8.7 Hz, 1H), 7.37 (t, J = 7.2 Hz, 2H), 7.29-7.23 (m, 1H), 7.09 (d, J = 3.0 Hz, 1H), 6.80 (dd, J = 8.7, 3.0 Hz, 1H), 6.44 (s, 1H), 3.78 (s, 3H), 1.83 (s, 6H); <sup>13</sup>C NMR (75 MHz, CDCl<sub>3</sub>) δ 165.9, 158.8, 146.3, 138.8, 134.0, 128.3, 126.7, 124.8, 117.6, 114.7, 109.2, 56.8, 55.5, 28.8. Elemental analysis for C<sub>17</sub>H<sub>18</sub>BrNO<sub>2</sub>: C, 58.63; H, 5.21. Found: C, 58.86; H, 5.40.

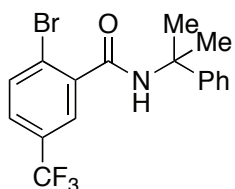

**2-bromo-N-(2-phenyl-2-propyl)-5-(trifluoromethyl)benzamide**

(Table 2, entry m) The title compound was obtained in 96% yield as a white solid from 2-bromo-5-(trifluoromethyl)benzoic acid by using the general procedure. MP = 110-111 °C; IR (thin film): 3267, 1653, 1547 cm<sup>-1</sup>; <sup>1</sup>H NMR (300 MHz, CDCl<sub>3</sub>) δ 7.70-7.63 (m, 2H), 7.49-7.26 (m, 6H), 6.56 (s, 1H), 1.78 (s, 6H); <sup>13</sup>C NMR (75 MHz, CDCl<sub>3</sub>) δ 165.0, 146.0, 139.1, 133.8, 129.9 (q, J = 35.0 Hz), 128.4, 127.3, 126.9, 126.3, 124.8, 123.3 (q, J = 270.4 Hz), 123.1, 57.0, 28.7. <sup>19</sup>F NMR (282 MHz, CDCl<sub>3</sub>) δ -63.1. Elemental analysis for C<sub>17</sub>H<sub>15</sub>BrF<sub>3</sub>NO: C, 52.87; H, 3.91. Found: C, 53.02; H, 3.83.

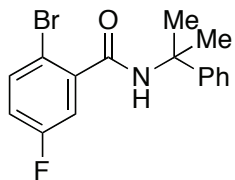

**2-bromo-5-fluoro-N-(2-phenyl-2-propyl)benzamide**

(Table 2, entry n) The title compound was obtained in 91% yield as a white solid from 2-bromo-5-fluorobenzoic acid by using the general procedure. MP = 140-140.5 °C; IR (thin film): 3259, 1663, 1540 cm<sup>-1</sup>; <sup>1</sup>H NMR (300 MHz, CDCl<sub>3</sub>) δ 7.51-7.47 (m, 3H), 7.37 (t J = 7.7 Hz, 2H), 7.29-7.23 (m, 1H), 7.19 (dd, J = 8.4, 3.3 Hz, 1H), 6.96 (ddd, J = 9.0, 7.8, 3.3 Hz, 1H), 6.52 (s, 1H), 1.79 (s, 6H); <sup>13</sup>C NMR (75 MHz, CDCl<sub>3</sub>) δ 165.3 (d, J = 1.9 Hz), 161.9 (d, J = 247.7 Hz), 146.5, 140.2 (d, J = 6.5 Hz), 135.0 (d, J = 7.7 Hz), 128.7, 127.1, 125.1, 118.6 (d, J = 22.2 Hz), 117.1 (d, J = 23.9 Hz), 113.6 (d, J = 3.4 Hz), 57.2, 29.1. <sup>19</sup>F NMR (282 MHz, CDCl<sub>3</sub>) δ -114.0. Elemental analysis for C<sub>16</sub>H<sub>15</sub>BrFNO: C, 57.16; H, 4.50. Found: C, 57.29; H, 4.38.

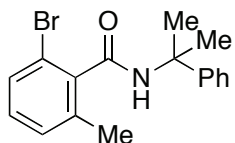

**2-bromo-6-methyl-N-(2-phenyl-2-propyl)benzamide**

(Table 2, entry o) The title compound was obtained in 80% yield as a white solid from 2-bromo-6-methylbenzoic acid by using the general procedure. MP = 164-166 °C; IR (thin film): 3276, 1653, 1539 cm<sup>-1</sup>; <sup>1</sup>H NMR (400 MHz,

CDCl<sub>3</sub>)  $\delta$  7.54-7.51 (m, 2H), 7.36-7.31 (m, 3H), 7.26-7.22(m, 1H), 7.10-7.03 (m, 2H), 6.00 (s, 1H), 2.34 (s, 3H), 1.83 (s, 6H); <sup>13</sup>C NMR (100 MHz, CDCl<sub>3</sub>)  $\delta$  166.8, 146.6, 138.9, 137.2, 129.9, 129.8, 129.1, 128.3, 126.9, 125.0, 119.3, 56.7, 28.3, 19.4. Elemental analysis for C<sub>17</sub>H<sub>18</sub>BrNO: C, 61.46; H, 5.46. Found: C, 61.18; H, 5.32.

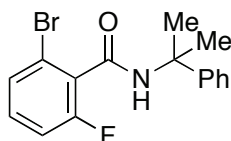

**2-bromo-6-fluoro-N-(2-phenyl-2-propyl)benzamide** (Table 2, entry p) The title compound was obtained in 91% yield as a white solid from 2-bromo-6-fluorobenzoic acid by using the general

procedure. MP = 152.5-153.5 °C; IR (thin film): 3283, 1655, 1546 cm<sup>-1</sup>; <sup>1</sup>H NMR (300 MHz, CDCl<sub>3</sub>)  $\delta$  7.54-7.50 (m, 2H), 7.39-7.32 (m, 3H), 7.29-7.16 (m, 2H), 7.04 (t, J = 8.4 Hz, 1H), 6.17 (s, 1H), 1.81 (s, 6H); <sup>13</sup>C NMR (75 MHz, CDCl<sub>3</sub>)  $\delta$  162.0, 159.2 (d, J = 250.0 Hz), 146.2, 131.1 (d, J = 8.6 Hz), 128.5 (d, J = 3.5 Hz), 128.3, 127.8 (d, J = 21.8 Hz), 126.8, 124.9, 120.5 (d, J = 4.8 Hz), 114.8 (d, J = 21.8 Hz), 57.1, 28.7. <sup>19</sup>F NMR (282 MHz, CDCl<sub>3</sub>)  $\delta$  -113.0. Elemental analysis for C<sub>16</sub>H<sub>15</sub>BrFNO: C, 57.16; H, 4.50. Found: C, 57.19; H, 4.40.

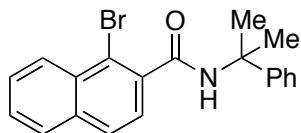

**1-bromo-N-(2-phenyl-2-propyl)-2-naphthamide** (Scheme 3, entry a) The title compound was obtained in 92% yield as a white solid from 1-bromo-2-naphthoic acid by using the general

procedure. MP = 158-159 °C; IR (thin film): 3311, 1667, 1534 cm<sup>-1</sup>; <sup>1</sup>H NMR (400 MHz, CDCl<sub>3</sub>)  $\delta$  8.29 (d, J = 8.4 Hz, 1H), 7.77 (d, J = 8.0 Hz, 1H), 7.74 (d, J = 8.4 Hz, 1H), 7.62-7.58 (m, 1H), 7.55-7.51 (m, 3H), 7.42 (d, J = 8.4 Hz, 1H), 7.36 (t, J = 7.7 Hz, 2H), 7.27-7.23 (m, 1H), 6.33 (s, 1H), 1.84 (s, 6H); <sup>13</sup>C NMR (100 MHz, CDCl<sub>3</sub>)  $\delta$  167.3, 146.5, 136.8, 134.3, 131.7, 128.4, 128.13, 128.11, 128.0, 127.7, 127.3, 126.8, 125.1, 124.8, 119.5, 56.9, 28.8. Elemental analysis for C<sub>20</sub>H<sub>18</sub>BrNO: C, 65.23; H, 4.93. Found: C, 65.28; H, 4.85.

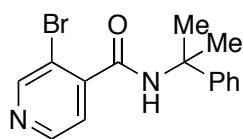

**3-bromo-N-(2-phenyl-2-propyl)isonicotinamide** (Scheme 3, entry b) The title compound was obtained in 80% yield as a yellow solid from 3-bromoisonicotinic acid by using the general procedure.

MP = 128-130 °C; IR (thin film): 3268, 1653, 1546 cm<sup>-1</sup>; <sup>1</sup>H NMR (400 MHz, CDCl<sub>3</sub>)  $\delta$  8.63 (s, 1H), 8.44 (d, J = 4.3 Hz, 1H), 7.43 (d, J = 7.6 Hz, 2H), 7.34-7.21 (m, 4H), 6.61

(s, 1H), 1.75 (s, 6H);  $^{13}\text{C}$  NMR (100 MHz,  $\text{CDCl}_3$ )  $\delta$  164.0, 152.4, 148.5, 145.8, 144.7, 128.4, 126.9, 124.7, 123.3, 117.0, 57.1, 28.7. Elemental analysis for  $\text{C}_{15}\text{H}_{15}\text{BrN}_2\text{O}$ : C, 56.44; H, 4.74. Found: C, 56.52; H, 4.63.

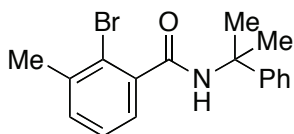

**2-bromo-3-methyl-N-(2-phenyl-2-propyl)benzamide**

(Scheme 3, entry c) The title compound was obtained in 90% yield as a white solid from 2-bromo-3-methylbenzoic acid by using the general procedure. MP = 134-135.5 °C; IR (thin film): 3284, 1653, 1540  $\text{cm}^{-1}$ ;  $^1\text{H}$  NMR (400 MHz,  $\text{CDCl}_3$ )  $\delta$  7.51-7.47 (m, 2H), 7.36-7.32 (m, 2H), 7.25-7.17 (m, 4H), 6.10 (s, 1H), 2.41 (s, 3H), 1.81 (s, 6H);  $^{13}\text{C}$  NMR (100 MHz,  $\text{CDCl}_3$ )  $\delta$  167.2, 146.5, 139.7, 139.0, 131.5, 128.4, 127.2, 126.8, 126.2, 124.8, 121.5, 56.8, 28.7, 23.5. Elemental analysis for  $\text{C}_{17}\text{H}_{18}\text{BrNO}$ : C, 61.46; H, 5.46. Found: C, 61.21; H, 5.38.

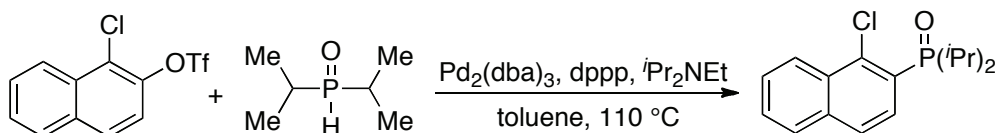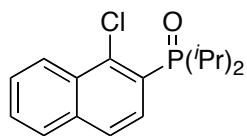

**(1-chloro-2-naphthyl)diisopropylphosphine oxide** (Figure 2)

A solution of 1-chloro-2-naphthyl trifluoromethanesulfonate (3.10 g, 10 mmol, 1.0 equiv), and diisopropylphosphine oxide (1.61 g, 12 mmol, 1.2 equiv), *N,N*-diisopropylethylamine (2.61 mL, 15 mmol, 1.5 equiv),  $\text{Pd}_2(\text{dba})_3$  (228 mg, 0.25 mmol, 5 mol% Pd), and 1,3-bis(diphenylphosphino)propane (206 mg, 0.50 mmol, 5 mol%) in toluene (20 mL) under Ar was stirred at 110 °C for 40 h. The mixture was then cooled to room temperature and filtered through celite. The solution was concentrated, and purified by flash chromatography on silica gel to give 1.56 g (53%) of the title compound as an off white solid. MP = 104-106 °C; IR (thin film): 2968, 1466, 1185  $\text{cm}^{-1}$ ;  $^1\text{H}$  NMR (300 MHz,  $\text{CDCl}_3$ )  $\delta$  8.34-8.30 (m, 1H), 8.17 (t,  $J$  = 9.0 Hz, 1H), 7.88-7.82 (m, 2H), 7.61-7.55 (m, 2H), 2.73-2.62 (m, 2H), 1.37 (d,  $J$  = 7.2 Hz, 3H), 1.32 (d,  $J$  = 7.2 Hz, 3H), 0.97 (d,  $J$  = 7.2 Hz, 3H), 0.92 (d,  $J$  = 7.2 Hz, 3H);  $^{13}\text{C}$  NMR (75 MHz,  $\text{CDCl}_3$ ) Due to the complexity of the spectra all the peaks are listing without take into consideration C-P couplings.  $\delta$  135.84, 135.82, 132.8, 132.7, 130.5, 130.4, 130.2, 130.1, 128.9, 128.14, 128.11, 127.9, 127.5, 127.0, 126.9, 124.6, 27.6, 26.8, 16.97,



16.92, 16.27, 16.22;  $^{31}\text{P}$  NMR (121 MHz,  $\text{CDCl}_3$ )  $\delta$  55.5. Elemental analysis for  $\text{C}_{16}\text{H}_{20}\text{ClOP}$ : C, 65.20; H, 6.84. Found: C, 64.91; H, 6.84.

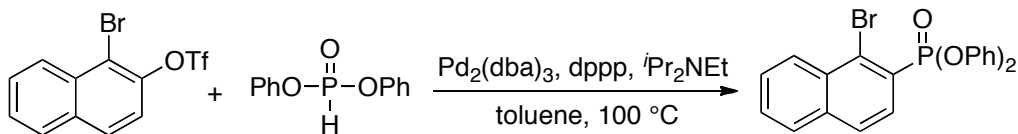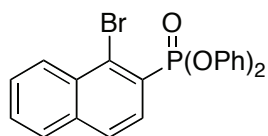

**diphenyl (1-bromo-2-naphthyl)phosphonate** (Scheme 2, entry c) A solution of 1-bromo-2-naphthyl triflate (3.55 g, 10 mmol, 1.0 equiv), diphenyl phosphonate (2.30 mL, 12 mmol, 1.2 equiv), *N,N*-diisopropylethylamine (2.61 mL, 15 mmol, 1.5 equiv),  $\text{Pd}_2(\text{dba})_3$  (228 mg, 0.25 mmol, 5 mol% Pd), and 1,3-bis(diphenylphosphino)propane (206 mg, 0.50 mmol, 5 mol%) in toluene (20 mL) under Ar was stirred at 110 °C for 40 h. The mixture was then cooled to room temperature and filtered through celite. The solution was concentrated, and purified by flash chromatography on silica gel to give 3.11g (71%) of the title compound as a white solid. IR (thin film): 1589, 1489, 1187  $\text{cm}^{-1}$ ;  $^1\text{H}$  NMR (300 MHz,  $\text{CDCl}_3$ )  $\delta$  8.52 (d,  $J = 8.7$  Hz, 1H), 8.19 (dd,  $J = 12.9, 8.4$  Hz, 1H), 7.86 (ddd,  $J = 12.3, 8.7, 3.6$  Hz, 2H), 7.64-7.60 (m, 2H), 7.32-7.27 (m, 7H), 7.17-7.11 (m, 3H);  $^{13}\text{C}$  NMR (75 MHz,  $\text{CDCl}_3$ )

Due to the complexity of the spectra all the peaks are listing without take into consideration C-P couplings.  $\delta$  150.3, 150.2, 136.21, 136.18, 132.5, 132.3, 130.5, 130.4, 129.6, 129.1, 128.62, 128.58, 128.5, 128.28, 128.26, 128.24, 127.8, 127.6, 127.3, 125.12, 125.10, 124.6, 120.5, 120.4;  $^{31}\text{P}$  NMR (121 MHz,  $\text{CDCl}_3$ )  $\delta$  9.6. Elemental analysis for  $\text{C}_{22}\text{H}_{16}\text{BrO}_3\text{P}$ : C, 60.16; H, 3.67. Found: C, 60.00; H, 3.52.

**General Procedure for the Palladium-catalyzed Asymmetric Suzuki-coupling:** An oven-dried resealable Schlenk tube was charged with the  $\text{Pd}(\text{OAc})_2$  (2.5-5.0 mol%), (*S*)-KenPhos (L : Pd = 1.2 : 1), aryl halide (1.0 mmol, 1.0 equiv), arylboronic acid (1.5-2.0 mmol, 1.5-2.0 equiv), and  $\text{K}_3\text{PO}_4$  ( 3 equiv). The Schlenk tube was capped with a rubber septum and twice evacuated and backfilled with argon. THF (2.5-3 mL per mmol aryl halide) was injected into the Schlenk tube. The septum was replaced with a teflon screwcap. The Schlenk tube was sealed, and the mixture was stirred vigorously at the indicated temperature (room temperature–80 °C) for 24–40 h. The reaction was monitored by TLC or GC analysis. The reaction mixture was then cooled to room

temperature, diluted with ethyl acetate and water, extracted, the combined organic layers was dried over anhydrous  $\text{Na}_2\text{SO}_4$  and concentrated. The crude material was purified by flash chromatography on silica gel.

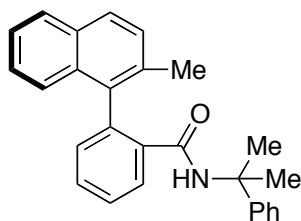

**(R)-2-(2-methyl-1-naphthyl)-N-(2-phenyl-2-propyl)**

**benzamide** (Table 2, entry b) The reaction was conducted for 40 h according to the general procedure (5 mol% Pd, 6 mol% (S)-KenPhos and 2.0 equiv of boronic acid). The title product was purified by flash chromatography (eluted with 10% ethyl acetate in hexanes to 15% ethyl acetate in hexanes) gave 311 mg (83%) desired product as a white solid. MP = 86-87.5 °C. Separation of enantiomers by Chiral HPLC [Daicel Chiracel<sup>®</sup> OD-H column, flow rate 1.0 mL/min, 3% *i*-PrOH, 97% hexane,  $T_{\text{major}}$ : 10.4 min (*R*),  $T_{\text{minor}}$ : 12.3 min (*S*)] provided the product with (93% ee).  $[\alpha]_{\text{D}} = -30.5$  ( $c = 0.33$ ,  $\text{CHCl}_3$ ); IR (thin film): 3421, 1660, 1510  $\text{cm}^{-1}$ ;  $^1\text{H NMR}$  (300 MHz,  $\text{CDCl}_3$ )  $\delta$  8.07-8.04 (m, 1H), 7.89 (t,  $J = 8.7$  Hz, 2H), 7.60-7.50 (m, 2H), 7.50-7.46 (m, 2H), 7.44-7.35 (m, 2H), 7.26-7.22 (m, 1H), 7.10-7.08 (m, 3H), 6.74-6.71 (m, 2H), 5.65 (s, 1H), 2.23 (s, 3H), 1.06 (s, 3H), 0.97 (s, 3H);  $^{13}\text{C NMR}$  (100 MHz,  $\text{CDCl}_3$ )  $\delta$  166.2, 146.1, 136.5, 136.4, 136.2, 134.1, 132.7, 132.1, 130.7, 130.5, 129.9, 128.8, 128.2, 128.1, 128.0, 127.9 (2C), 127.0, 126.1, 125.4, 125.2, 124.4 (2C), 55.1, 28.2, 27.7, 20.6. Elemental analysis for  $\text{C}_{27}\text{H}_{25}\text{NO}$ : C, 85.45; H, 6.64. Found: C, 85.42; H, 6.58.

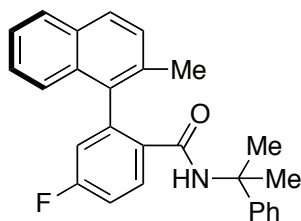

**(R)-4-fluoro-2-(2-methyl-1-naphthyl)-N-(2-phenyl-2-propyl)**

**benzamide** (Table 2, entry f) The reaction was conducted for 40 h according to the general procedure (5 mol% Pd, 6 mol% (S)-KenPhos and 1.5 equiv of boronic acid). The title product was purified by flash chromatography (eluted with 9% ethyl acetate in hexanes) gave 330 mg (83%) desired product as a white solid. MP = 101.5-103.5 °C. Separation of enantiomers by Chiral HPLC [Daicel Chiracel<sup>®</sup> OD-H column, flow rate 1.0 mL/min, 10% *i*-PrOH, 90% hexane,  $T_{\text{major}}$ : 6.4 min (*R*),  $T_{\text{minor}}$ : 7.3 min (*S*)] provided the product with (93% ee).  $[\alpha]_{\text{D}} = -29.7$  ( $c = 0.59$ ,  $\text{CHCl}_3$ ); IR (thin film): 3413, 1662, 1511  $\text{cm}^{-1}$ ;  $^1\text{H NMR}$  (300 MHz,  $\text{CDCl}_3$ )  $\delta$  8.11 (dd,  $J = 8.7, 6.0$  Hz, 1H), 7.90 (t,  $J = 8.7$  Hz, 2H), 7.53-7.42 (m, 3H), 7.38-7.35 (m, 1H), 7.23 (ddd,  $J = 8.7,$

8.1, 2.7 Hz, 1H), 7.12-7.08 (m, 3H), 6.95 (dd,  $J = 9.0, 2.4$  Hz, 1H), 6.74-6.70 (m, 2H), 5.63 (s, 1H), 2.26 (s, 3H), 1.06 (s, 3H), 0.97 (s, 3H);  $^{13}\text{C}$  NMR (75 MHz,  $\text{CDCl}_3$ )  $\delta$  165.0, 163.7 (d,  $J = 250.8$  Hz), 146.0, 139.1 (d,  $J = 8.2$  Hz), 135.0 (d,  $J = 1.4$  Hz), 134.0, 132.7 (d,  $J = 8.9$  Hz), 132.3 (d,  $J = 3.2$  Hz), 132.2, 132.0, 128.7, 128.6, 128.3, 127.9, 127.2, 126.2, 125.7, 124.9, 124.3, 117.4 (d,  $J = 21.3$  Hz), 115.2 (d,  $J = 21.0$  Hz), 55.0, 28.2, 27.7, 20.5.  $^{19}\text{F}$  NMR (282 MHz,  $\text{CDCl}_3$ )  $\delta$  -110.1. Elemental analysis for  $\text{C}_{27}\text{H}_{24}\text{FNO}$ : C, 81.59; H, 6.09. Found: C, 81.44; H, 6.09.

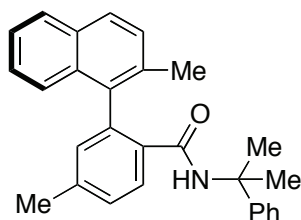

**(*R*)-4-methyl-2-(2-methyl-1-naphthyl)-*N*-(2-phenyl-2-propyl)benzamide** (Table 2, entry h) The reaction was

conducted for 40 h according to the general procedure (5 mol% Pd, 6 mol% (*S*)-KenPhos and 2 equiv of boronic acid).

The title product was purified by flash chromatography (eluted with 15% ethyl acetate in hexanes) gave 322 mg (82%) desire product as a white solid. MP = 179-181 °C. Separation of enantiomers by Chiral HPLC [Daicel Chiracel<sup>®</sup> OD-H column, flow rate 1.0 mL/min, 2.5%  $i$ PrOH, 97.5% hexane,  $T_{\text{major}}$ : 12.1 min (*R*),  $T_{\text{minor}}$ : 14.1 min (*S*)] provided the product with (94% ee).  $[\alpha]_{\text{D}} = +8.9$  ( $c = 0.41$ ,  $\text{CHCl}_3$ ); IR (thin film): 3393, 1658, 1520  $\text{cm}^{-1}$ ;  $^1\text{H}$  NMR (300 MHz,  $\text{CDCl}_3$ )  $\delta$  7.99 (d,  $J = 8.1$  Hz, 1H), 7.89 (d,  $J = 8.1$  Hz, 1H), 7.85 (d,  $J = 8.4$  Hz, 1H), 7.50-7.33 (m, 5H), 7.10-7.03 (m, 4H), 6.74-6.71 (m, 2H), 5.66 (s, 1H), 2.43 (s, 3H), 2.24 (s, 3H), 1.06 (s, 3H), 0.96 (s, 3H);  $^{13}\text{C}$  NMR (75 MHz,  $\text{CDCl}_3$ )  $\delta$  166.1, 146.2, 140.8, 136.4, 134.0, 133.2, 132.7, 132.1, 131.23, 131.18, 130.1, 128.81, 128.76, 128.12, 128.05, 127.9, 126.9, 126.1, 125.44, 125.36, 124.3, 54.9, 28.3, 27.8, 21.3, 20.6. Elemental analysis for  $\text{C}_{28}\text{H}_{27}\text{NO}$ : C, 85.46; H, 6.92. Found: C, 85.21; H, 6.95.

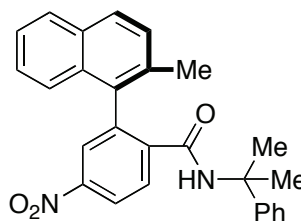

**(*S*)-2-(2-methyl-1-naphthyl)-4-nitro-*N*-(2-phenyl-2-propyl)benzamide** (Table 2, entry j) The reaction was

conducted for 40 h according to the general procedure (2.5 mol% Pd, 3 mol% (*R*)-KenPhos and 2 equiv of boronic acid).

The title product was purified by flash chromatography (eluted with 15% ethyl acetate in hexanes) gave 382 mg (90%) desire product as a white solid. MP = 85 °C (Dec.). Separation of enantiomers by Chiral HPLC [Daicel Chiracel<sup>®</sup> AD-H

column, flow rate 1.0 mL/min, 10% *i*PrOH, 90% hexane,  $T_{\text{minor}}$ : 28.6 min (*R*),  $T_{\text{major}}$ : 46.9 min (*S*)] provided the product with (88% ee).  $[\alpha]_{\text{D}} = -25.1$  ( $c = 1.23$ ,  $\text{CHCl}_3$ ); IR (thin film): 3414, 2978, 1670, 1521  $\text{cm}^{-1}$ ;  $^1\text{H}$  NMR (400 MHz,  $\text{CDCl}_3$ )  $\delta$  8.34 (dd,  $J = 8.6, 2.3$  Hz, 1H), 8.14 (d,  $J = 8.6$  Hz, 1H), 8.12 (d,  $J = 2.3$  Hz, 1H), 7.91 (d,  $J = 8.0$  Hz, 1H), 7.90 (d,  $J = 8.4$  Hz, 1H), 7.51-7.47 (m, 1H), 7.47 (d,  $J = 8.5$  Hz, 1H), 7.43-7.39 (m, 1H), 7.22 (d,  $J = 9.3$  Hz, 1H), 7.08-7.04 (m, 3H), 6.66-6.64 (m, 2H), 5.65 (s, 1H), 2.19 (s, 3H), 1.03 (s, 3H), 0.97 (s, 3H);  $^{13}\text{C}$  NMR (75 MHz,  $\text{CDCl}_3$ )  $\delta$  164.3, 148.7, 145.5, 142.3, 138.2, 134.4, 133.6, 132.2, 132.0, 131.3, 129.1, 128.8, 128.6, 128.0, 127.6, 126.5, 126.0, 125.8, 124.4, 124.2, 122.9, 55.6, 28.0, 27.5, 20.6. Elemental analysis for  $\text{C}_{27}\text{H}_{24}\text{N}_2\text{O}_3$ : C, 76.39; H, 5.70. Found: C, 75.90; H, 5.72.

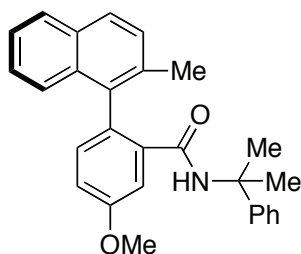

**(*R*)-5-methoxy-2-(2-methyl-1-naphthyl)-*N*-(2-phenyl-2-propyl)benzamide** (Table 2, entry k)

The reaction was conducted for 40 h according to the general procedure (5 mol% Pd, 6 mol% (*S*)-KenPhos and 2 equiv of boronic acid).

The title product was purified by flash chromatography (eluted with 15% ethyl acetate in hexanes to 20% ethyl acetate in hexanes) gave 340 mg (83%) desire product as a white solid. MP = 135.5-137 °C. Separation of enantiomers by Chiral HPLC [Daicel Chiracel<sup>®</sup> OD-H column, flow rate 1.0 mL/min, 5% *i*PrOH, 95% hexane,  $T_{\text{major}}$ : 8.6 min (*R*),  $T_{\text{minor}}$ : 10.0 min (*S*)] provided the product with (94% ee).  $[\alpha]_{\text{D}} = -33.4$  ( $c = 0.85$ ,  $\text{CHCl}_3$ ); IR (thin film): 3419, 1666, 1604, 1509, 1293  $\text{cm}^{-1}$ ;  $^1\text{H}$  NMR (400 MHz,  $\text{CDCl}_3$ )  $\delta$  7.86 (d,  $J = 8.1$  Hz, 1H), 7.83 (d,  $J = 8.4$  Hz, 1H), 7.60 (s, 1H), 7.47-7.41 (m, 1H), 7.43 (d,  $J = 8.4$  Hz, 1H), 7.39-7.37 (m, 2H), 7.10 (s, 2H), 7.08-7.05 (m, 3H), 6.71-6.69 (m, 2H), 5.69 (s, 1H), 3.89 (s, 3H), 2.21 (s, 3H), 1.02 (s, 3H), 0.92 (s, 3H);  $^{13}\text{C}$  NMR (100 MHz,  $\text{CDCl}_3$ )  $\delta$  165.8, 159.2, 146.1, 137.1, 136.0, 134.5, 133.1, 132.1, 132.0, 128.8, 128.6, 128.13, 128.07, 127.9, 126.9, 126.2, 125.4, 125.3, 124.3, 117.9, 113.6, 55.5, 55.0, 28.2, 27.7, 20.7. Elemental analysis for  $\text{C}_{28}\text{H}_{27}\text{NO}_2$ : C, 82.12; H, 6.65. Found: C, 81.99; H, 6.71.

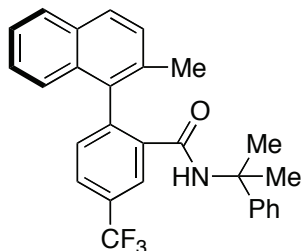

**(R)-2-(2-methyl-1-naphthyl)-N-(2-phenyl-2-propyl)-5-(trifluoromethyl)benzamide** (Table 2, entry m)

The reaction was conducted for 40 h according to the general procedure (2.5 mol% Pd, 3 mol% (*S*)-KenPhos and 2 equiv of boronic acid). The title product was purified by flash chromatography (eluted with 9% ethyl acetate in hexanes) gave 389 mg (87%) desire product as a white solid. MP = 109-110.5 °C. Separation of enantiomers by Chiral HPLC [Daicel Chiracel<sup>®</sup> OD-H column, flow rate 1.0 mL/min, 1% *i*PrOH, 99% hexane,  $T_{\text{major}}$ : 9.2 min (*R*),  $T_{\text{minor}}$ : 10.5 min (*S*)] provided the product with (89% ee).  $[\alpha]_{\text{D}} = -20.3$  ( $c = 0.70$ ,  $\text{CHCl}_3$ ); IR (thin film): 3415, 1669, 1517, 1333  $\text{cm}^{-1}$ ;  $^1\text{H}$  NMR (300 MHz,  $\text{CDCl}_3$ )  $\delta$  8.37 (s, 1H), 7.92 (d,  $J = 7.5$  Hz, 1H), 7.91 (d,  $J = 8.4$  Hz, 1H), 7.83 (d,  $J = 7.8$  Hz, 1H), 7.53-7.46 (m, 2H), 7.42 (d,  $J = 6.9, 1.5$  Hz, 1H), 7.38 (d,  $J = 7.8$  Hz, 1H), 7.27 (d,  $J = 9.0$  Hz, 1H), 7.11-7.08 (m, 3H), 6.73-6.69 (m, 2H), 5.69 (s, 1H), 2.22 (s, 3H), 1.08 (s, 3H), 0.99 (s, 3H);  $^{13}\text{C}$  NMR (75 MHz,  $\text{CDCl}_3$ )  $\delta$  164.6, 145.7, 140.3, 136.9, 134.7, 134.1, 132.2, 132.0, 131.6, 130.5 (q,  $J = 32.9$  Hz), 128.79, 128.76, 128.4, 128.0, 127.4, 127.1 (q,  $J = 3.5$  Hz), 126.4, 125.8, 124.8, 124.30, 124.28, 122.0, 55.3, 28.1, 27.6, 20.6.  $^{19}\text{F}$  NMR (282 MHz,  $\text{CDCl}_3$ )  $\delta$  -63.0. Elemental analysis for  $\text{C}_{28}\text{H}_{24}\text{F}_3\text{NO}$ : C, 75.15; H, 5.41. Found: C, 75.29; H, 5.44.

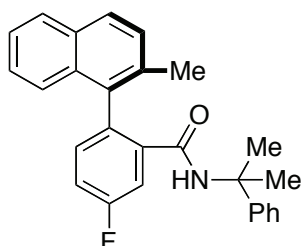

**(S)-5-fluoro-2-(2-methyl-1-naphthyl)-N-(2-phenyl-2-propyl)benzamide** (Table 2, entry n)

The reaction was conducted for 40 h according to the general procedure (5 mol% Pd, 6 mol% (*R*)-KenPhos and 1.5 equiv of boronic acid). The title product was purified by flash chromatography (eluted with 9% ethyl acetate in hexanes) gave 338 mg (85%) desire product as a colorless oil. Separation of enantiomers by Chiral HPLC [Daicel Chiracel<sup>®</sup> OD-H column, flow rate 1.0 mL/min, 10% *i*PrOH, 90% hexane,  $T_{\text{minor}}$ : 5.9 min (*R*),  $T_{\text{major}}$ : 6.7 min (*S*)] provided the product with (92% ee).  $[\alpha]_{\text{D}} = +32.0$  ( $c = 0.81$ ,  $\text{CHCl}_3$ ); IR (thin film): 3416, 2977, 1667, 1510  $\text{cm}^{-1}$ ;  $^1\text{H}$  NMR (300 MHz,  $\text{CDCl}_3$ )  $\delta$  7.89 (t,  $J = 8.4$  Hz, 2H), 7.79 (dd,  $J = 9.6, 2.7$  Hz, 1H), 7.52-7.40 (m, 3H), 7.36-7.17 (m, 3H), 7.11-7.07 (m, 3H), 6.72-6.69 (m, 2H), 5.69 (s, 1H), 2.23 (s, 3H), 1.06 (s, 3H), 0.97 (s, 3H);  $^{13}\text{C}$  NMR (75 MHz,  $\text{CDCl}_3$ )  $\delta$  164.7, 162.3 (d,  $J = 246.2$  Hz), 145.8, 138.2 (d,  $J = 6.9$  Hz), 135.1, 134.4, 132.7, 132.6, 132.5,

132.3 (d, J = 3.6 Hz), 132.1, 128.8, 128.3 (d, J = 12.4 Hz), 128.0, 127.2, 126.3, 125.6, 125.0, 124.3, 117.8 (d, J = 21.3 Hz), 116.9 (d, J = 23.2 Hz), 55.2, 28.1, 27.6, 20.6.  $^{19}\text{F}$  NMR (282 MHz,  $\text{CDCl}_3$ )  $\delta$  -113.9, Elemental analysis for  $\text{C}_{27}\text{H}_{24}\text{FNO}$ : C, 81.59; H, 6.09. Found: C, 81.61; H, 6.23.

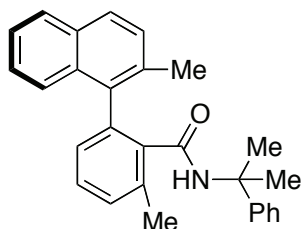

**(R)-2-methyl-6-(2-methyl-1-naphthyl)-N-(2-phenyl-2-propyl)benzamide** (Table 2, entry o) The reaction was conducted for 40 h according to the general procedure (5 mol% Pd, 6 mol% (*S*)-KenPhos and 1.5 equiv of boronic acid). The title product was purified by flash chromatography (eluted

with 9% ethyl acetate in hexanes) gave 315 mg (80%) desire product as a white solid. MP = 114-116 °C. Separation of enantiomers by Chiral HPLC [Daicel Chiracel<sup>®</sup> OD-H column, flow rate 1.0 mL/min, 2% *i*PrOH, 98% hexane,  $T_{\text{minor}}$ : 7.4 min (*R*),  $T_{\text{major}}$ : 8.6 min (*S*)] provided the product with (48% ee).  $[\alpha]_{\text{D}} = -42.5$  ( $c = 0.42$ ,  $\text{CHCl}_3$ ); IR (thin film): 3420, 2974, 1672, 1502  $\text{cm}^{-1}$ ;  $^1\text{H}$  NMR (300 MHz,  $\text{CDCl}_3$ )  $\delta$  7.93 (d, J = 8.1 Hz, 1H), 7.88 (d, J = 8.4 Hz, 1H), 7.48-7.30 (m, 6H), 7.10-7.07 (m, 4H), 6.67-6.64 (m, 2H), 5.36 (s, 1H), 2.47 (s, 3H), 2.24 (s, 3H), 1.06 (s, 3H), 0.93 (s, 3H);  $^{13}\text{C}$  NMR (75 MHz,  $\text{CDCl}_3$ )  $\delta$  167.6, 146.2, 138.3, 136.2, 136.0, 135.9, 135.0, 133.3, 131.8, 129.5, 128.9, 128.7, 128.3, 128.0, 127.6, 127.5, 126.6, 126.2, 125.0, 124.8, 124.4, 55.5, 28.4, 26.7, 20.7, 19.4. Elemental analysis for  $\text{C}_{28}\text{H}_{27}\text{NO}$ : C, 85.46; H, 6.92. Found: C, 85.11; H, 6.94.

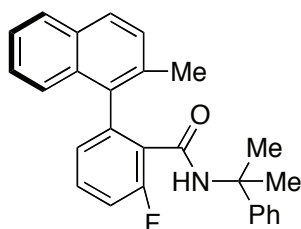

**(R)-2-fluoro-6-(2-methyl-1-naphthyl)-N-(2-phenyl-2-propyl)benzamide** (Table 2, entry p) The reaction was conducted for 40 h according to the general procedure (5 mol% Pd, 6 mol% (*S*)-KenPhos and 2 equiv of boronic acid). The title product was purified by Biotage (eluted with gradient:

0-30% ethyl acetate in hexanes) gave 183 mg (46%) desire product as a white solid. MP = 121-123 °C. Separation of enantiomers by Chiral HPLC [Daicel Chiracel<sup>®</sup> AD-H column, flow rate 1.0 mL/min, 10% *i*PrOH, 90% hexane,  $T_{\text{major}}$ : 6.5 min (*S*),  $T_{\text{minor}}$ : 7.5 min (*R*)] provided the product with (90% ee).  $[\alpha]_{\text{D}} = -67.9$  ( $c = 0.60$ ,  $\text{CHCl}_3$ ); IR (thin film): 3418, 2977, 1675, 1508  $\text{cm}^{-1}$ ;  $^1\text{H}$  NMR (300 MHz,  $\text{CDCl}_3$ )  $\delta$  7.92 (d, J = 8.7 Hz, 1H), 7.87 (d, J = 8.4 Hz, 1H), 7.53-7.34 (m, 5H), 7.29-7.19 (m, 2H), 7.09-7.05 (m, 3H), 6.69-

6.53 (m, 2H), 5.44 (s, 1H), 2.24 (s, 3H), 1.09 (s, 3H), 1.05 (s, 3H);  $^{13}\text{C}$  NMR (75 MHz,  $\text{CDCl}_3$ )  $\delta$  162.8, 159.7 (d,  $J = 248.6$  Hz), 145.8, 139.1 (d,  $J = 3.6$  Hz), 134.9, 134.3 (d,  $J = 2.0$  Hz), 132.9, 131.7, 130.5 (d,  $J = 8.8$  Hz), 128.8, 128.3, 128.0, 127.9, 126.9 (d,  $J = 17.6$  Hz), 126.7, 126.2, 126.0 (d,  $J = 3.2$  Hz), 124.9, 124.7, 124.3, 115.1 (d,  $J = 21.5$  Hz), 56.0, 28.3, 27.4, 20.7.  $^{19}\text{F}$  NMR (282 MHz,  $\text{CDCl}_3$ )  $\delta$  -116.0. Elemental analysis for  $\text{C}_{27}\text{H}_{24}\text{FNO}$ : C, 81.59; H, 6.09. Found: C, 81.37; H, 6.00.

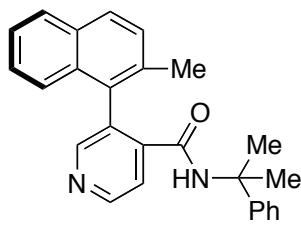

**(S)-3-(2-methyl-1-naphthyl)-N-(2-phenyl-2-**

**propyl)isonicotinamide** (Scheme 3, entry b) A oven-dried resealable Schlenk tube was charged with the  $\text{Pd}(\text{OAc})_2$  (5 mol%), (S)-KenPhos (6 mol%), aryl halide (0.5 mmol, 1.0 equiv), arylboronic acid (1.0 mmol, 2.0 equiv), and  $\text{K}_3\text{PO}_4$  (3

equiv). The Schlenk tube was capped with a rubber septum and twice evacuated and backfilled with argon. Toluene (1.5 mL) was injected into the Schlenk tube. The septum was replaced with a teflon screwcap. The Schlenk tube was sealed, and the mixture was stirred at 80 °C for 20 h. Then  $\text{Pd}(\text{OAc})_2$  (5 mol%) (S)-KenPhos (6 mol%), arylboronic acid (1.0 mmol, 2.0 equiv) was added to the reaction mixture and washed with 0.3 mL of toluene, the Schlenk tube was sealed and stirred at 80 °C for another 20 h. The reaction mixture was then cooled to room temperature, diluted with ethyl acetate and water, extracted, the combined organic layers was dried over anhydrous  $\text{Na}_2\text{SO}_4$  and concentrated. The title product was purified by flash chromatography (eluted with 50% ethyl acetate in hexanes to 100% ethyl acetate) gave 162 mg (85%) desired product as a yellow sticky oil. Separation of enantiomers by Chiral HPLC [Daicel Chiralcel<sup>®</sup> AD-H column, flow rate 1.0 mL/min, 10%  $i$ -PrOH, 90% hexane,  $T_{\text{major}}$ : 13.1 min (*R*),  $T_{\text{minor}}$ : 17.0 min (*S*)] provided the product with (70% ee).  $[\alpha]_{\text{D}} = -14.4$  ( $c = 1.0$ ,  $\text{CHCl}_3$ ); IR (thin film): 3411, 1674, 1518  $\text{cm}^{-1}$ ;  $^1\text{H}$  NMR (300 MHz,  $\text{CDCl}_3$ )  $\delta$  8.81 (d,  $J = 5.1$  Hz, 1H), 8.54 (d,  $J = 0.6$  Hz, 1H), 7.94-7.90 (m, 3H), 7.53-7.41 (m, 3H), 7.27 (d,  $J = 9.0$  Hz, 1H), 7.11-7.06 (m, 3H), 6.68-6.65 (m, 2H), 5.74 (s, 1H), 2.23 (s, 3H), 1.07 (s, 3H), 1.03 (s, 3H);  $^{13}\text{C}$  NMR (100 MHz,  $\text{CDCl}_3$ )  $\delta$  163.9, 151.7, 149.9, 145.5, 143.0, 135.0, 132.7, 132.01, 131.97, 131.1, 129.0, 128.7, 128.4, 128.0, 127.4, 126.4, 125.8, 124.6, 124.2, 123.1, 55.4, 27.9, 27.6, 20.7.

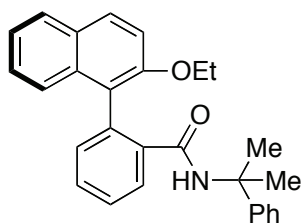

**(S)-2-(2-ethoxy-1-naphthyl)-N-(2-phenyl-2-propyl)**

**benzamide** (Table 2, entry e) The reaction was conducted for 40 h according to the general procedure (5 mol% Pd, 6 mol% (S)-KenPhos and 2 equiv of boronic acid). The title product was purified by flash chromatography (eluted with 10% ethyl

acetate in hexanes) gave 327 mg (80%) desire product as a colorless oil. Separation of enantiomers by Chiral HPLC [Daicel Chiracel<sup>®</sup> OD-H column, flow rate 1.0 mL/min, 10% *i*PrOH, 90% hexane,  $T_{\text{major}}$ : 6.4 min (*S*),  $T_{\text{minor}}$ : 7.8 min (*R*)] provided the product with (91% ee).  $[\alpha]_{\text{D}} = +22.9$  ( $c = 0.48$ ,  $\text{CHCl}_3$ ); IR (thin film): 3418, 2979, 1667, 1510  $\text{cm}^{-1}$ ;  $^1\text{H}$  NMR (400 MHz,  $\text{CDCl}_3$ )  $\delta$  7.94-7.91 (m, 2H), 7.85 (dd,  $J = 6.7, 1.6$  Hz, 1H), 7.53-7.46 (m, 2H), 7.4-7.30 (m, 2H), 7.30 (d,  $J = 9.0$  Hz, 1H), 7.26-7.19 (m, 2H), 7.06-6.97 (m, 3H), 6.72-6.68 (m, 2H), 6.24 (s, 1H), 4.12-3.98 (m, 2H), 1.21 (t,  $J = 7.0$  Hz, 3H), 1.21 (s, 3H), 1.11 (s, 3H);  $^{13}\text{C}$  NMR (100 MHz,  $\text{CDCl}_3$ )  $\delta$  167.0, 152.7, 146.3, 137.7, 133.8, 133.5, 131.5, 129.9, 129.8, 129.2, 129.0, 127.9, 127.8, 127.2, 126.1, 125.0, 124.4, 124.10, 124.08, 114.3, 64.9, 55.3, 28.9, 27.4, 15.0. Elemental analysis for  $\text{C}_{28}\text{H}_{27}\text{NO}_2$ : C, 82.12; H, 6.65. Found: C, 81.86; H, 6.77.

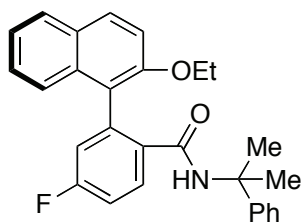

**(S)-2-(2-ethoxy-1-naphthyl)-4-fluoro-N-(2-phenyl-2-**

**propyl)benzamide** (Table 2, entry g) The reaction was conducted for 40 h according to the general procedure (5 mol% Pd, 6 mol% (S)-KenPhos and 2 equiv of boronic acid). The title product was purified by flash chromatography (eluted

with 9% ethyl acetate in hexanes) gave 346 mg (81%) desire product as a colorless oil. Separation of enantiomers by Chiral HPLC [Daicel Chiracel<sup>®</sup> OD-H column, flow rate 1.0 mL/min, 10% *i*PrOH, 90% hexane,  $T_{\text{major}}$ : 6.6 min (*S*),  $T_{\text{minor}}$ : 8.2 min (*R*)] provided the product with (90% ee).  $[\alpha]_{\text{D}} = +19.6$  ( $c = 0.35$ ,  $\text{CHCl}_3$ ); IR (thin film): 3419, 2979, 1667, 1512  $\text{cm}^{-1}$ ;  $^1\text{H}$  NMR (300 MHz,  $\text{CDCl}_3$ )  $\delta$  7.99-7.94 (m, 2H), 7.89-7.86 (m, 1H), 7.43-7.38 (m, 2H), 7.32 (d,  $J = 9.0$  Hz, 1H), 7.27-7.16 (m, 2H), 7.09-6.98 (m, 3H), 6.94 (dd,  $J = 9.3, 2.7$  Hz, 1H), 6.73-6.70 (m, 2H), 6.17 (s, 1H), 4.17-4.00 (m, 2H), 1.26 (t,  $J = 7.2$  Hz, 3H), 1.19 (s, 3H), 1.11 (s, 3H);  $^{13}\text{C}$  NMR (75 MHz,  $\text{CDCl}_3$ )  $\delta$  165.9, 163.4 (d,  $J = 248.9$  Hz), 152.6, 146.2, 136.2 (d,  $J = 8.7$  Hz), 133.8 (d,  $J = 3.1$  Hz), 133.4, 131.7 (d,  $J = 8.7$  Hz), 130.3, 128.9, 127.94, 127.91, 127.5, 126.2, 124.6, 124.4, 124.2, 122.7, 118.2 (d,  $J$



= 21.1 Hz), 114.9 (d,  $J = 20.9$  Hz), 114.1, 64.8, 55.4, 28.8, 27.4, 14.9.  $^{19}\text{F}$  NMR (282 MHz,  $\text{CDCl}_3$ )  $\delta$  -111.4. Elemental analysis for  $\text{C}_{28}\text{H}_{26}\text{FNO}_2$ : C, 78.66; H, 6.13. Found: C, 78.39; H, 6.10.

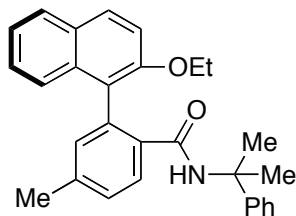

**(S)-2-(2-ethoxy-1-naphthyl)-4-methyl-N-(2-phenyl-2-propyl)benzamide** (Table 2, entry i) The reaction was conducted for 40 h according to the general procedure (5 mol% Pd, 6 mol% (*S*)-KenPhos and 2 equiv of boronic acid). The title

product was purified by flash chromatography (eluted with 10% ethyl acetate in hexanes) gave 343 mg (81%) desire product as a colorless oil.  $[\alpha]_{\text{D}} = +43.1$  ( $c = 1.40$ ,  $\text{CHCl}_3$ ); Separation of enantiomers by Chiral HPLC [Daicel Chiracel<sup>®</sup> OD-H column, flow rate 1.0 mL/min, 5% *i*PrOH, 95% hexane,  $T_{\text{major}}$ : 8.6 min,  $T_{\text{minor}}$ : 10.4 min] provided the product with (92% ee). IR (thin film): 3418, 2978, 1664, 1511  $\text{cm}^{-1}$ ;  $^1\text{H}$  NMR (300 MHz,  $\text{CDCl}_3$ )  $\delta$  7.93 (d,  $J = 9.3$  Hz, 1H); 7.88-7.85 (m, 2H), 7.40-7.26 (m, 6H), 7.05-6.98 (m, 4H), 6.73-6.70 (m, 2H), 6.20 (s, 1H), 4.15-4.02 (m, 2H), 2.41 (s, 3H), 1.26 (t,  $J = 7.2$  Hz, 3H), 1.21 (s, 3H), 1.11 (s, 3H);  $^{13}\text{C}$  NMR (100 MHz,  $\text{CDCl}_3$ )  $\delta$  167.0, 152.7, 146.4, 140.0, 134.7, 133.8, 133.4, 132.0, 129.7, 129.4, 129.0, 128.6, 128.4, 127.85, 127.8, 127.2, 126.1, 125.0, 124.4, 124.2, 124.0, 114.3, 64.8, 55.2, 28.9, 27.5, 21.3, 15.0. Elemental analysis for  $\text{C}_{29}\text{H}_{29}\text{NO}_2$ : C, 82.24; H, 6.90. Found: C, 81.76; H, 6.86.

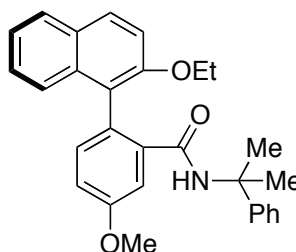

**(S)-2-(2-ethoxy-1-naphthyl)-5-methoxy-N-(2-phenyl-2-propyl)benzamide** (Table 2, entry l) The reaction was conducted for 40 h according to the general procedure (5 mol% Pd, 6 mol% (*S*)-KenPhos and 2 equiv of boronic acid). The title product was purified by flash chromatography (eluted

with 20% ethyl acetate in hexanes) gave 369 mg (84%) desire product as a white solid. MP = 112-114 °C. Separation of enantiomers by Chiral HPLC [Daicel Chiracel<sup>®</sup> OD-H column, flow rate 1.0 mL/min, 10% *i*PrOH, 90% hexane,  $T_{\text{major}}$ : 6.4 min (*S*),  $T_{\text{minor}}$ : 7.7 min (*R*)] provided the product with (91% ee).  $[\alpha]_{\text{D}} = +18.7$  ( $c = 0.44$ ,  $\text{CHCl}_3$ ); IR (thin film): 3416, 1667, 1508  $\text{cm}^{-1}$ ;  $^1\text{H}$  NMR (400 MHz,  $\text{CDCl}_3$ )  $\delta$  7.89 (d,  $J = 9.0$  Hz, 1H), 7.84-7.81 (m, 1H), 7.47 (d,  $J = 2.6$  Hz, 1H), 7.37-7.32 (m, 4H), 7.04-6.87 (m, 5H), 6.71-6.68 (m,

2H), 6.25 (s, 1H), 4.11-3.97 (m, 2H), 3.89 (s, 3H), 1.22 (t,  $J = 7.0$  Hz, 3H), 1.17 (s, 3H), 1.08 (s, 3H);  $^{13}\text{C}$  NMR (100 MHz,  $\text{CDCl}_3$ )  $\delta$  166.7, 159.0, 153.0, 146.3, 138.5, 134.2, 132.7, 129.7, 129.0, 127.9, 127.8, 127.2, 126.1, 125.6, 125.0, 124.4, 124.0, 123.8, 117.2, 114.4, 113.0, 64.8, 55.4, 55.3, 28.7, 27.5, 15.0. Elemental analysis for  $\text{C}_{29}\text{H}_{29}\text{NO}_3$ : C, 79.24; H, 6.65. Found: C, 79.17; H, 6.65.

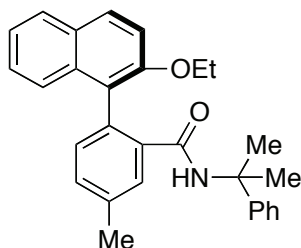

**(*R*)-2-(2-ethoxy-1-naphthyl)-5-methyl-N-(2-phenyl-2-propyl)benzamide:** The reaction was conducted for 40 h according to the general procedure (5 mol% Pd, 6 mol% (*R*)-KenPhos and 2 equiv of boronic acid). The title product was purified by flash chromatography (eluted with 9% ethyl acetate

in hexanes) gave 360 mg (85% containing about 5% impurity) desire product as a colorless oil. Separation of enantiomers by Chiral HPLC [Daicel Chiracel<sup>®</sup> OD-H column, flow rate 1.0 mL/min, 5% *i*PrOH, 95% hexane,  $T_{\text{minor}}$ : 8.2 min (*S*),  $T_{\text{major}}$ : 10.3 min (*R*)] provided the product with (90% ee).  $[\alpha]_{\text{D}} = -22.1$  ( $c = 0.69$ ,  $\text{CHCl}_3$ ); IR (thin film): 3419, 1667, 1512  $\text{cm}^{-1}$ ;  $^1\text{H}$  NMR (300 MHz,  $\text{CDCl}_3$ )  $\delta$  7.92 (d,  $J = 9.0$  Hz, 1H), 7.87-7.84 (m, 1H), 7.76-7.75 (m, 1H), 7.40-7.25 (m, 5H), 7.11 (d,  $J = 7.8$  Hz, 1H), 7.05-6.97 (m, 3H), 6.73-6.70 (m, 2H), 6.23 (s, 1H), 4.16-3.98 (m, 2H), 2.47 (s, 3H), 1.24 (t,  $J = 7.2$  Hz, 3H), 1.21 (s, 3H), 1.11 (s, 3H);  $^{13}\text{C}$  NMR (75 MHz,  $\text{CDCl}_3$ )  $\delta$  167.2, 152.8, 146.4, 137.6, 137.4, 134.0, 131.4, 130.8, 130.5, 129.73, 129.67, 129.0, 127.9, 127.8, 127.1, 126.1, 125.0, 124.4, 124.1, 124.0, 114.4, 64.8, 55.3, 28.9, 27.5, 21.2, 15.0.

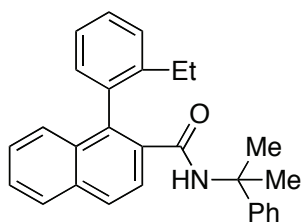

**1-(2-ethylphenyl)-N-(2-phenyl-2-propyl)-2-naphthamide** (Scheme 3, entry a) The reaction was conducted at room temperature for 30 h according to the general (5 mol% Pd, 6 mol% (*R*)-KenPhos and 2 equiv of boronic acid). The title product was purified by flash chromatography (eluted with 9%

ethyl acetate in hexanes) gave 315 mg (80%) desire product as a white solid. MP = 109-111 °C. Separation of enantiomers by Chiral HPLC [Daicel Chiracel<sup>®</sup> OD-H column, flow rate 1.0 mL/min, 3% *i*PrOH, 97% hexane,  $T_{\text{major}}$ : 12.3 min,  $T_{\text{minor}}$ : 14.2 min] provided the product with (88% ee).  $[\alpha]_{\text{D}} = -8.6$  ( $c = 0.94$ ,  $\text{CHCl}_3$ ); IR (thin film): 3417, 2970, 1653, 1506  $\text{cm}^{-1}$ ;  $^1\text{H}$  NMR (300 MHz,  $\text{CDCl}_3$ )  $\delta$  8.00 (d,  $J = 8.7$  Hz, 1H), 7.91 (t,  $J = 7.8$  Hz,

2H), 7.55-7.50 (m, 3H), 7.42-7.36 (m, 3H), 7.29-7.19 (m, 4H), 7.13-7.10 (m, 2H), 5.82 (s, 1H), 2.32 (q,  $J = 7.5$  Hz, 2H), 1.41 (s, 3H), 1.38 (s, 3H), 0.97 (t,  $J = 7.5$  Hz, 3H);  $^{13}\text{C}$  NMR (75 MHz,  $\text{CDCl}_3$ )  $\delta$  167.0, 146.4, 143.1, 137.4, 136.0, 134.2, 132.8, 132.2, 130.3, 130.0, 128.8, 128.1, 128.0, 127.9, 127.1, 126.9, 126.46, 126.42, 126.40, 126.0, 124.7, 55.6, 28.6, 28.2, 26.1, 14.4. Elemental analysis for  $\text{C}_{28}\text{H}_{27}\text{NO}$ : C, 85.46; H, 6.92. Found: C, 85.00; H, 6.86.

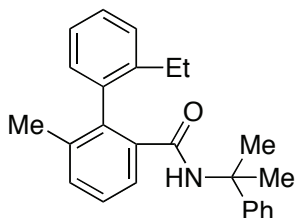

**2'-ethyl-6-methyl-N-(2-phenyl-2-propyl)-[1,1'-biphenyl]-2-carboxamide** (Scheme 3, entry c) The reaction was conducted at room temperature for 30 h according to the general procedure (5 mol% Pd, 6 mol% (*R*)-KenPhos and 2 equiv of boronic acid). The title product was purified by flash

chromatography (eluted with 9% ethyl acetate in hexanes) gave 250 mg (70%) desired product as a white solid. Separation of enantiomers by Chiral HPLC [Daicel Chiralcel<sup>®</sup> OD-H column, flow rate 1.0 mL/min, 3% *i*PrOH, 97% hexane,  $T_{\text{major}}$ : 9.7 min,  $T_{\text{minor}}$ : 11.1 min] provided the product with (81% ee).  $[\alpha]_{\text{D}} = +11.8$  ( $c = 0.82$ ,  $\text{CHCl}_3$ ); IR (thin film): 3418, 2978, 1664, 1510  $\text{cm}^{-1}$ ;  $^1\text{H}$  NMR (400 MHz,  $\text{CDCl}_3$ )  $\delta$  7.72-7.70 (m, 1H), 7.41-7.38 (m, 2H), 7.36-7.26 (m, 3H), 7.23-7.17 (m, 3H), 7.15-7.10 (m, 2H), 7.05-7.03 (m, 1H), 5.63 (s, 1H), 2.34 (q,  $J = 7.7$  Hz, 2H), 1.98 (s, 3H), 1.33 (s, 3H), 1.27 (s, 3H), 1.02 (td,  $J = 7.5, 0.9$  Hz, 3H);  $^{13}\text{C}$  NMR (100 MHz,  $\text{CDCl}_3$ )  $\delta$  167.0, 146.4, 142.1, 138.7, 137.7, 136.6, 136.0, 131.9, 129.2, 129.0, 128.4, 128.1, 127.6, 127.1, 126.5, 126.3, 124.7, 55.5, 28.7, 28.1, 25.9, 20.6, 14.1. Elemental analysis for  $\text{C}_{25}\text{H}_{27}\text{NO}$ : C, 83.99; H, 7.61. Found: C, 83.73; H, 7.65.

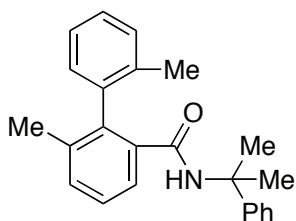

**2',6-dimethyl-N-(2-phenyl-2-propyl)-[1,1'-biphenyl]-2-carboxamide** (Scheme 3, entry d) The reaction was conducted at room temperature for 30 h according to the general procedure (5 mol% Pd, 6 mol% (*S*)-KenPhos and 2 equiv of boronic acid). The title product was purified by flash

chromatography (eluted with 9% ethyl acetate in hexanes) gave 307 mg product which contains about 20 mol% (by  $^1\text{H}$  NMR) of inseparable

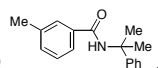

Separation of enantiomers by Chiral HPLC [Daicel Chirapak<sup>®</sup> AD-H column, flow rate 1.0 mL/min, 2% *i*PrOH, 98% hexane,  $T_{\text{minor}}$ : 36.3 min,  $T_{\text{major}}$ : 39.2 min] provided the product with (80% ee).  $[\alpha]_{\text{D}} = -3.0$  ( $c = 0.40$ ,  $\text{CHCl}_3$ ); IR (thin film): 3416, 2973, 1653, 761  $\text{cm}^{-1}$ ;  $^1\text{H}$  NMR (300 MHz,  $\text{CDCl}_3$ )  $\delta$  7.70 (dd,  $J = 7.2, 2.1$  Hz, 1H), 7.38-7.29 (m, 5H), 7.26-7.16 (m, 4H), 7.11-7.07 (m, 2H), 5.66 (s, 1H), 2.05 (s, 3H), 2.00 (s, 3H), 1.37 (s, 3H), 1.34 (s, 3H);  $^{13}\text{C}$  NMR (75 MHz,  $\text{CDCl}_3$ )  $\delta$  167.2, 146.4, 139.2, 137.9, 136.42, 136.37, 136.1, 131.8, 130.8, 129.1, 128.1, 128.08, 127.5, 126.8, 126.5, 126.4, 124.6, 55.5, 28.6, 28.1, 20.4, 19.8.

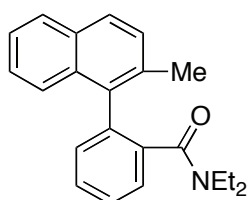

**N,N-diethyl-2-(2-methyl-1-naphthyl)benzamide** (Table 1, entry c)

The reaction was conducted for 24 h according to the general procedure (0.20 mmol ArOTf as representative starting material) using (*R*)-KenPhos as ligand. The title product was purified by flash chromatography (eluted with 5% ethyl acetate in hexanes to 15% ethyl acetate in hexanes) gave 54 mg (85%) desired product as a white solid. MP = 135.0-137.0 °C. Separation of enantiomers by Chiral HPLC [Daicel Chiralcel<sup>®</sup> AD-H column, flow rate 1.0 mL/min, 5% *i*PrOH, 95% hexane,  $T_{\text{minor}}$ : 8.8 min,  $T_{\text{major}}$ : 11.7 min] provided the product with (71% ee).  $[\alpha]_{\text{D}} = +60.6$  ( $c = 0.57$ ,  $\text{CHCl}_3$ ); IR (thin film): 2972, 1633, 1427  $\text{cm}^{-1}$ ;  $^1\text{H}$  NMR (300 MHz,  $\text{CDCl}_3$ )  $\delta$  7.56 (d,  $J = 7.5$  Hz, 1H), 7.51 (d,  $J = 8.4$  Hz, 1H), 7.30-7.19 (m, 3H), 7.16-7.06 (m, 5H), 3.25 (br, 1H), 2.93 (br, 1H), 2.32 (br, 2H), 2.08 (s, 3H), 0.63 (s, 3H), 0.02 (t,  $J = 6.9$  Hz, 3H);  $^{13}\text{C}$  NMR (75 MHz,  $\text{CDCl}_3$ )  $\delta$  169.4, 137.8, 136.8, 135.0, 131.6, 131.1, 128.5, 127.7, 127.4, 127.3, 126.1, 125.2, 124.4, 42.6, 37.5, 21.1, 13.7, 11.2. Elemental analysis for  $\text{C}_{22}\text{H}_{23}\text{NO}$ : C, 83.24; H, 7.30. Found: C, 82.74; H, 7.34.

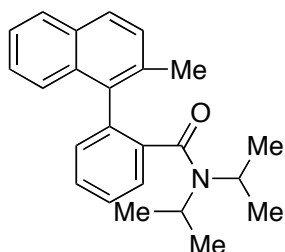

**N,N-diisopropyl-2-(2-methyl-1-naphthyl)benzamide** (Table

1, entry d) The reaction was conducted for 36 h according to the general procedure (0.20 mmol) using (*R*)-KenPhos as ligand. The title product was purified by flash chromatography (eluted with 5% ethyl acetate in hexanes to 10% ethyl acetate in hexanes) gave 53 mg (76%) desired product as a colorless oil. Separation of enantiomers by Chiral HPLC [Daicel Chiralcel<sup>®</sup> AD-H column, flow rate 1.0 mL/min, 5% *i*PrOH, 95% hexane,  $T_{\text{minor}}$ : 5.2 min,  $T_{\text{major}}$ : 6.8 min] provided the product with (82% ee).  $[\alpha]_{\text{D}} = +67.6$

( $c = 1.55$ ,  $\text{CHCl}_3$ ); IR (thin film): 2967, 1632, 1338  $\text{cm}^{-1}$ ;  $^1\text{H}$  NMR of major rotamer (300 MHz,  $\text{CDCl}_3$ )  $\delta$  7.82 (d,  $J = 7.2$  Hz, 1H), 7.75 (d,  $J = 8.7$  Hz, 1H), 7.50-7.44 (m, 2H), 7.41-7.28 (m, 6H), 3.68-3.56 (m, 1H), 3.08-2.96 (m, 1H), 2.36 (s, 3H), 1.39 (d,  $J = 6.9$  Hz, 3H), 0.95 (d,  $J = 6.6$  Hz, 3H), 0.78 (d,  $J = 6.9$  Hz, 3H), -0.01 (d,  $J = 6.6$  Hz, 3H);  $^{13}\text{C}$  NMR (75 MHz,  $\text{CDCl}_3$ )  $\delta$  169.3, 139.2, 135.9, 134.9, 132.6, 131.6, 131.2, 128.7, 127.95, 127.86, 127.5, 127.3, 126.2, 125.8, 125.3, 124.2, 50.0, 45.1, 21.4, 21.1, 20.4, 19.7, 19.5. Elemental analysis for  $\text{C}_{24}\text{H}_{27}\text{NO}$ : C, 83.44; H, 7.88. Found: C, 83.42; H, 7.98.

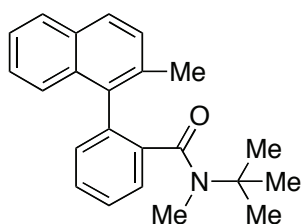

**N-(tert-butyl)-N-methyl-2-(2-methyl-1-naphthyl)benzamide**

(Table 1, entry e) The reaction was conducted for 36 h according to the general procedure (0.20 mmol) using (*R*)-KenPhos as ligand. The title product was purified by flash chromatography (eluted with 5% ethyl acetate in hexanes to

10% ethyl acetate in hexanes) gave 54 mg (82%) desire product as a white solid. MP = 94 °C (dec.). Separation of enantiomers by Chiral HPLC [Daicel Chiracel<sup>®</sup> AD-H column, flow rate 1.0 mL/min, 1% *i*PrOH, 99% hexane,  $T_{\text{minor}}$ : 13.7 min,  $T_{\text{major}}$ : 15.7 min] provided the product with (75% ee).  $[\alpha]_{\text{D}} = +98.1$  ( $c = 0.46$ ,  $\text{CHCl}_3$ ); IR (thin film): 2977, 1637, 1377  $\text{cm}^{-1}$ ;  $^1\text{H}$  NMR (300 MHz,  $\text{CDCl}_3$ )  $\delta$  7.81 (d,  $J = 7.5$  Hz, 1H), 7.76 (d,  $J = 8.4$  Hz, 1H), 7.49-7.30 (m, 8H), 2.41 (s, 3H), 2.29 (s, 3H), 0.87 (s, 9H);  $^{13}\text{C}$  NMR (75 MHz,  $\text{CDCl}_3$ )  $\delta$  171.1, 140.2, 136.1, 135.4, 131.6, 131.1, 128.6, 128.2, 127.6, 127.3, 125.0, 124.5, 55.8, 34.5, 26.9, 21.0. Elemental analysis for  $\text{C}_{23}\text{H}_{25}\text{NO}$ : C, 83.34; H, 7.60. Found: C, 83.26; H, 7.66.

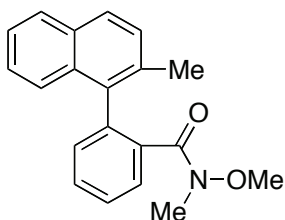

**N-methoxy-N-methyl-2-(2-methyl-1-naphthyl)benzamide**

(Table 1, entry f) The reaction was conducted for 36 h according to the general procedure (0.20 mmol) using (*R*)-KenPhos as ligand. The title product was purified by flash chromatography (eluted with 15% ethyl acetate in hexanes to

25% ethyl acetate in hexanes) gave 46 mg (75%) desire product as a colorless oil. Separation of enantiomers by Chiral HPLC [Daicel Chiracel<sup>®</sup> OD-H column, flow rate 1.0 mL/min, 2% *i*PrOH, 98% hexane,  $T_{\text{minor}}$ : 22.4 min,  $T_{\text{major}}$ : 25.5 min] provided the product

with (80% ee).  $[\alpha]_D = +71.5$  ( $c = 0.95$ ,  $\text{CHCl}_3$ ); IR (thin film): 2932, 1656, 1378  $\text{cm}^{-1}$ ;  $^1\text{H}$  NMR (300 MHz,  $\text{CDCl}_3$ )  $\delta$  7.81 (d,  $J = 7.5$  Hz, 1H), 7.76 (d,  $J = 8.4$  Hz, 1H), 7.58-7.50 (m, 3H), 7.40-7.30 (m, 5H), 3.13 (br, 3H), 2.77 (s, 3H), 2.28 (s, 3H);  $^{13}\text{C}$  NMR (75 MHz,  $\text{CDCl}_3$ )  $\delta$  167.1, 137.2, 136.3, 136.2, 134.0, 132.6, 132.0, 130.6, 130.3, 129.5, 128.8, 128.08, 128.05, 127.9, 126.9, 125.3, 125.1, 50.4, 27.6, 20.5.

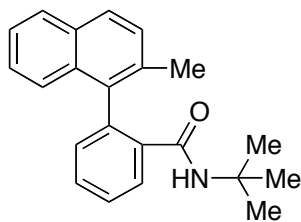

**N-(tert-butyl)-2-(2-methyl-1-naphthyl)benzamide** (Table 1, entry g) The reaction was conducted for 40 h according to the general procedure (0.2 mmol) using (*R*)-KenPhos as ligand. The title product was purified by flash chromatography (eluted with 8% ethyl acetate in hexanes to 15% ethyl acetate

in hexanes) gave 43 mg (68%) desire product as a white solid. MP = 85 °C (dec.). Separation of enantiomers by Chiral HPLC [Daicel Chiracel<sup>®</sup> AD-H column, flow rate 1.0 mL/min, 5% *i*PrOH, 95% hexane,  $T_{\text{minor}}$ : 9.1 min,  $T_{\text{major}}$ : 10.0 min] provided the product with (87% ee).  $[\alpha]_D = +31.7$  ( $c = 0.70$ ,  $\text{CHCl}_3$ ); IR (thin film): 3422, 1664, 1516  $\text{cm}^{-1}$ ;  $^1\text{H}$  NMR (300 MHz,  $\text{CDCl}_3$ )  $\delta$  8.01-7.98 (m, 1H), 7.89-7.85 (m, 1H), 7.84 (d,  $J = 8.7$  Hz, 1H), 7.57-7.50 (m, 2H), 7.46-7.40 (m, 2H), 7.36 (dd,  $J = 6.6, 1.5$  Hz, 1H), 7.34-7.31 (m, 1H), 7.23-7.20 (m, 1H), 5.07 (s, 1H), 2.20 (s, 3H), 0.65 (s, 9H);  $^{13}\text{C}$  NMR (75 MHz,  $\text{CDCl}_3$ )  $\delta$  167.1, 137.2, 136.3, 136.2, 134.0, 132.6, 132.0, 130.6, 130.3, 129.5, 128.8, 128.08, 128.05, 127.9, 126.9, 125.3, 125.1, 50.4, 27.6, 20.5. Elemental analysis for  $\text{C}_{22}\text{H}_{23}\text{NO}$ : C, 83.24; H, 7.30. Found: C, 83.07; H, 7.48.

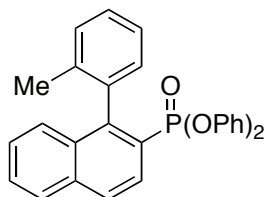

**Diphenyl (1-(o-tolyl)-2-naphthyl)phosphonate** (Scheme 2, entry c) The reaction was conducted at 70 °C in toluene (6 mL/mmol) for 16 h according to the general procedure. The title product was purified by flash chromatography (eluted with 15% to

25% ethyl acetate in hexanes) gave 405 mg (90%) desire product as a white solid. Separation of enantiomers by Chiral HPLC [Daicel Chiracel<sup>®</sup> AD-H column, flow rate 1.0 mL/min, 10% *i*PrOH, 90% hexane,  $T_{\text{major}}$ : 22.4 min,  $T_{\text{minor}}$ : 24.7 min] provided the product with (84% ee).  $^1\text{H}$  NMR (300 MHz,  $\text{CDCl}_3$ )  $\delta$  8.40 (dd,  $J = 12.9, 8.7$  Hz, 1H), 8.06 (dd,  $J = 8.4, 4.2$  Hz, 1H), 7.97 (d,  $J = 8.4$  Hz, 1H), 7.65-7.59 (m, 1H), 7.48-7.19 (m, 10H), 7.12-7.06 (m, 2H), 6.96-6.87 (m, 4H), 1.93 (s, 3H);  $^{13}\text{C}$  NMR (75 MHz,  $\text{CDCl}_3$ ) Due to the

complexity of the spectra all the peaks are listing without take into consideration C-P couplings.  $\delta$  150.36, 150.29, 150.25, 150.17, 145.97, 145.83, 137.74, 137.72, 137.36, 137.29, 135.34, 135.30, 132.53, 132.30, 130.76, 130.74, 129.49, 129.41, 129.40, 129.36, 129.35, 128.42, 128.33, 128.27, 128.24, 128.05, 128.04, 127.7, 127.5, 127.19, 127.17, 127.04, 127.02, 124.98, 124.73, 124.71, 124.64, 124.63, 124.46, 121.89, 120.55, 120.49, 120.36, 120.30, 19.86.  $^{31}\text{P}$  NMR (121 MHz,  $\text{CDCl}_3$ )  $\delta$  12.0. Elemental analysis for  $\text{C}_{29}\text{H}_{23}\text{O}_3\text{P}$ : C, 77.32; H, 5.15. Found: C, 77.10; H, 5.05.

### Deprotection of Cumyl Group

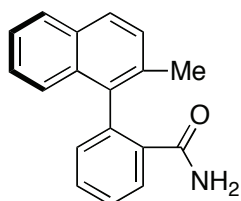

**(*R*)-2-(2-methyl-1-naphthyl)benzamide** (Figure 4) A vial containing 53 mg of **(*R*)-2-(2-methyl-1-naphthyl)-*N*-(2-phenyl-2-propyl) benzamide** (0.14 mmol, 93% ee) and a stir bar was cooled down to 0 °C, 3.0 mL of ice-cold TFA was added, then the reaction mixture was warmed to room temperature and stirred for 2.5 h. The resulting mixture was then concentrated with the aid of a rotary evaporator. The resulting residue was diluted with ether (30 mL) and washed with sat.  $\text{NaHCO}_3$  and brine. The organic layer was dried, concentrated. The title product was purified by flash column chromatography (eluted with 30% ethyl acetate in hexanes) gave 35 mg (96%) as a white solid. MP = 110-112 °C. Separation of enantiomers by Chiral HPLC [Daicel Chiracel<sup>®</sup> OD-H column, flow rate 1.0 mL/min, 10% *i*PrOH, 90% hexane,  $T_{\text{minor}}$ : 9.5 min (*S*),  $T_{\text{major}}$ : 12.1 min (*R*)] provided the product with (93% ee).  $[\alpha]_{\text{D}} = +15.6$  ( $c = 0.50$ ,  $\text{CHCl}_3$ ); IR (thin film): 3467, 3120, 1669, 1594, 1379  $\text{cm}^{-1}$ ;  $^1\text{H}$  NMR (400 MHz,  $\text{CDCl}_3$ )  $\delta$  8.10 (dd,  $J = 7.6, 1.5$  Hz, 1H), 7.81 (dd,  $J = 11.4, 8.3$  Hz, 2H), 7.57-7.48 (m, 2H), 7.42-7.38 (m, 2H), 7.32 (t,  $J = 6.8$  Hz, 1H), 7.26-7.23 (m, 1H), 7.15-7.14 (m, 1H), 5.81 (s, 1H), 5.21 (s, 1H), 2.16 (s, 3H);  $^{13}\text{C}$  NMR (100 MHz,  $\text{CDCl}_3$ )  $\delta$  169.6, 137.3, 135.8, 134.0, 133.9, 132.2, 132.0, 131.3, 131.1, 130.2, 128.8, 128.2, 128.1, 128.0, 126.8, 125.4, 125.1, 20.5. Elemental analysis for  $\text{C}_{18}\text{H}_{15}\text{NO}$ : C, 82.73; H, 5.79. Found: C, 82.54; H, 5.83.

Part III. Compound characterization data including several representative chiral HPLC spectra.

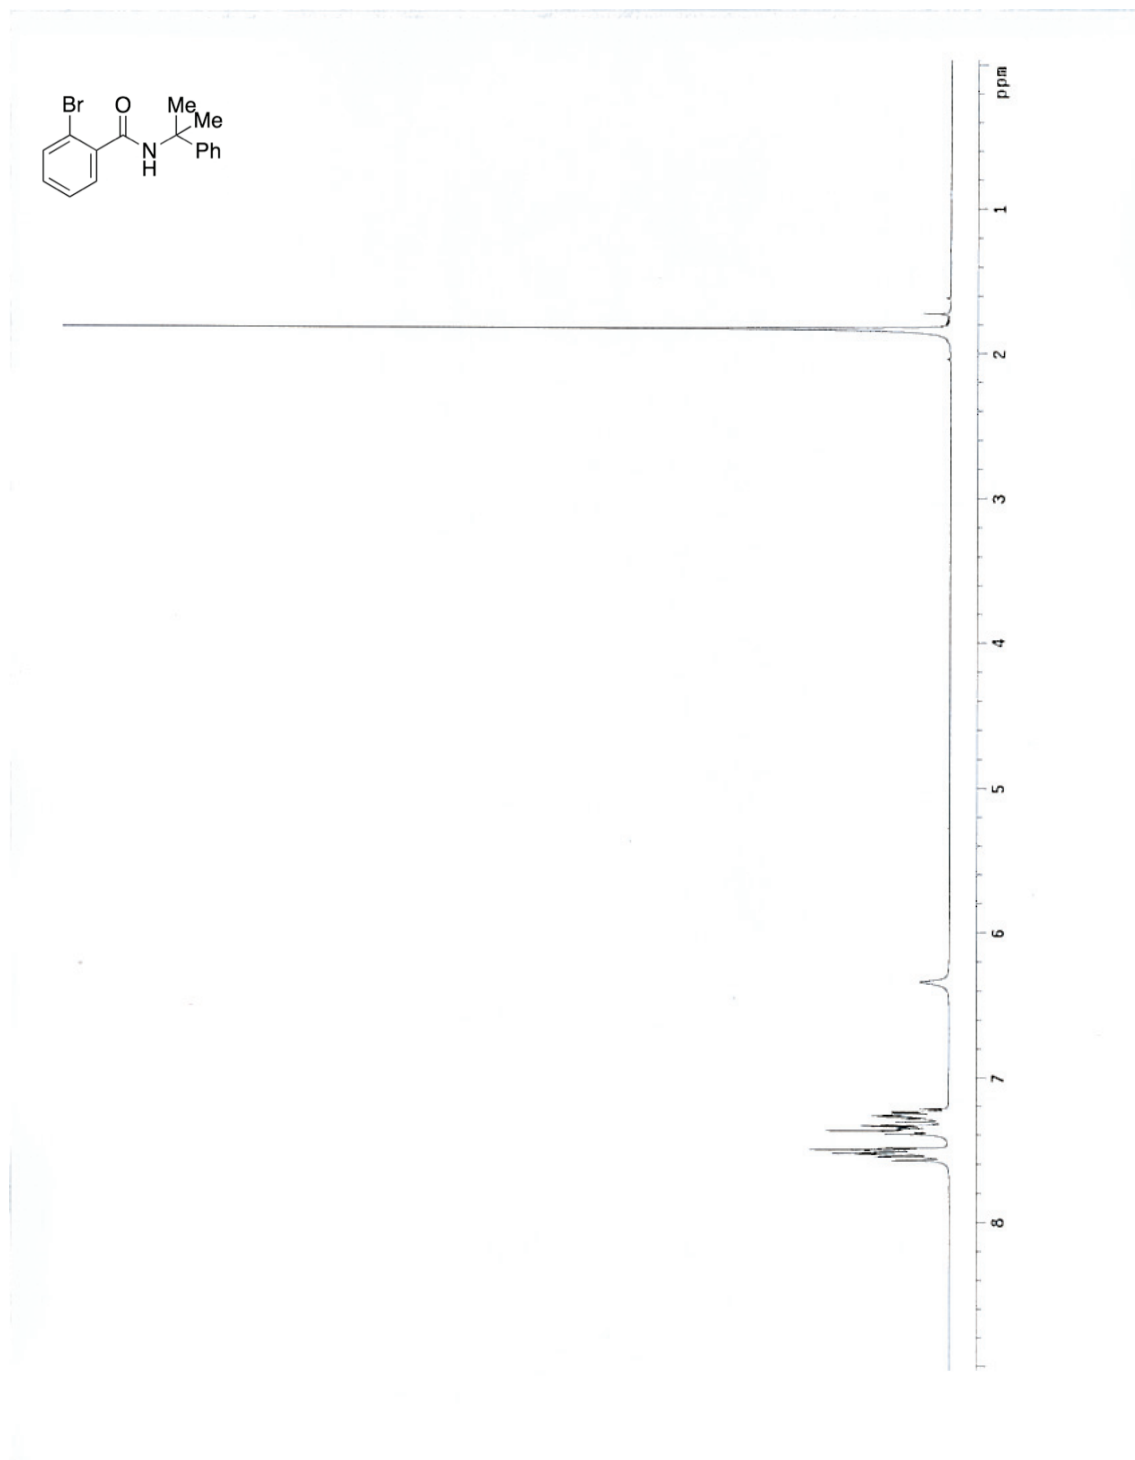



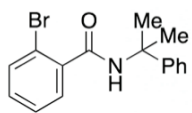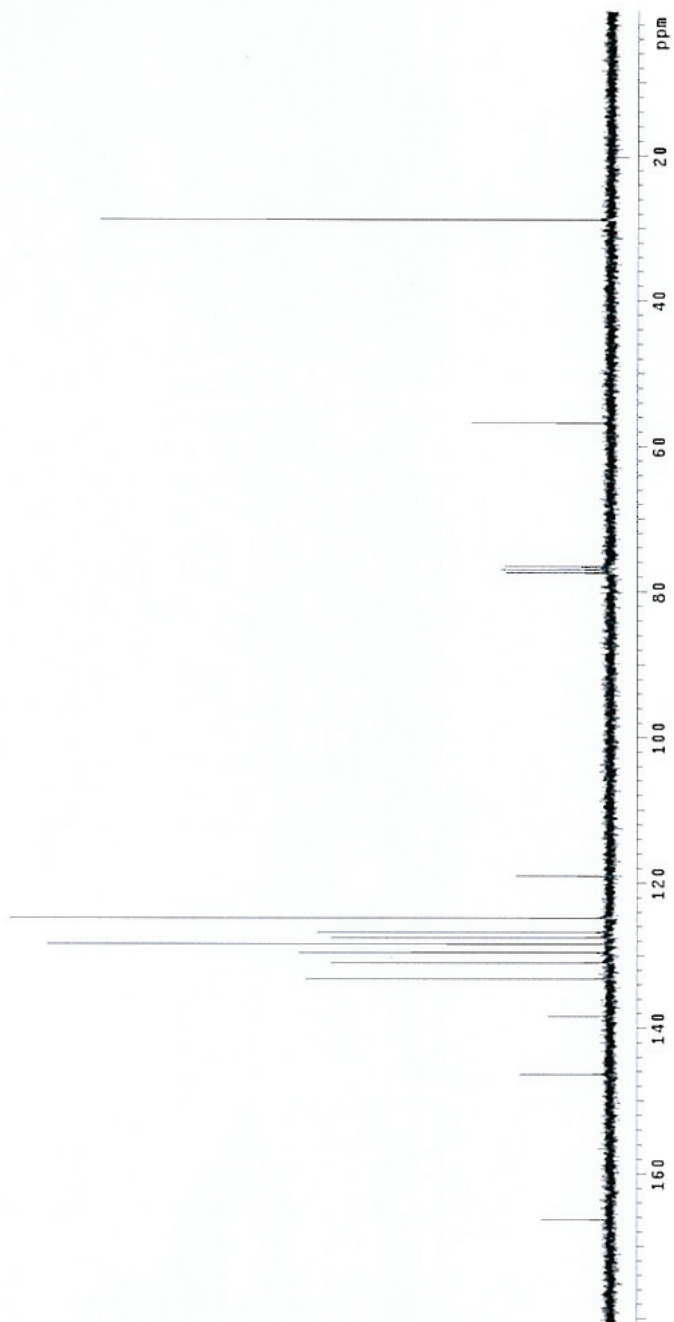

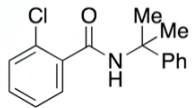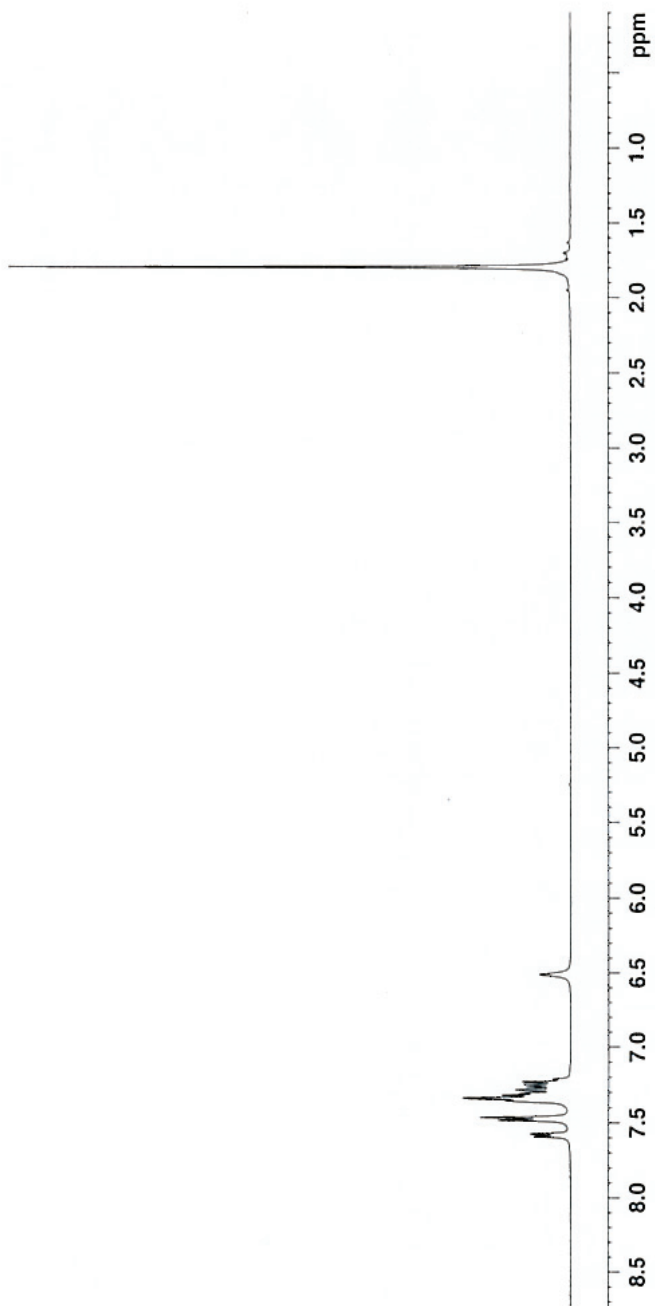

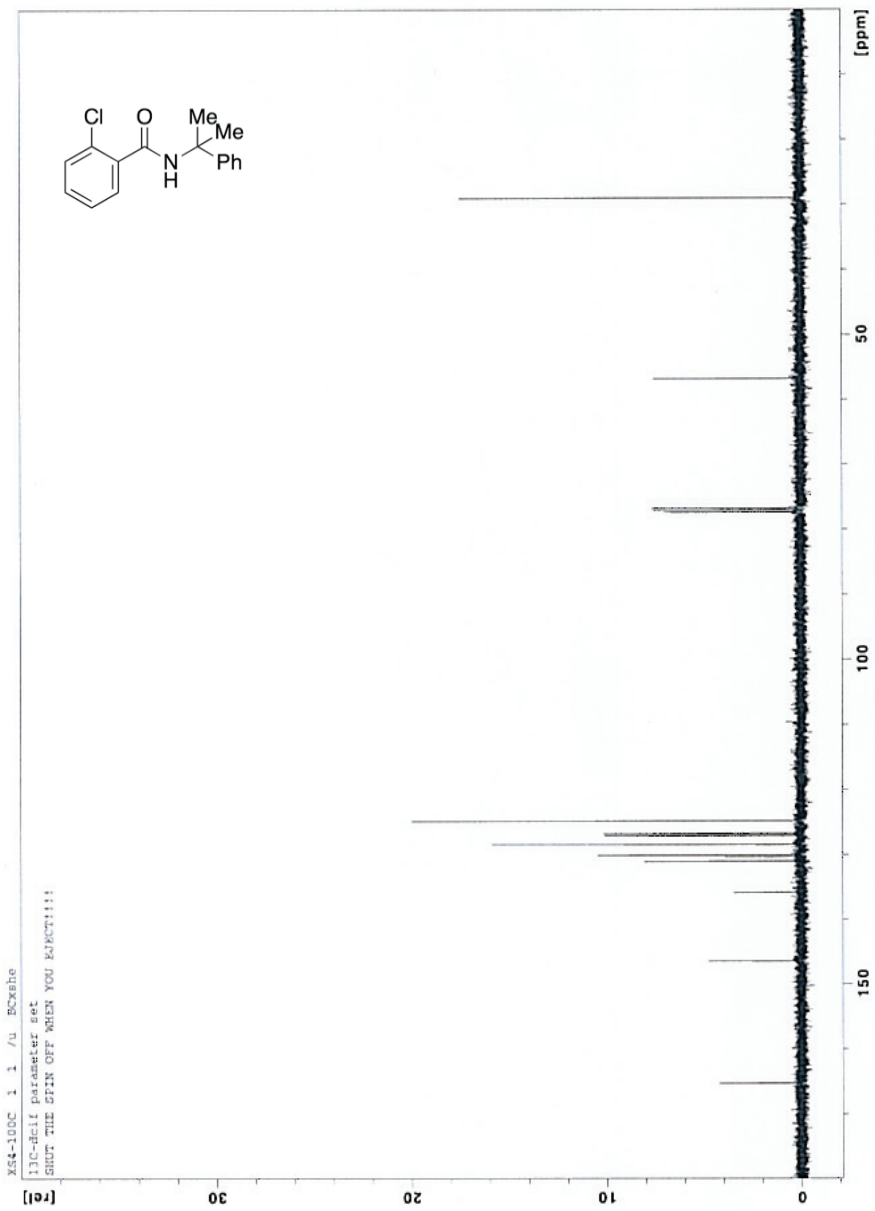

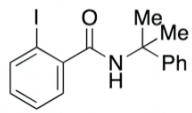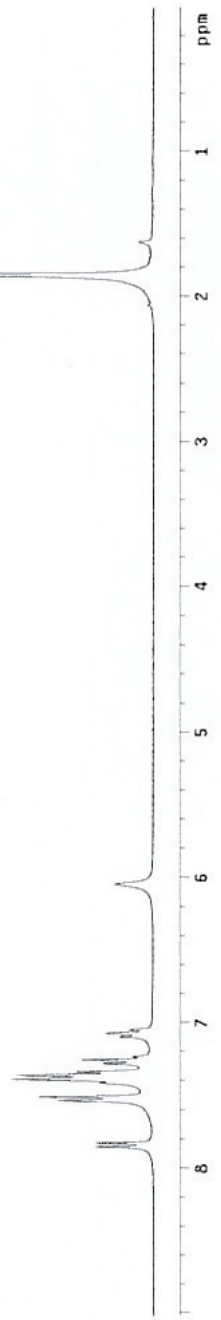

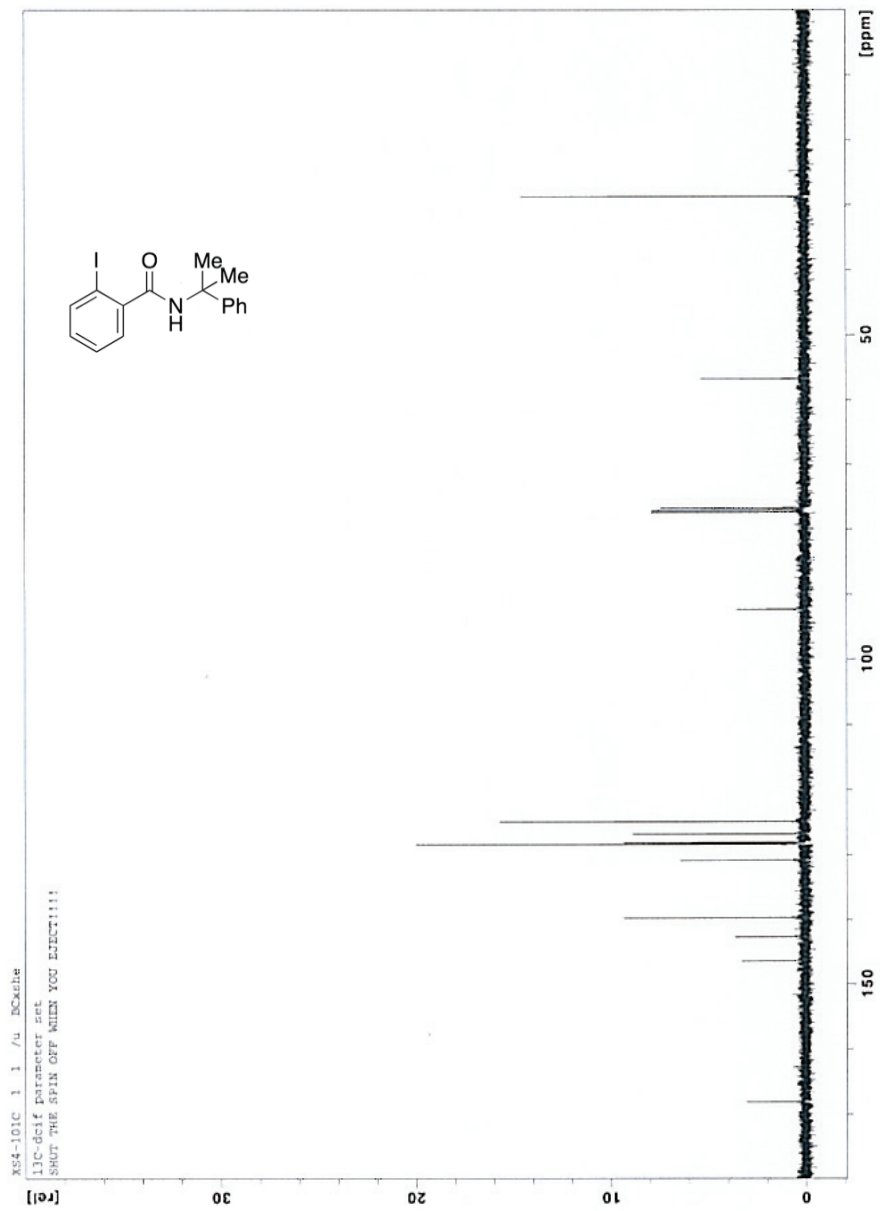

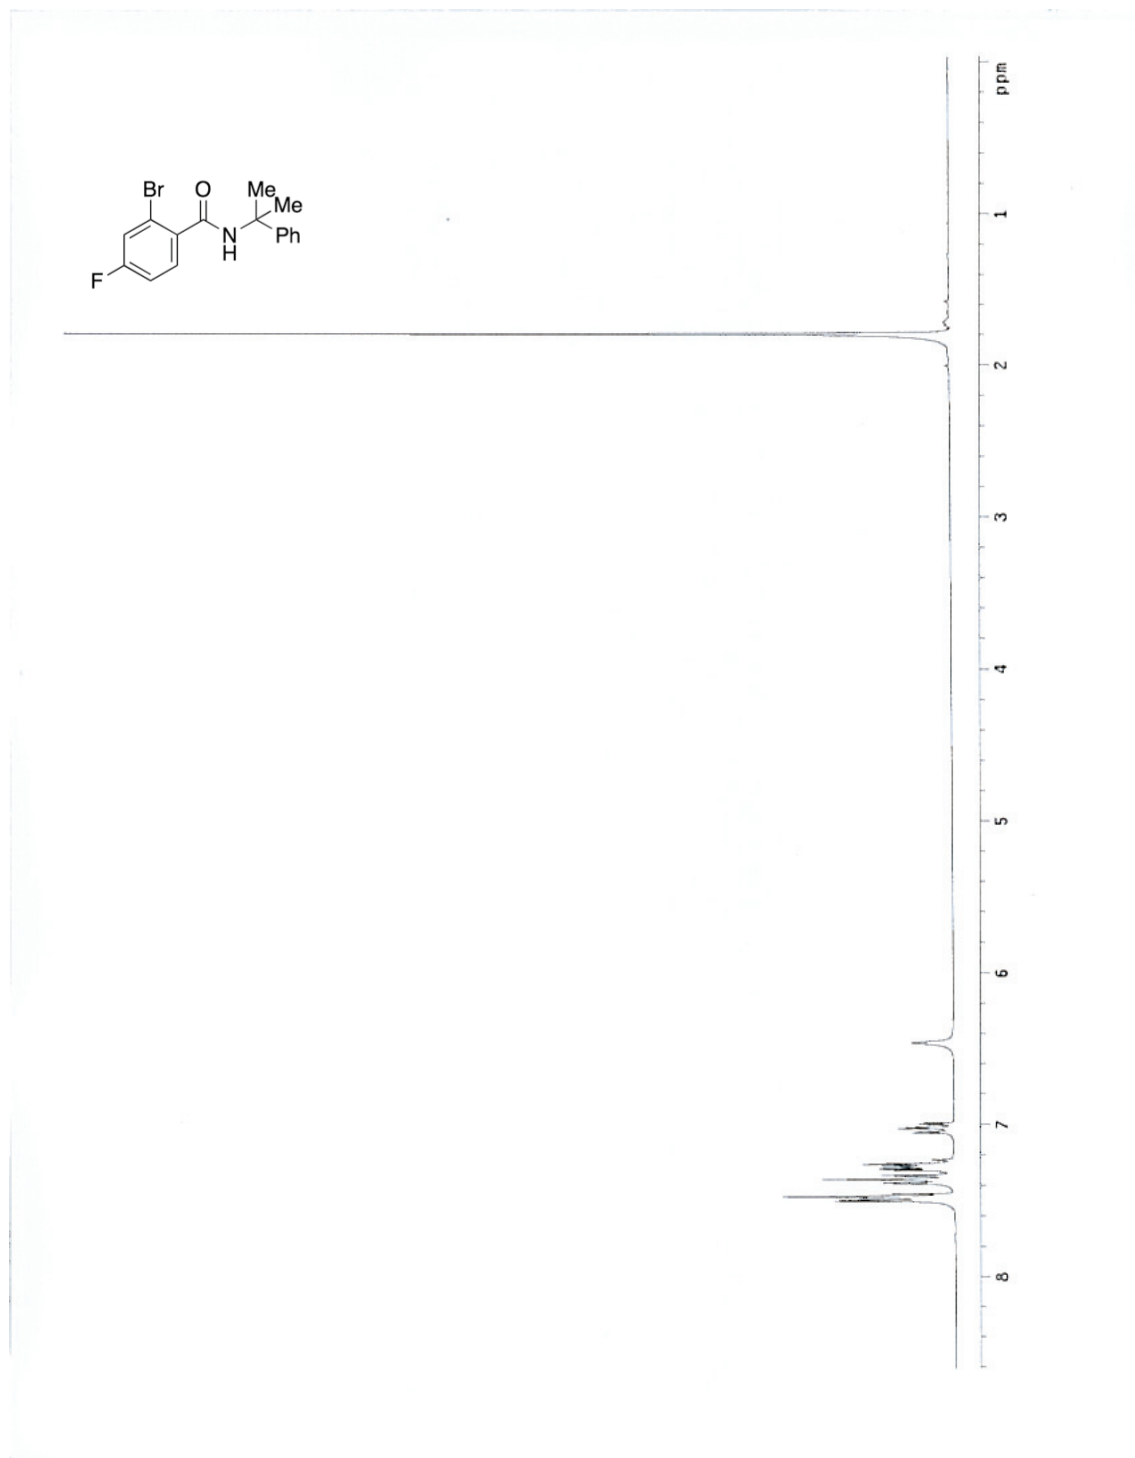

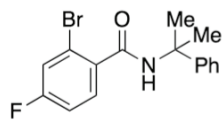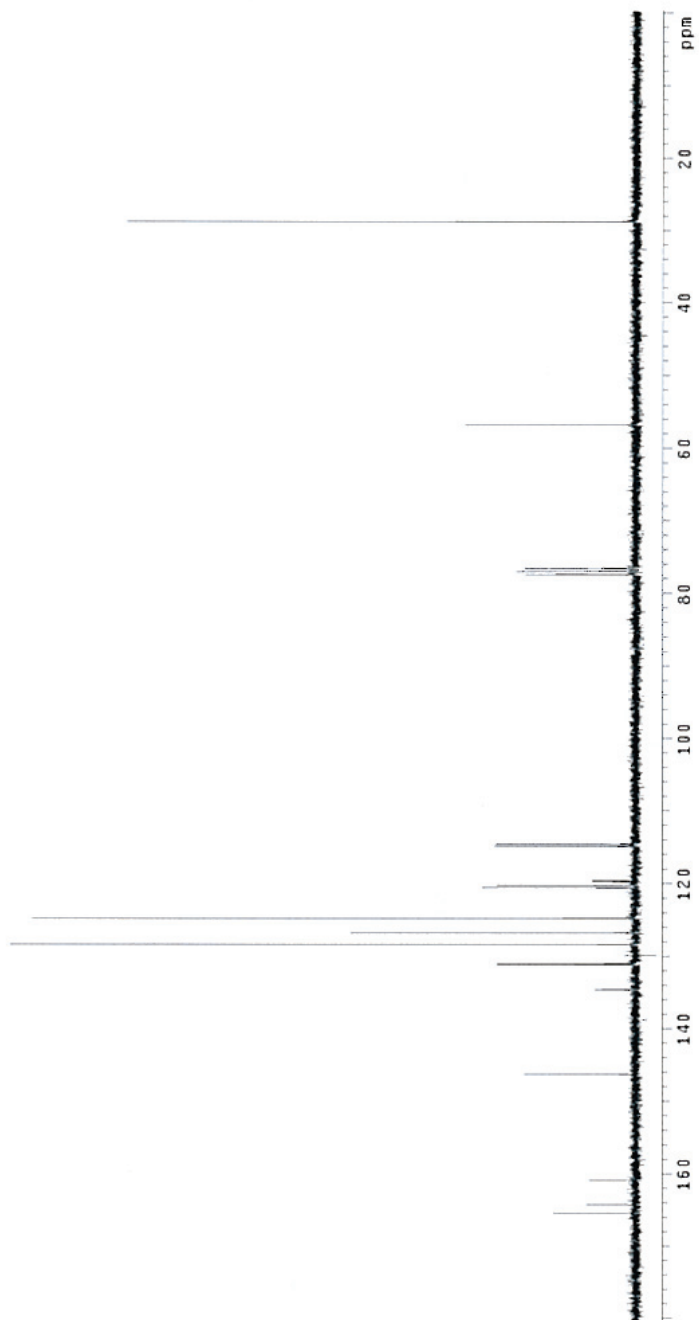

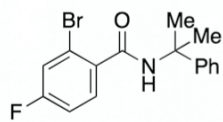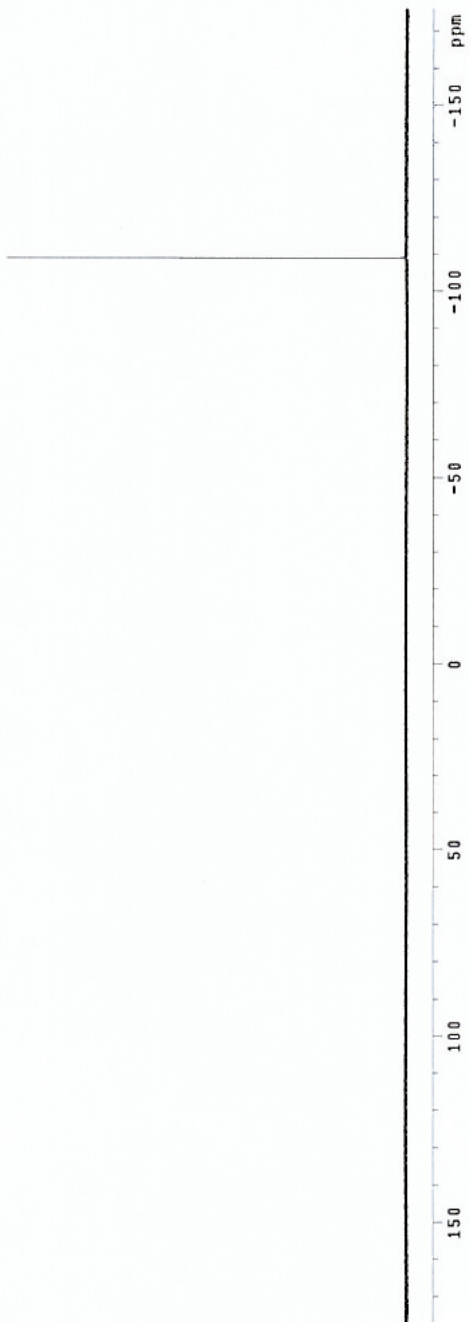



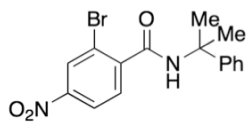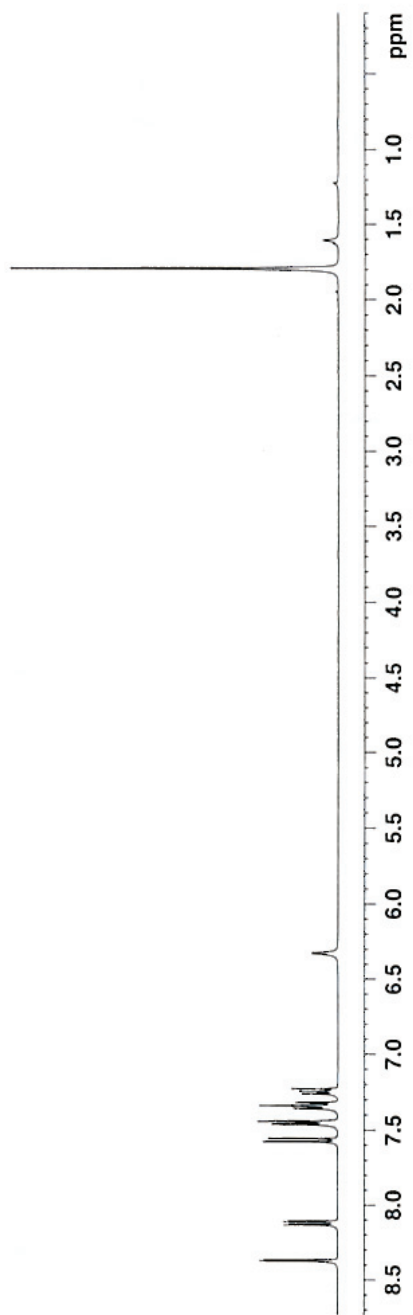

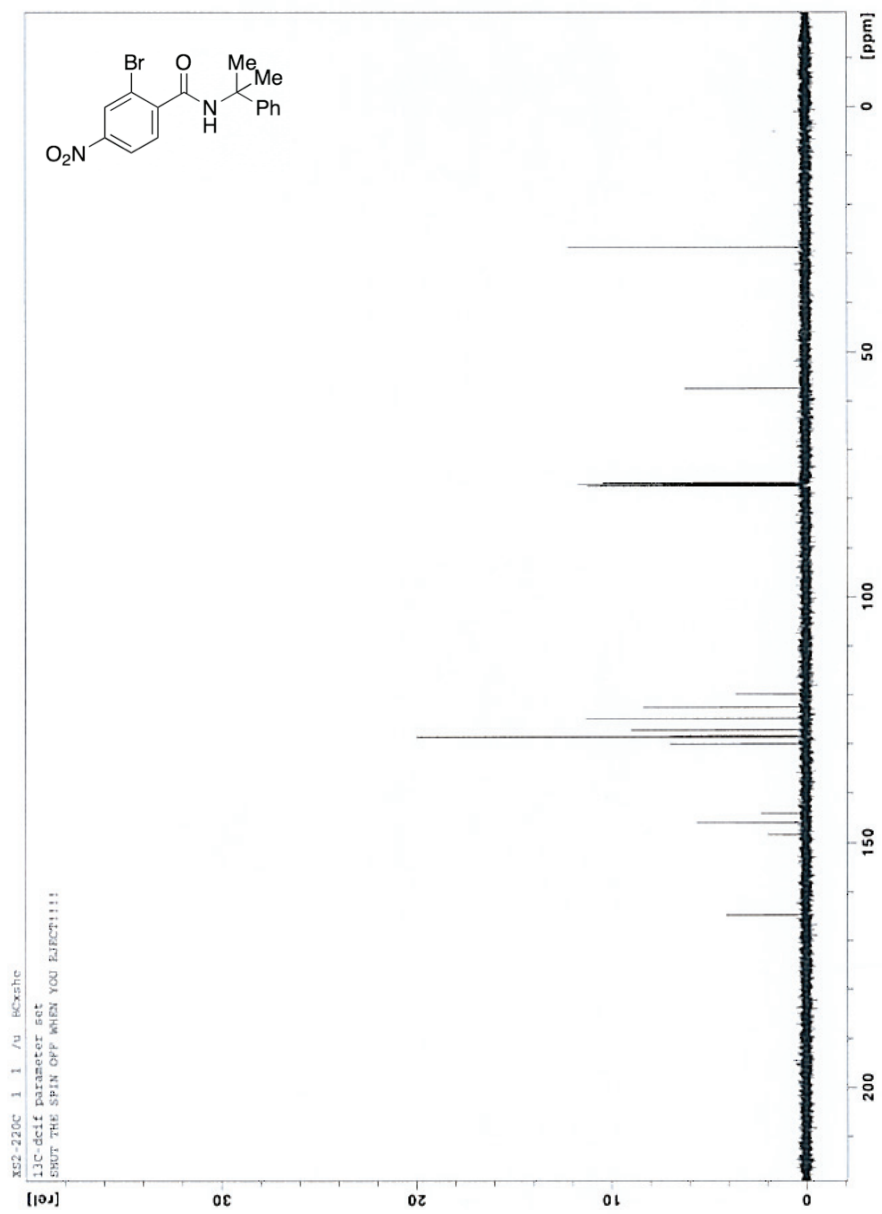

XS2-219H 1 1 2: ECXshs

1H-dclif Parameter set

SHUT THE SPIN OFF WHEN YOU EJECT!!!

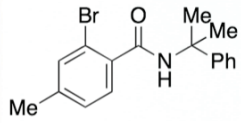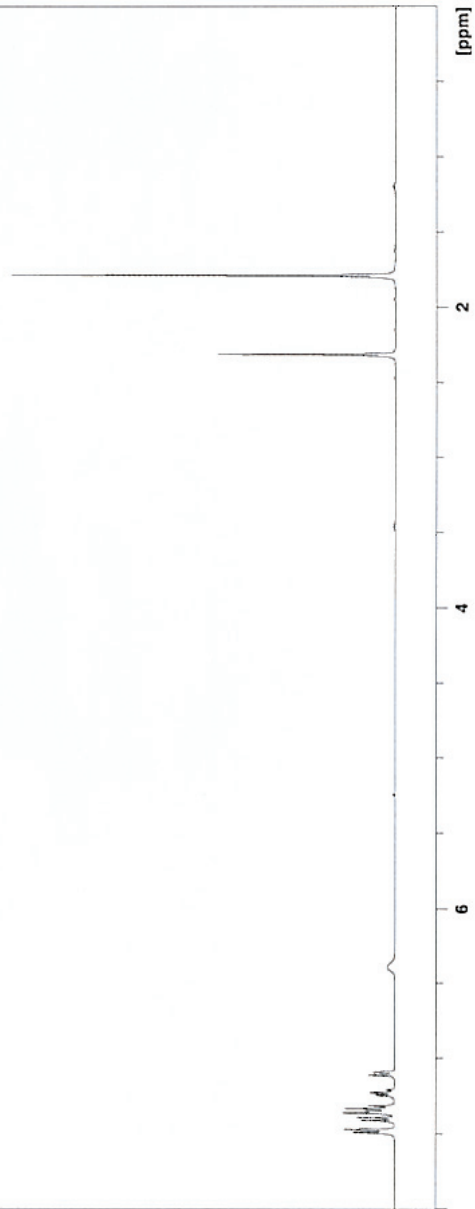

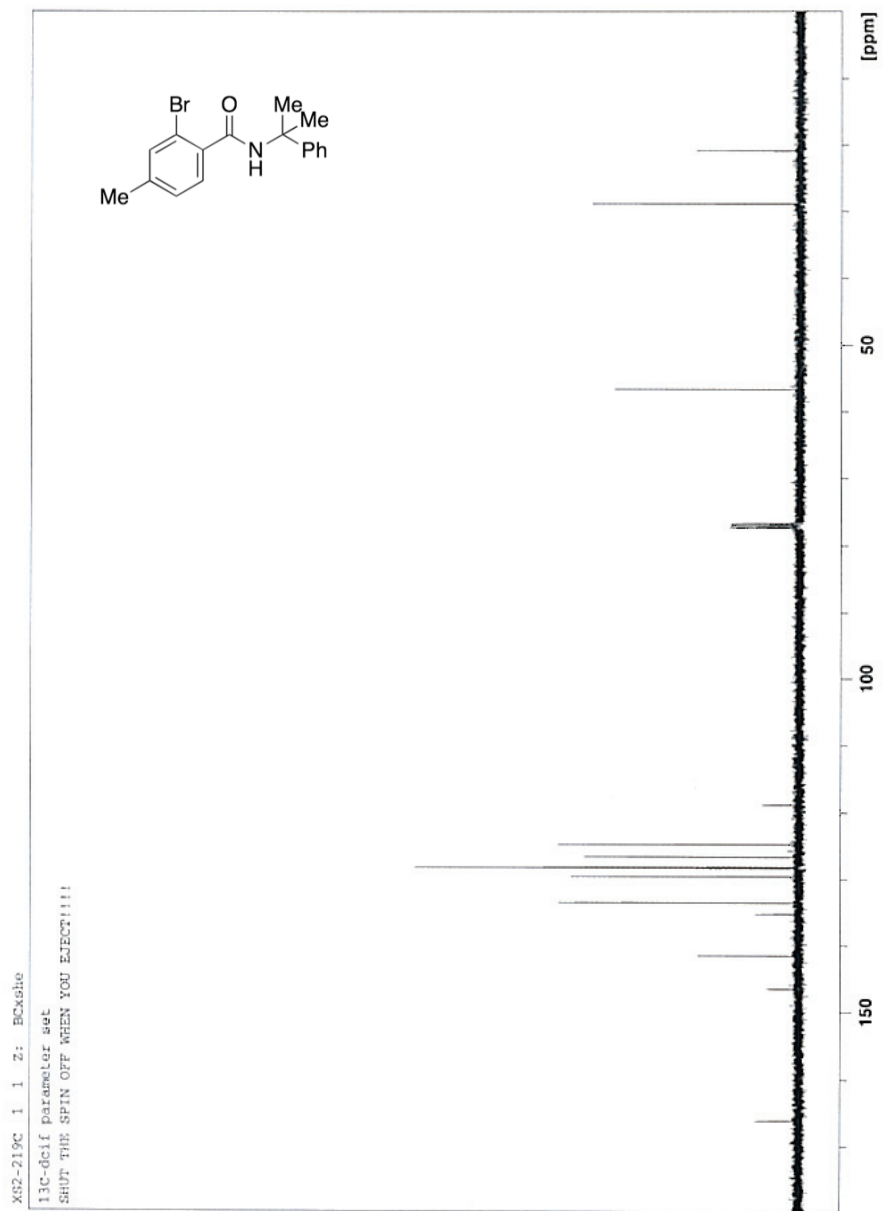

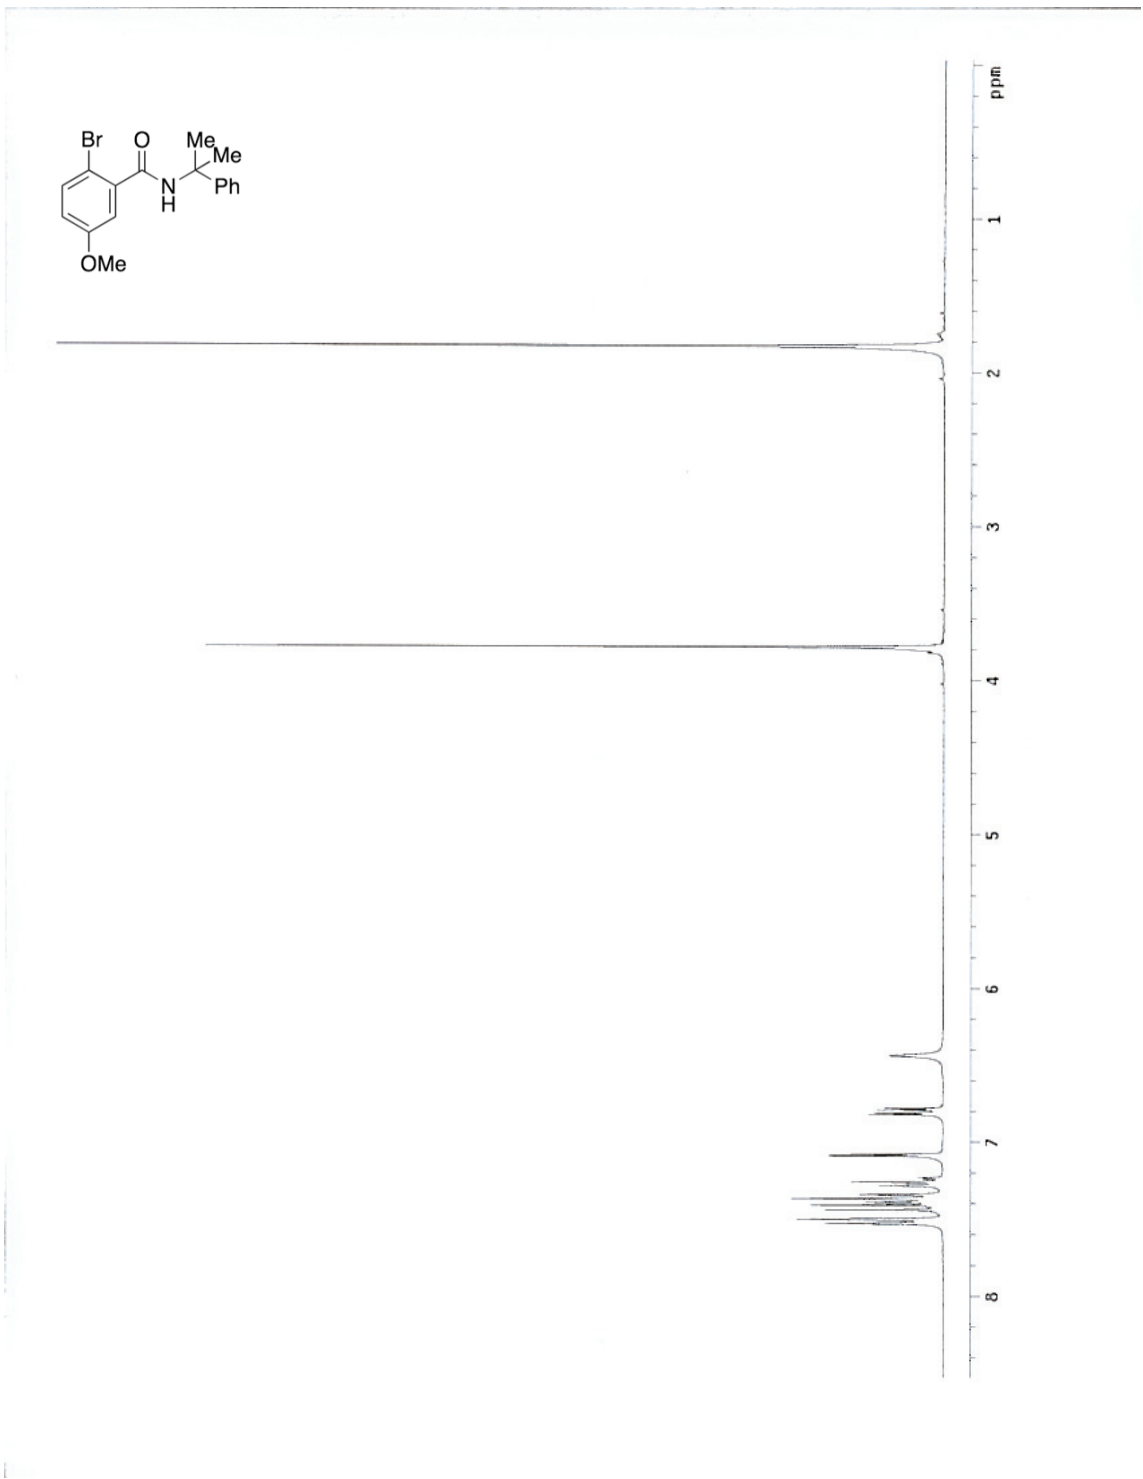

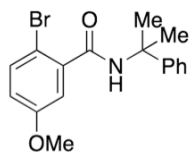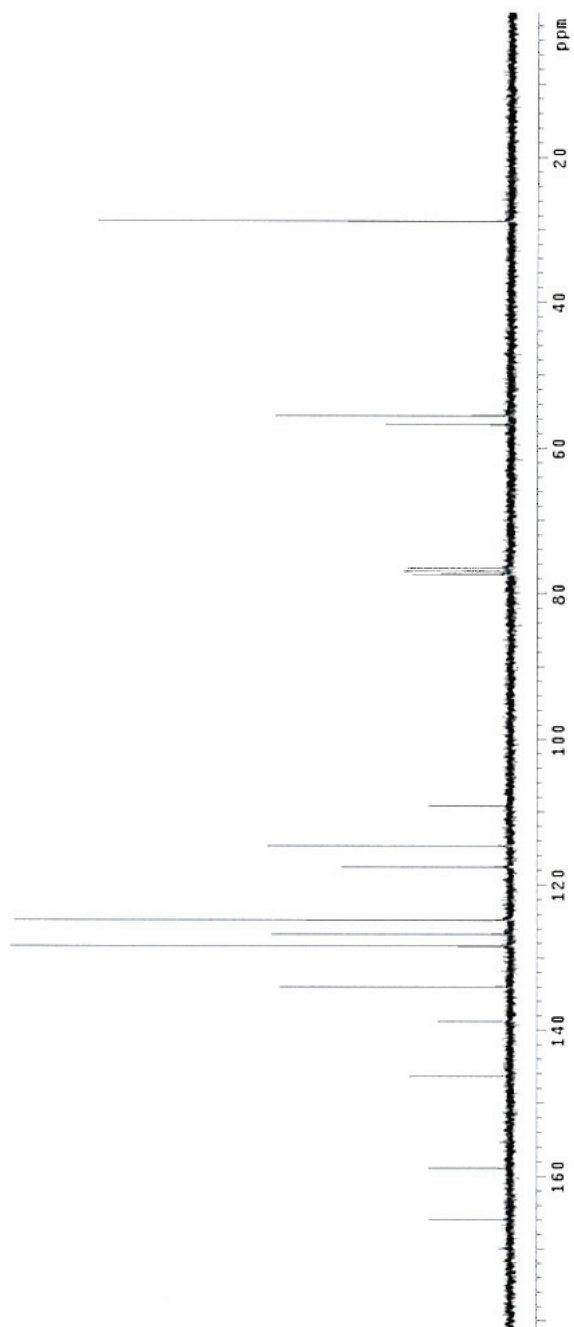

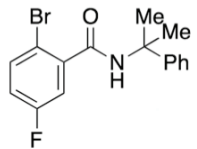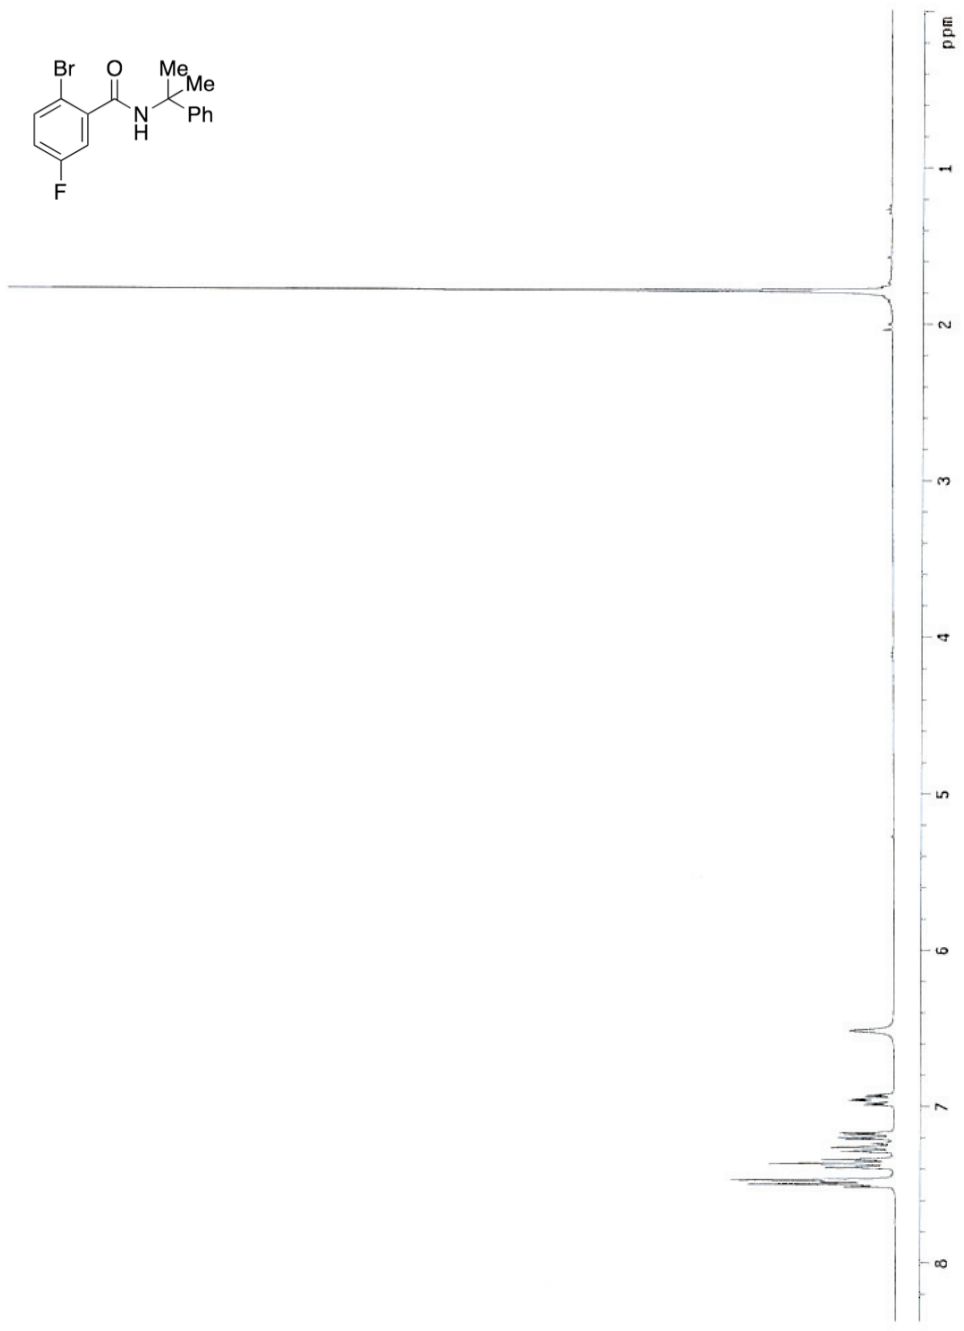

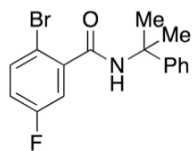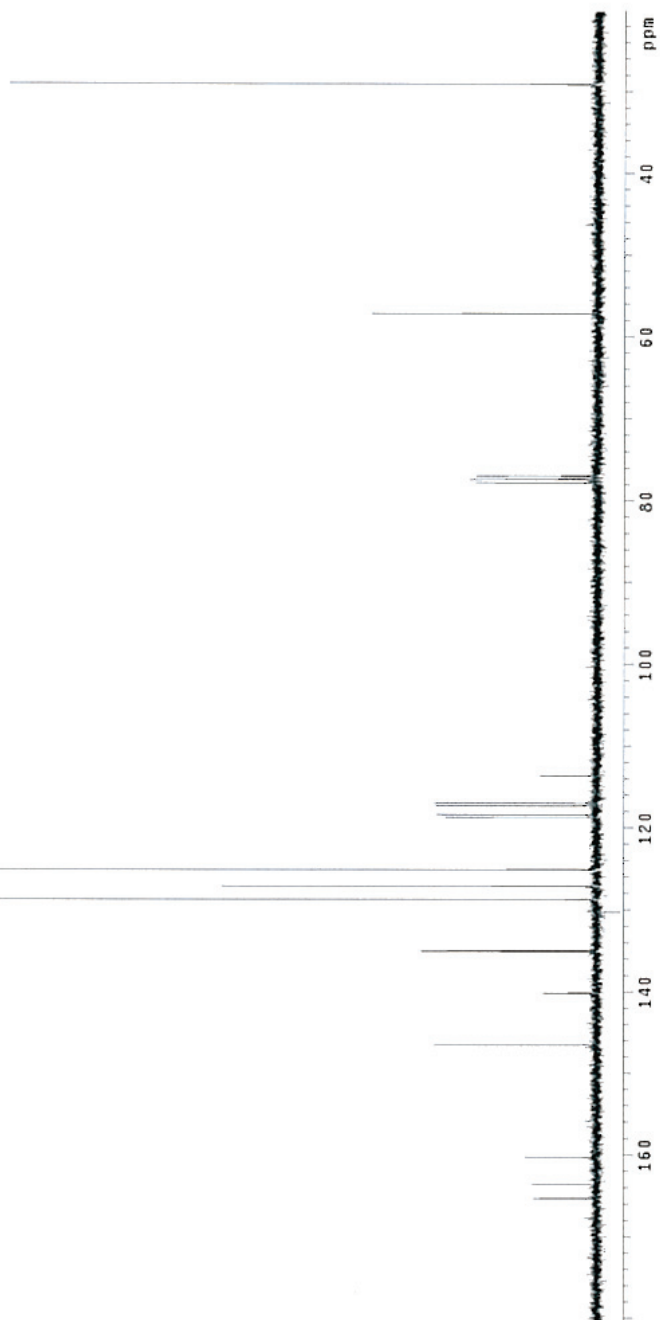



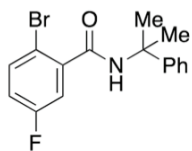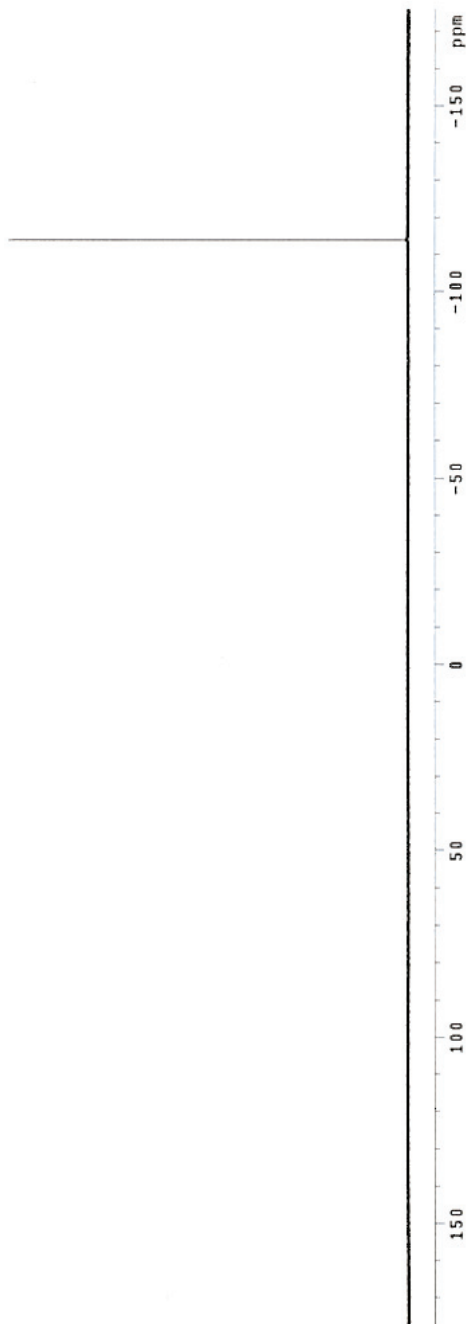

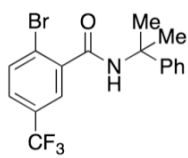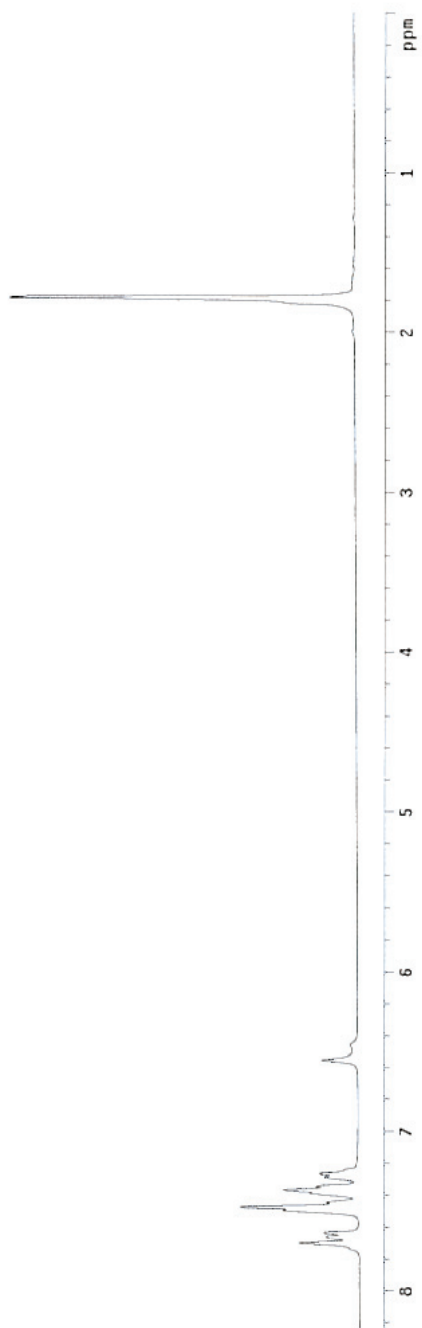

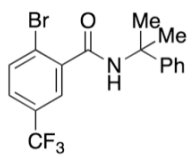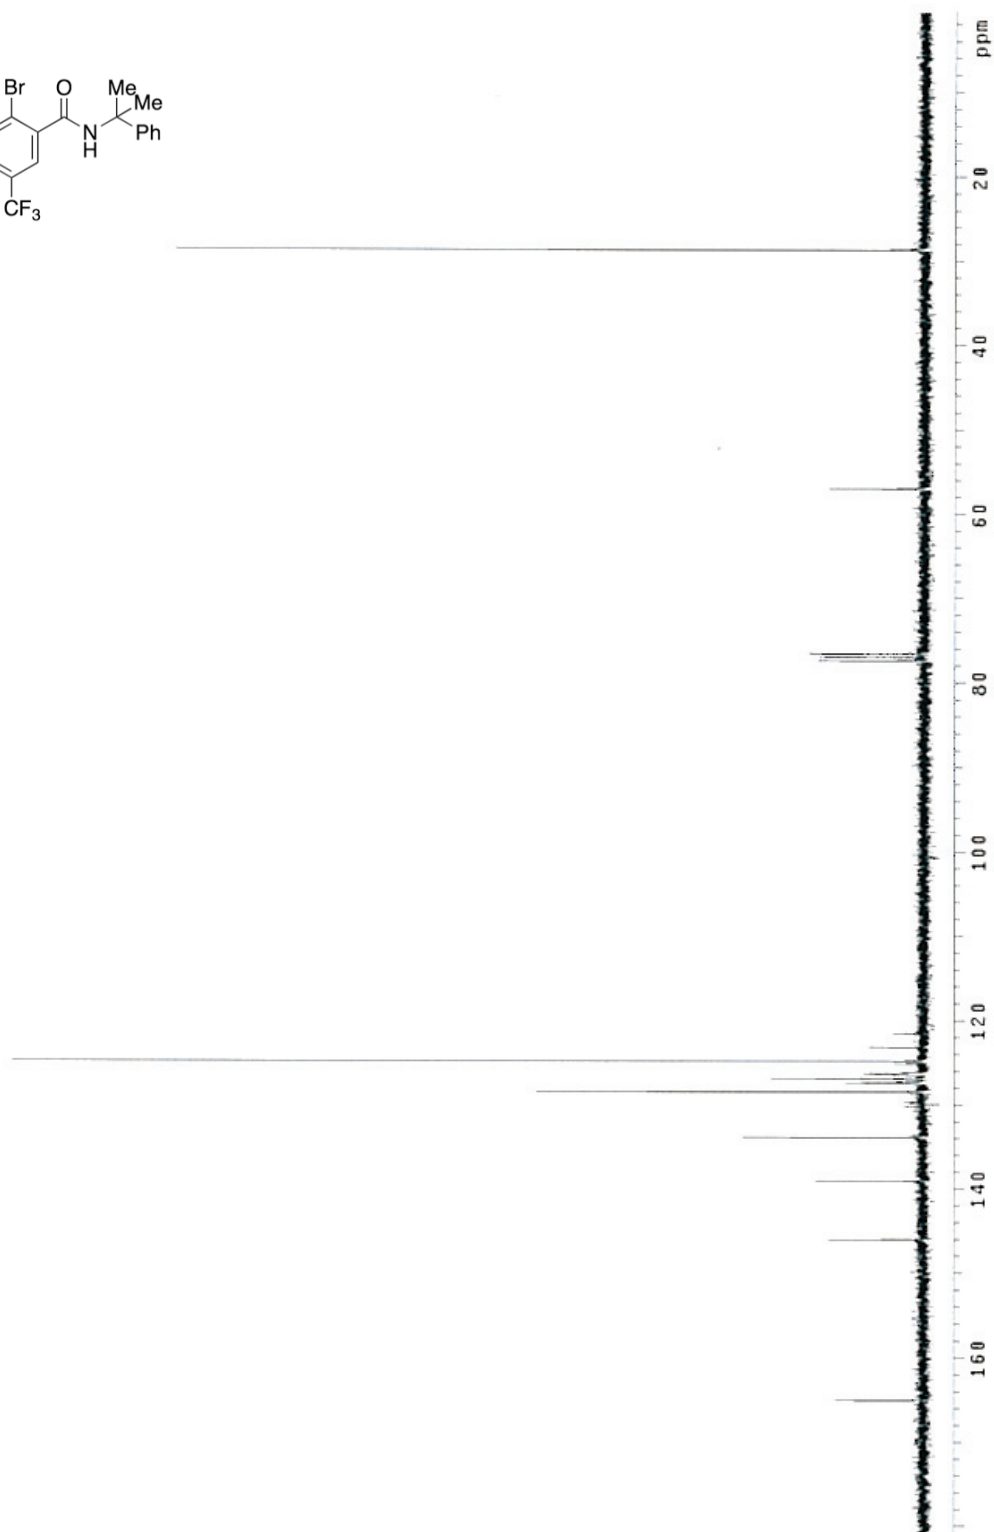

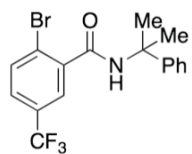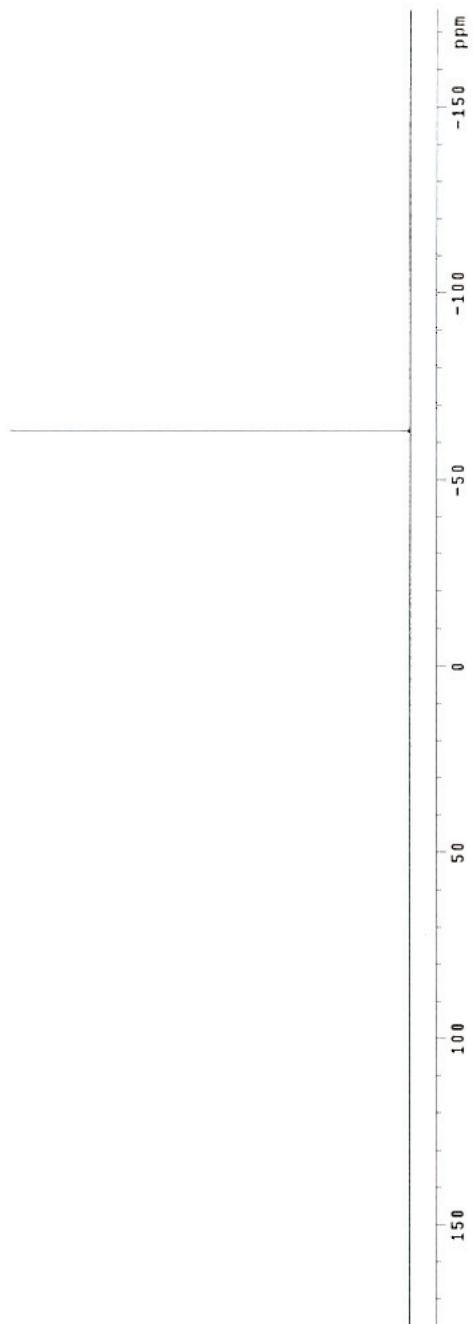

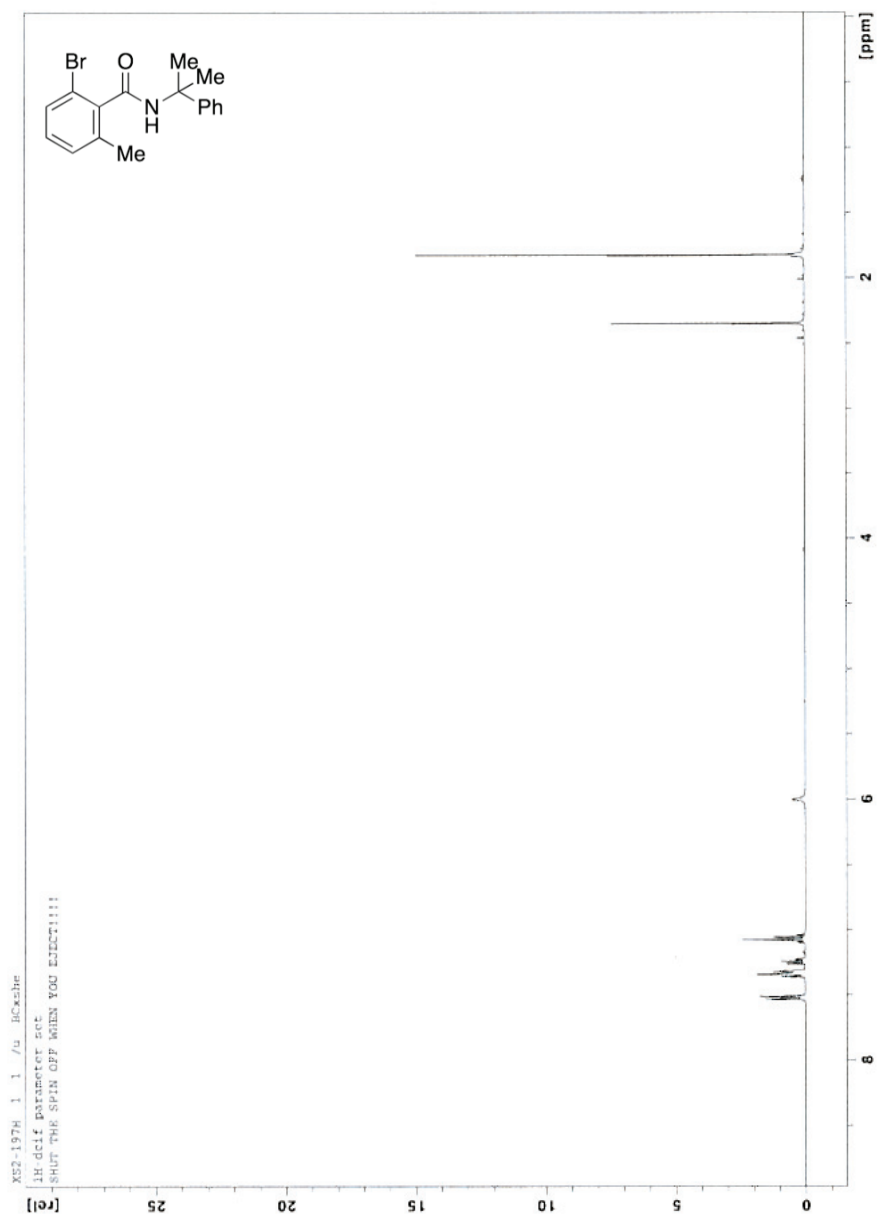

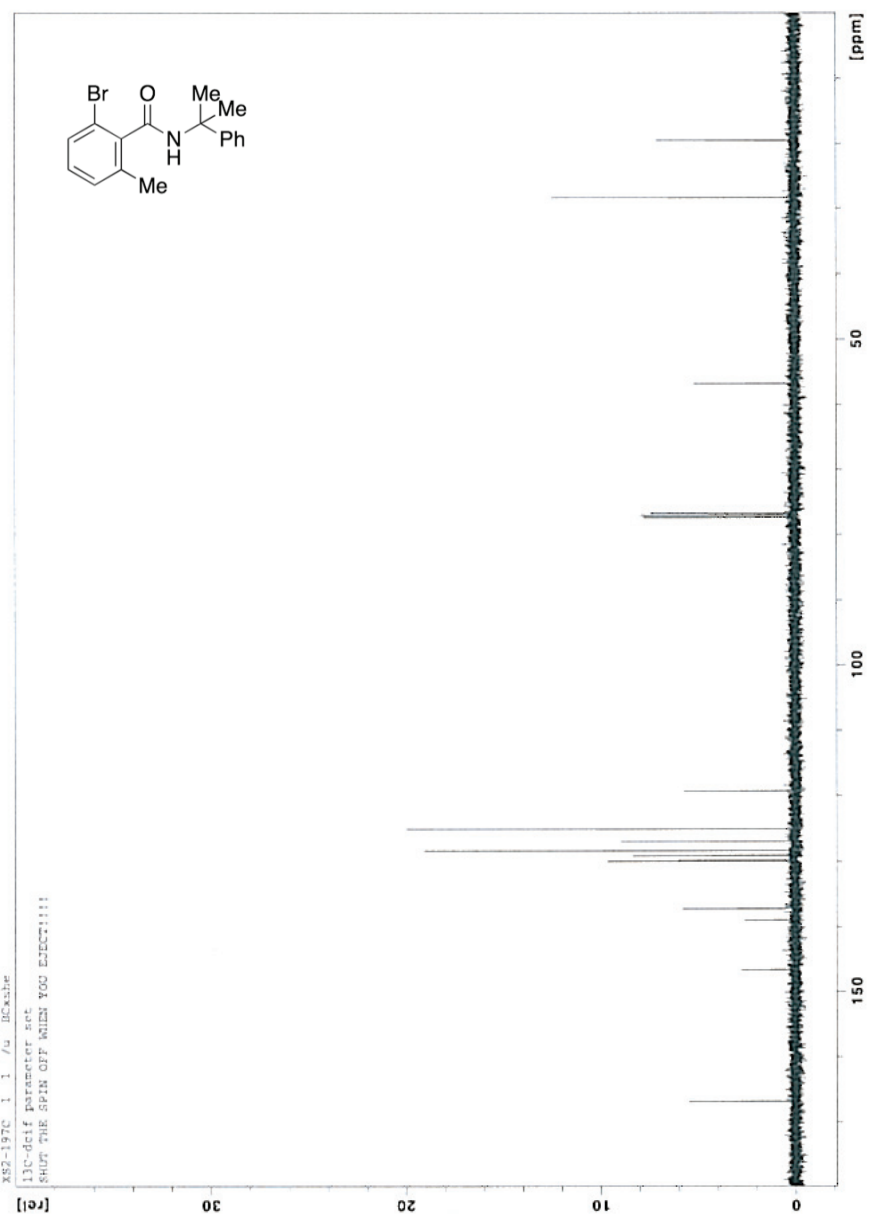

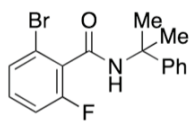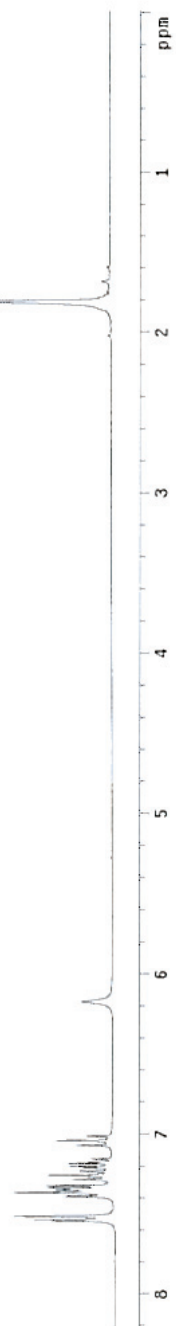

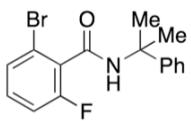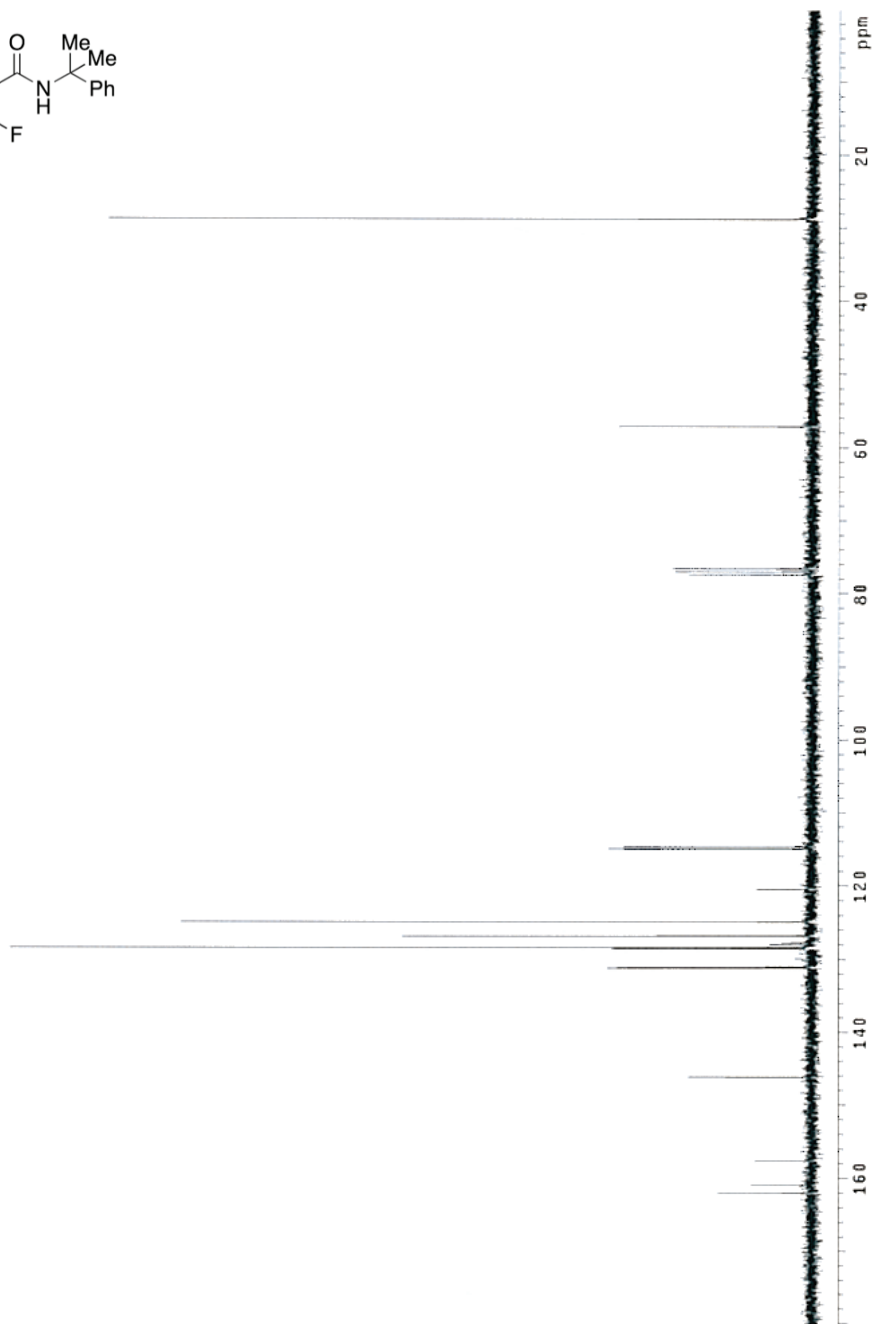



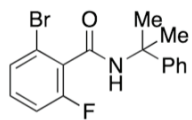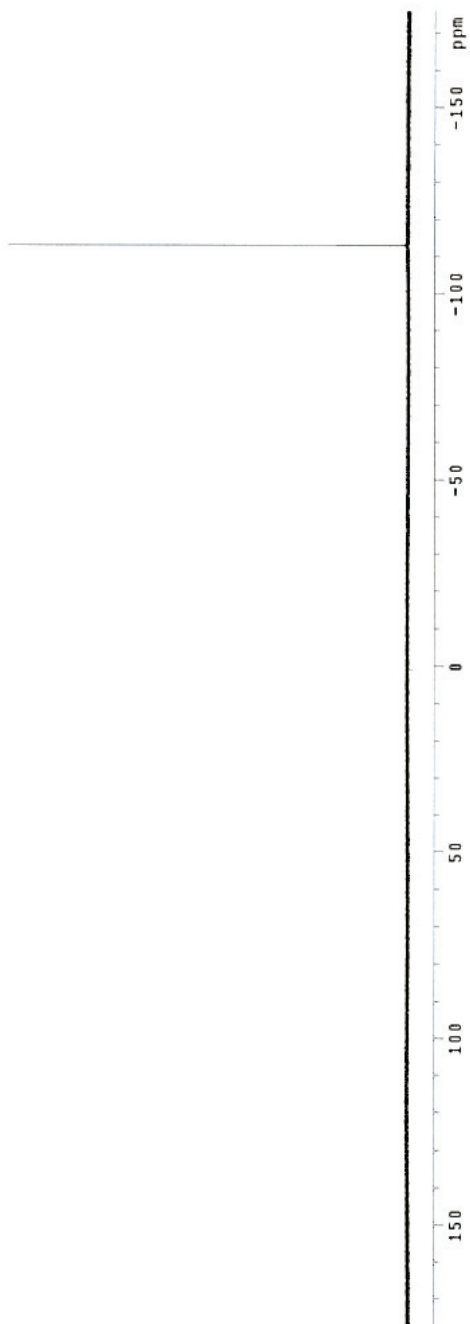

XS2-167H 1 1 2: ECXshle

1H-delif parameter set  
SHUT THE SPIN OFF WHEN YOU EJECT!!!!

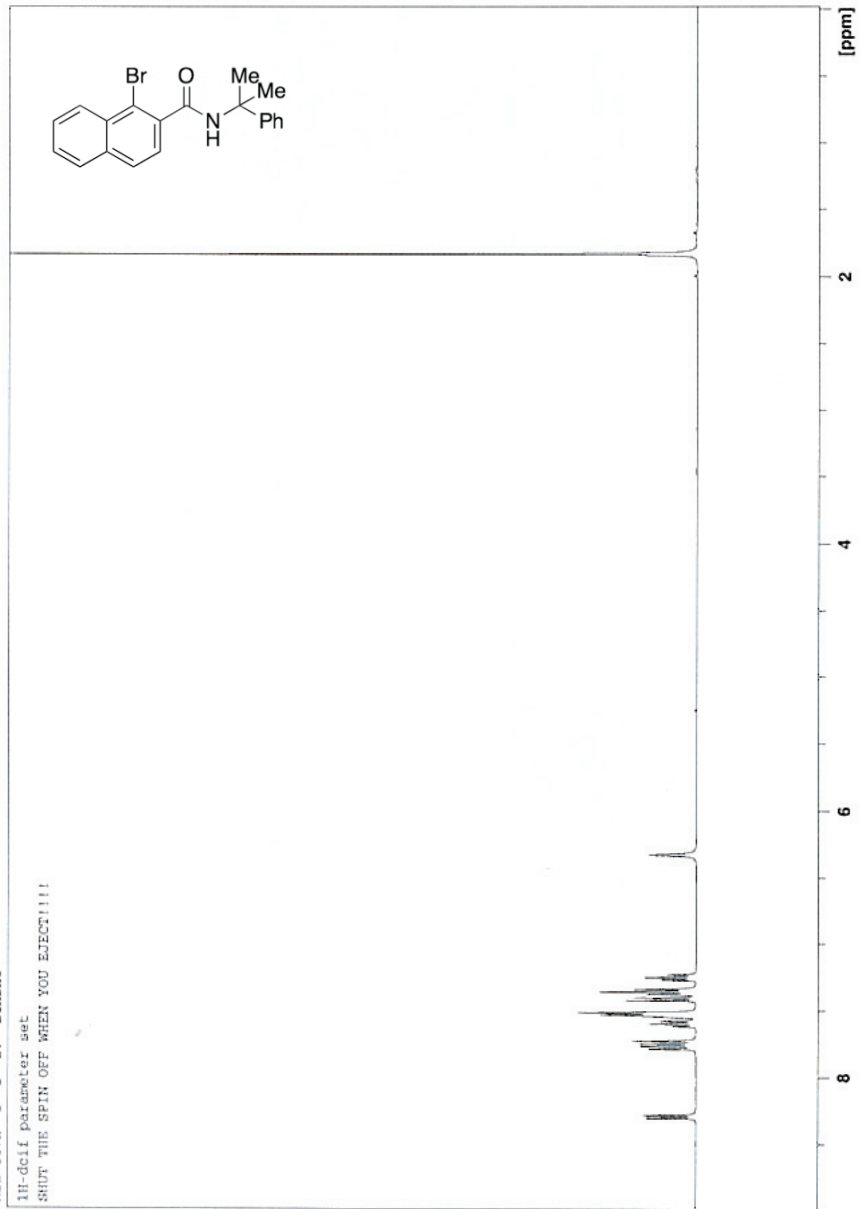

MS2.167C 1 1 Z: BCxshh

13C-deif parameter set

SHUT THE SHIN OFF WHEN YOU EJECT!!!

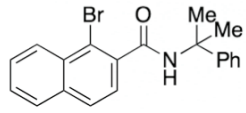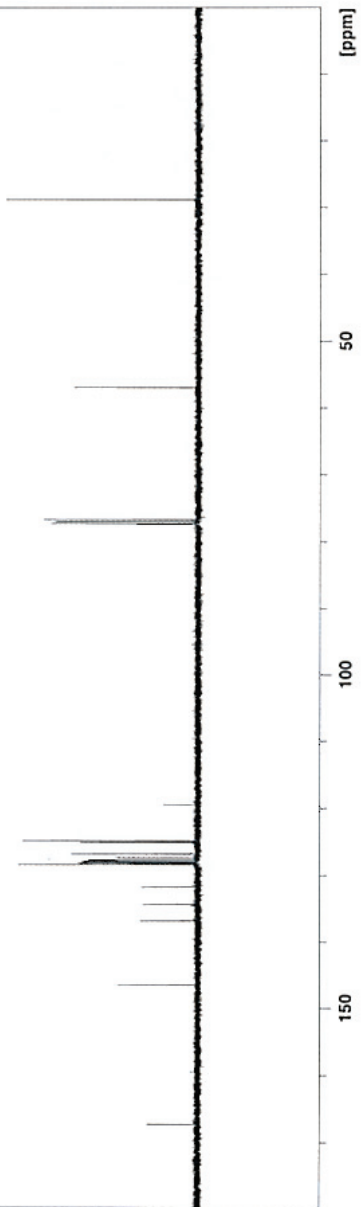

XS2-168H 1 1 2: BCXshh

1H-dclif parameter set

SHUT THE SPIN OFF WHEN YOU EJECT!!!

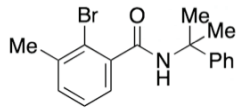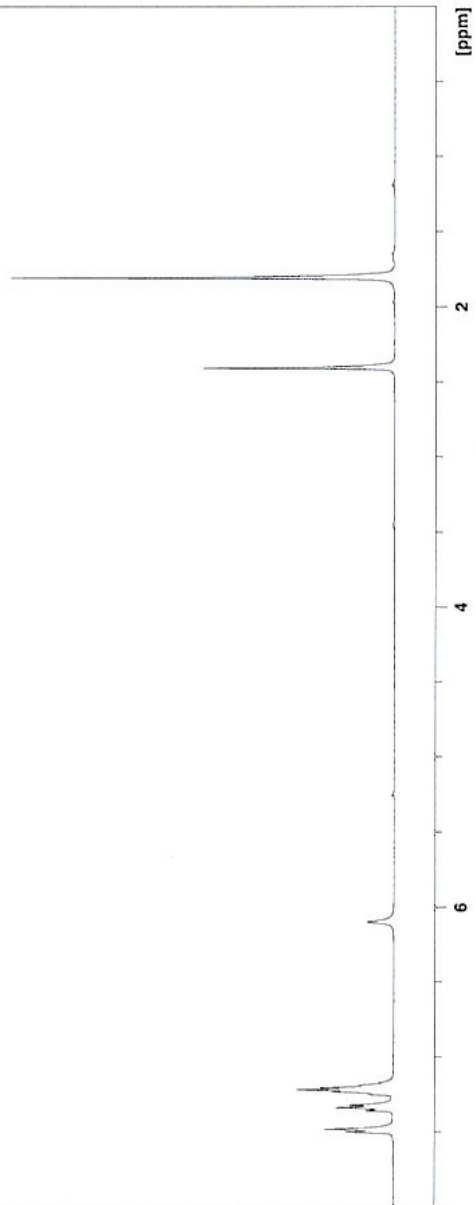

XE2-166C 1 1 Z: ECxshh

13C-dclif parameter set

SHUT THE SPIN OFF WHEN YOU EJECT!!!

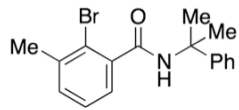

[ppm]

50

100

150

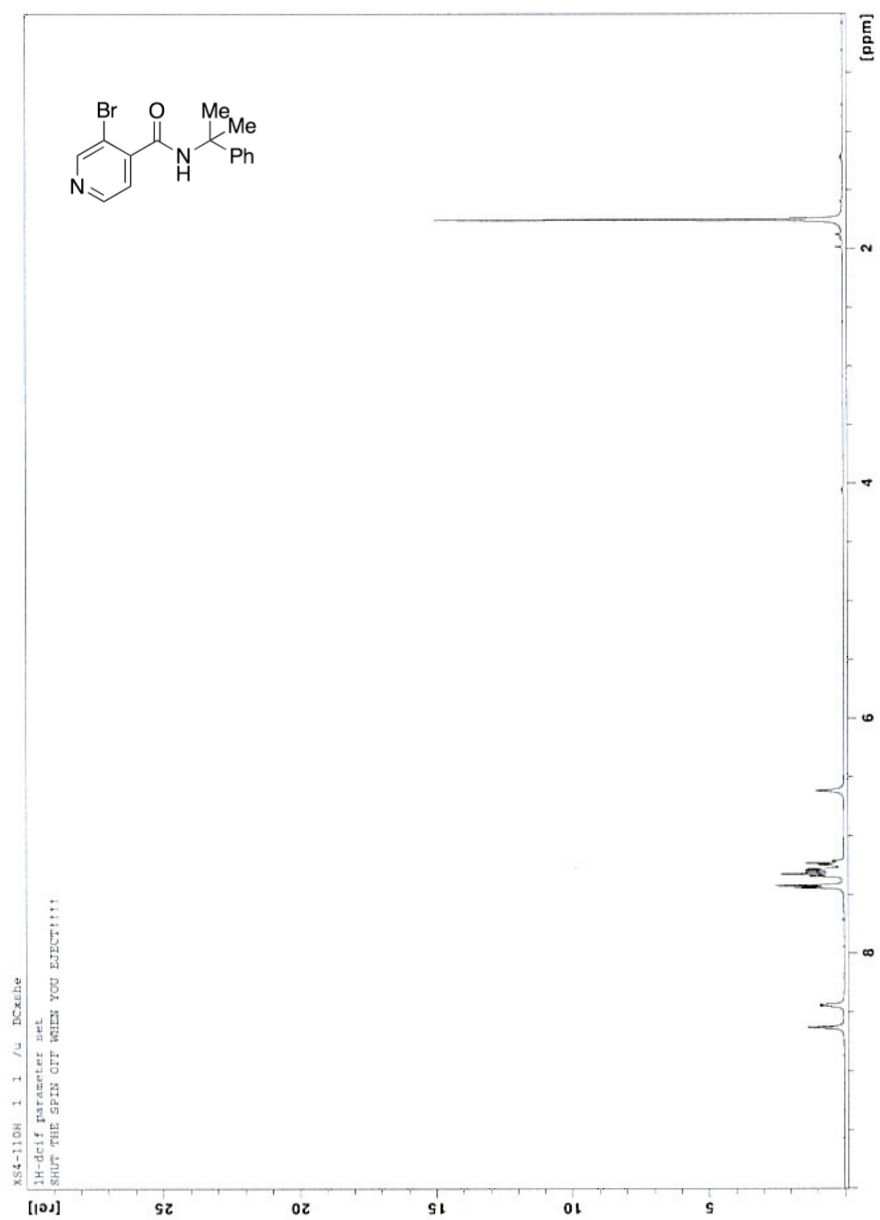

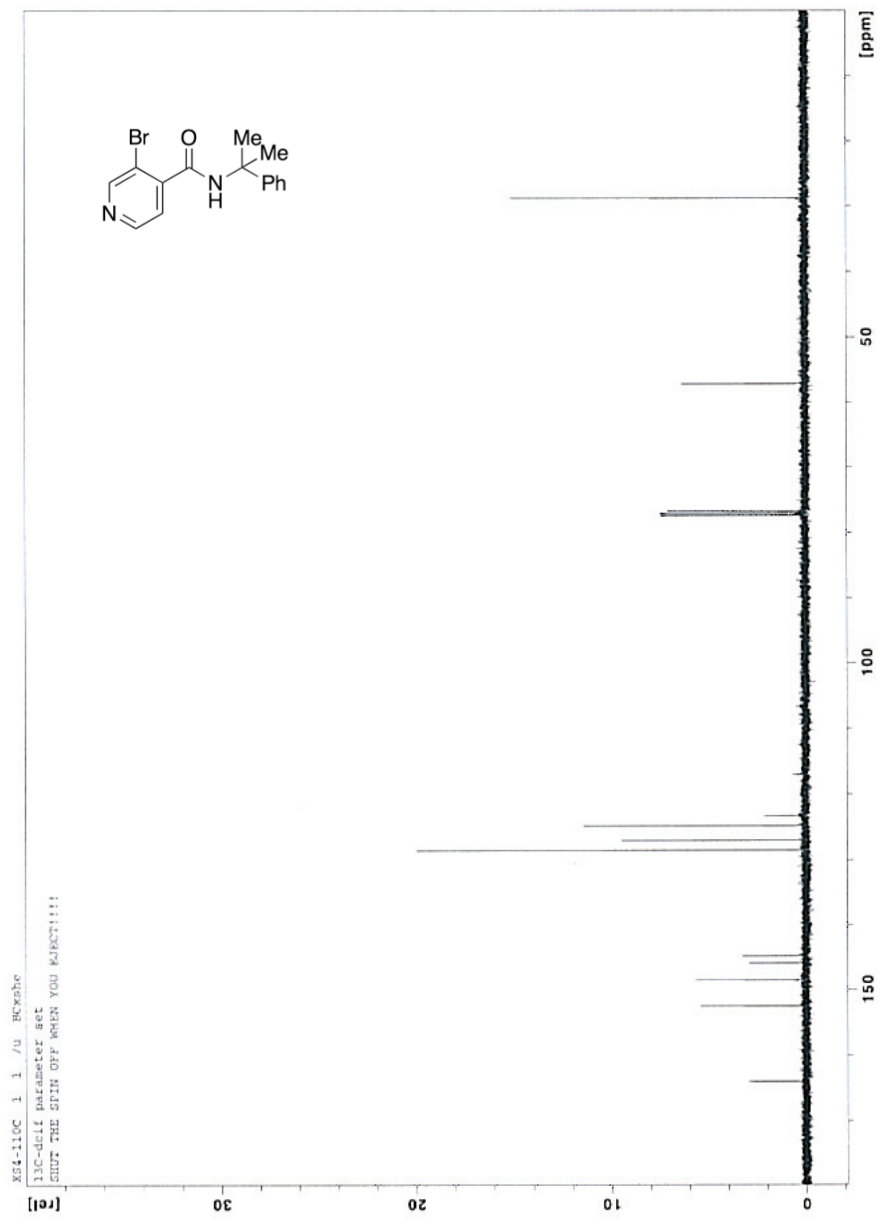

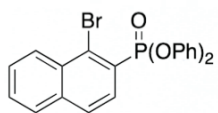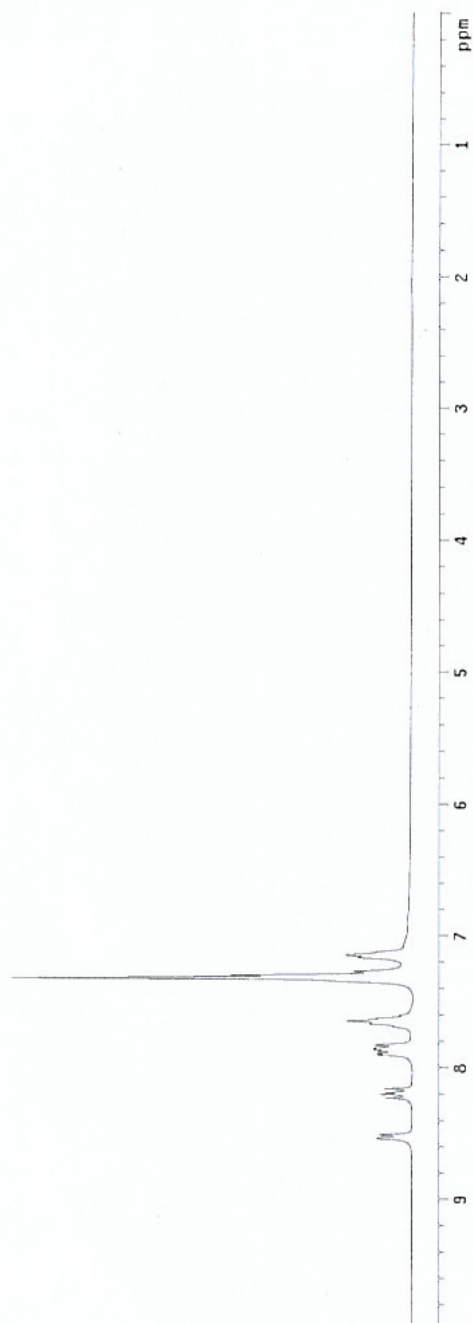



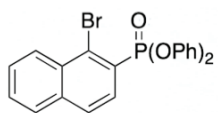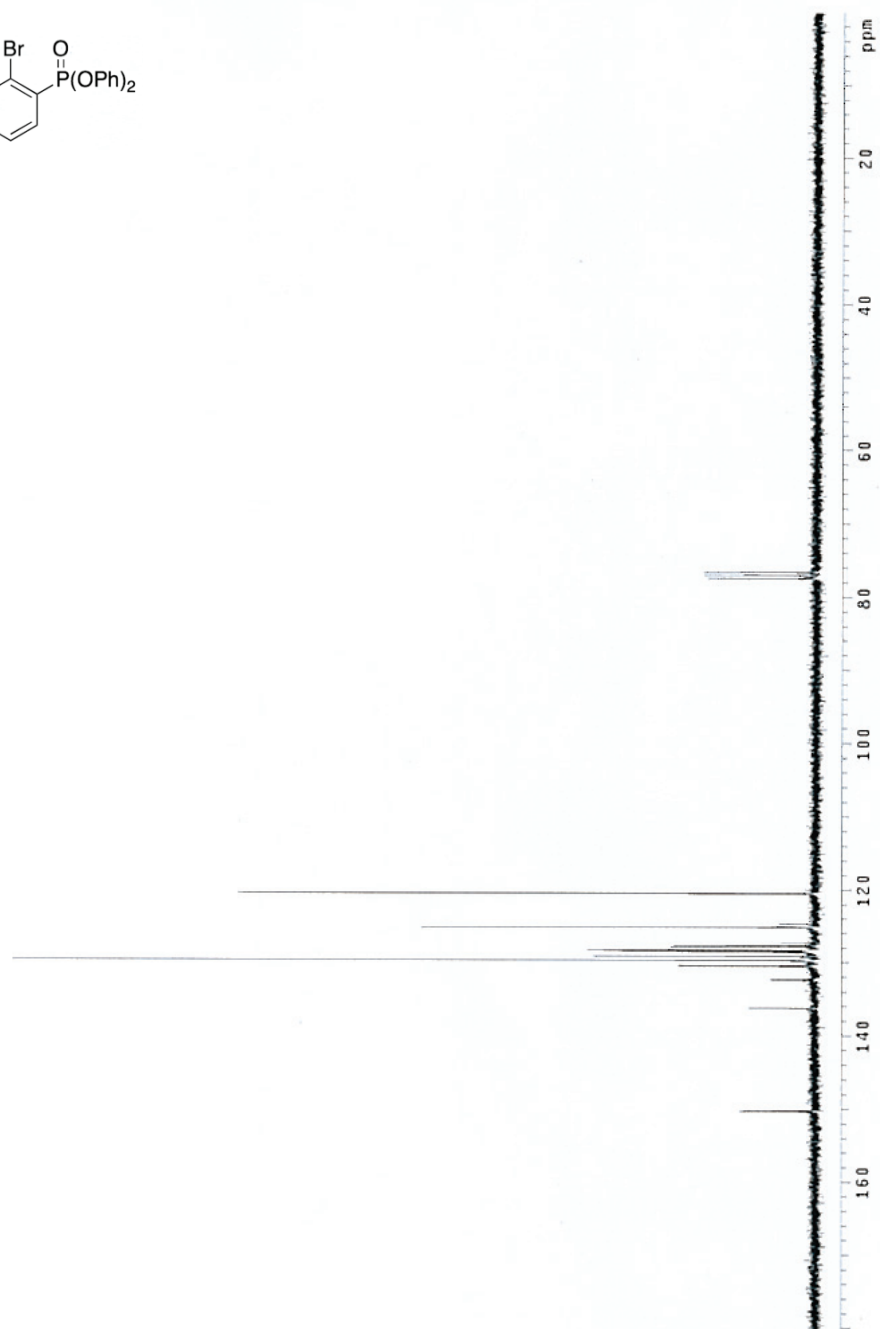

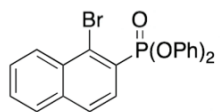

98.5' 6

ppm

-60

-40

-20

0

20

40

60

80

100

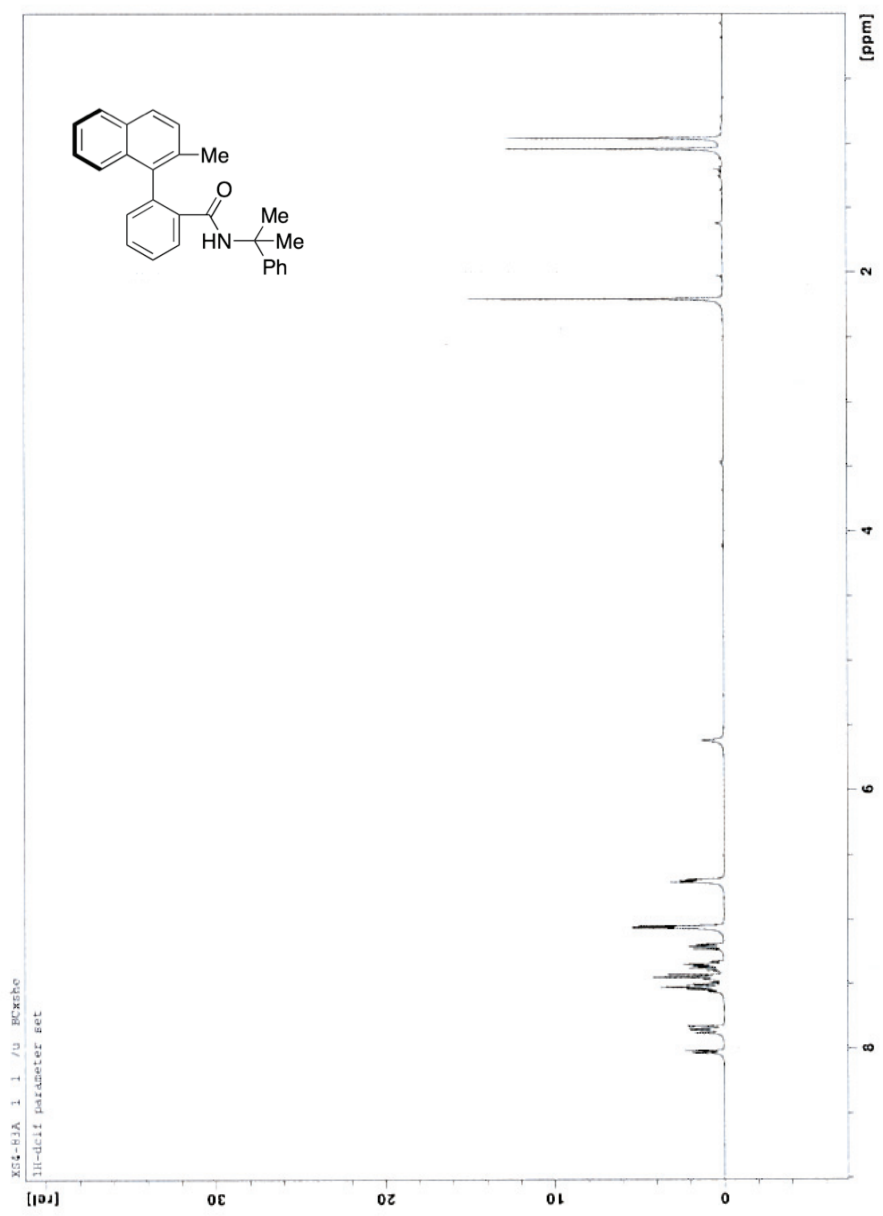

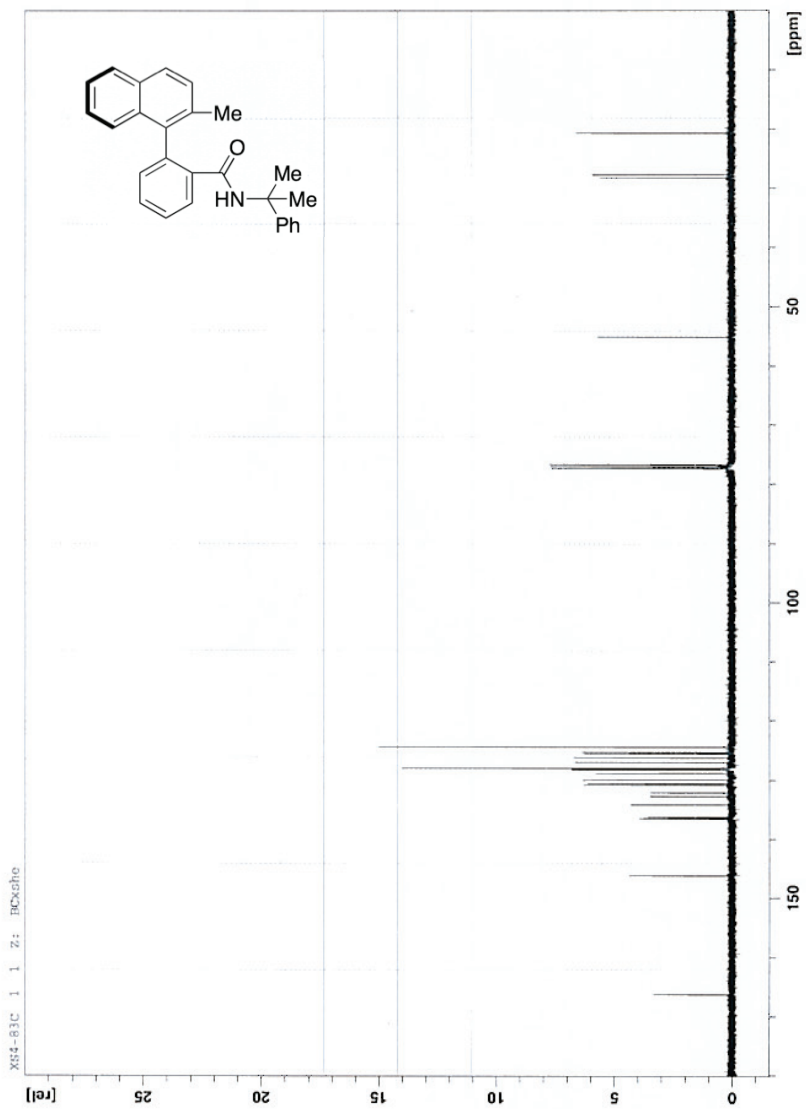

Data File C:\CHEM32\1\DATA\XS\XS4-83A.D  
Sample Name: XS4-83A

-----  
Acq. Operator : XS  
Acq. Instrument : Instrument 1 Location : Vial 1  
Injection Date : 5/16/2009 5:59:09 PM Inj Volume : 0.2 µl  
Acq. Method : C:\CHEM32\1\METHODS\JGF30.M  
Last changed : 5/16/2009 5:49:34 PM by XS  
(modified after loading)  
Analysis Method : C:\CHEM32\1\DATA\XS\XS4-83A.D\DA.M (JGF30.M)  
Last changed : 5/16/2009 6:25:04 PM by XS  
Method Info : 60% n-Hexane  
40% i-propanol  
0.5 ml/min

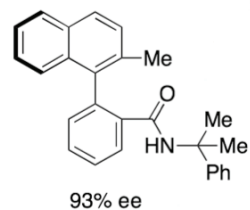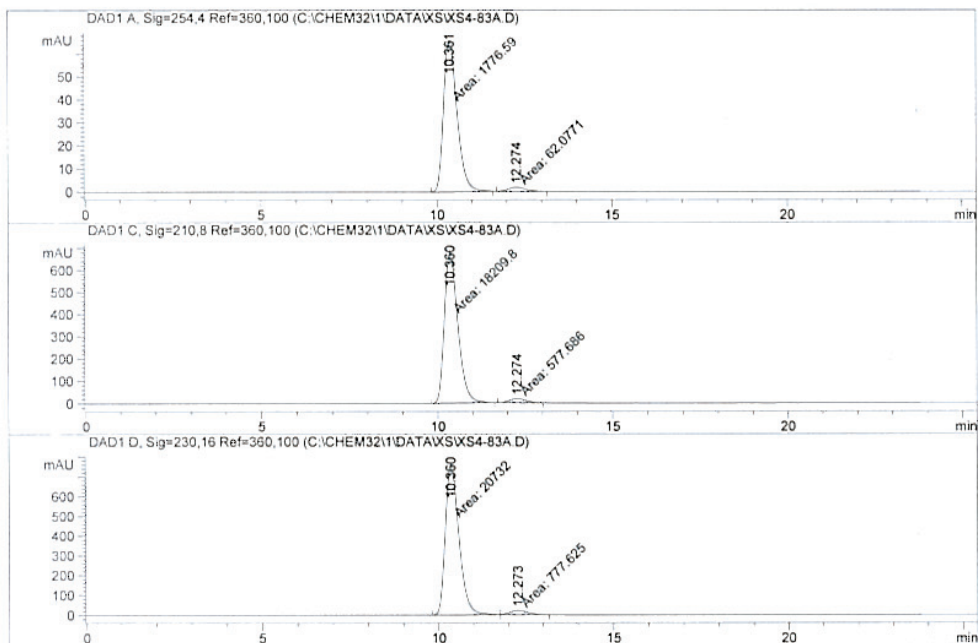

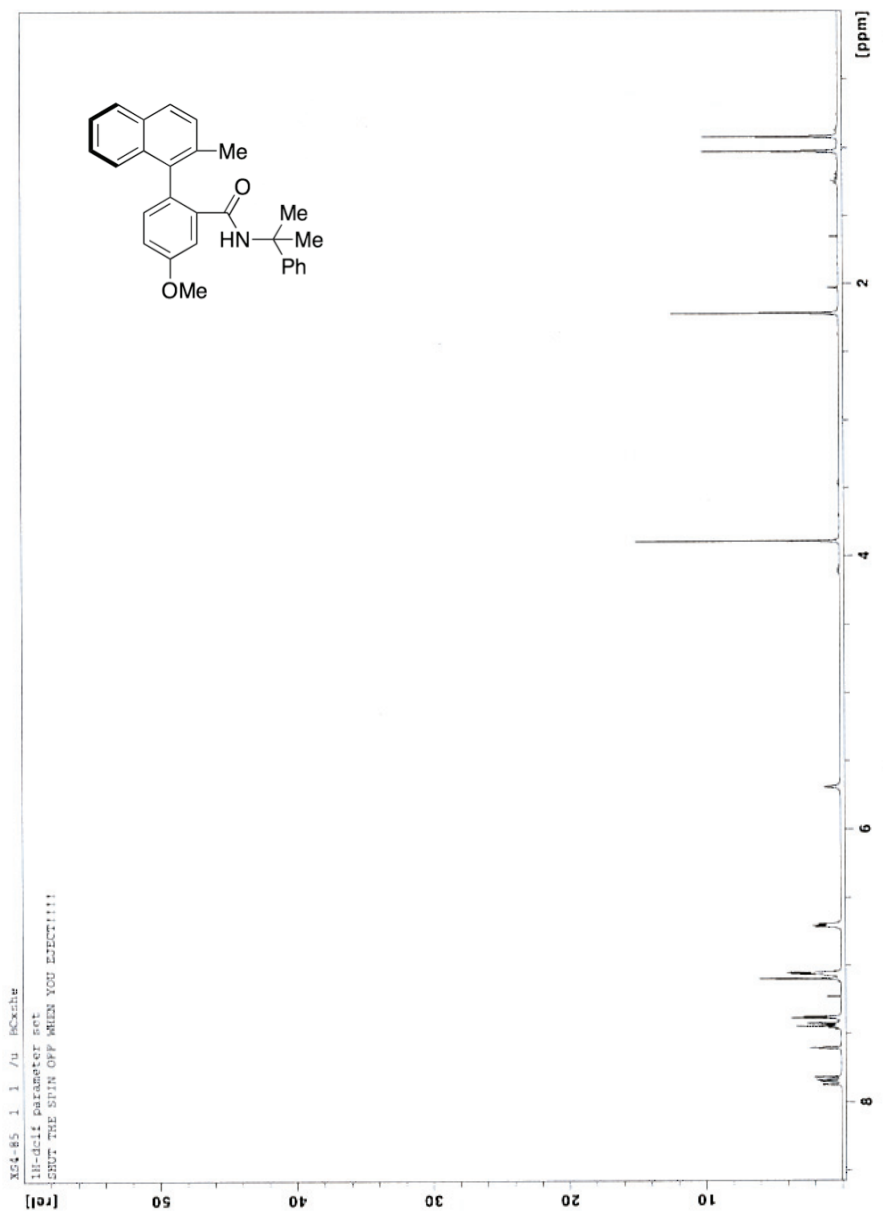

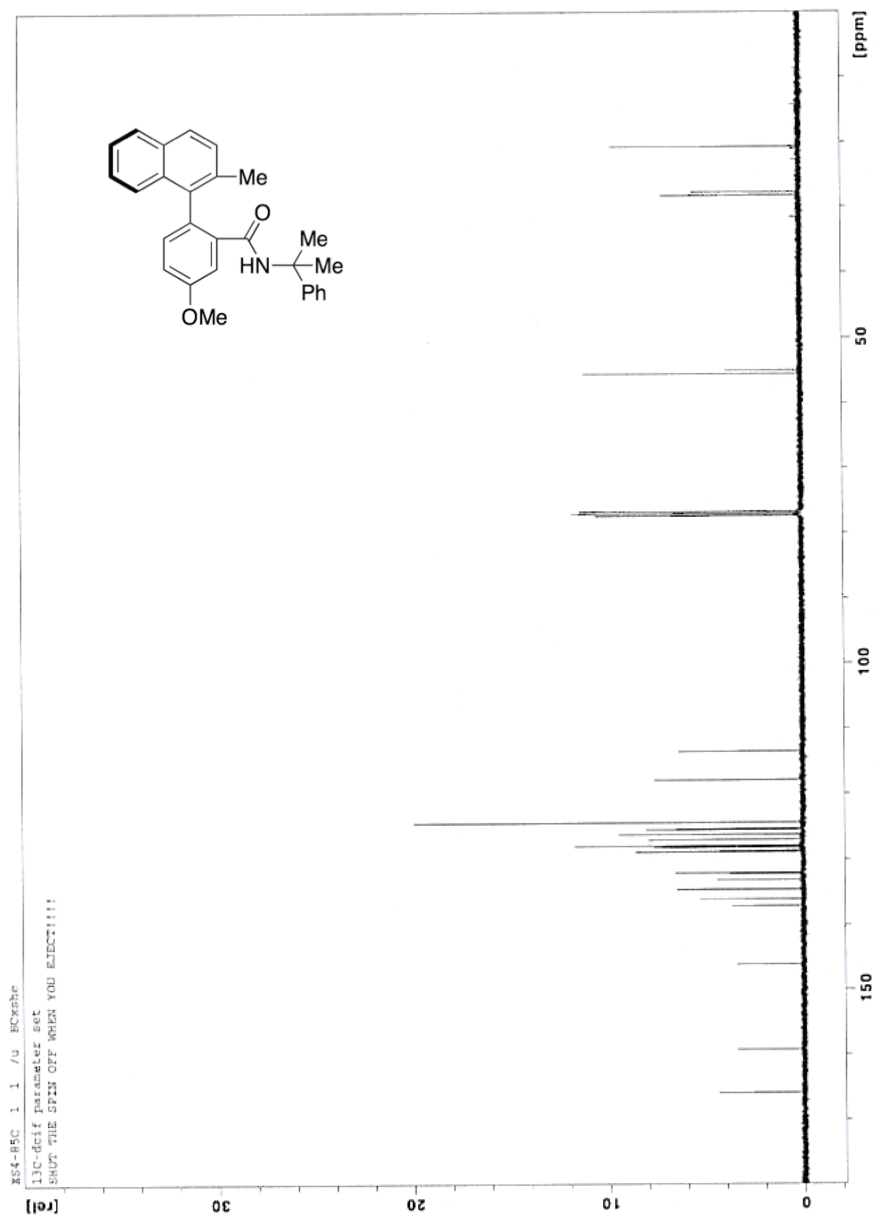

Data File C:\CHEM32\1\DATA\XS\XS4-85.D  
Sample Name: XS4-85

-----  
Acq. Operator : XS  
Acq. Instrument : Instrument 1 Location : Vial 1  
Injection Date : 5/19/2009 1:05:36 PM Inj Volume : 0.5 µl  
Acq. Method : C:\CHEM32\1\METHODS\JGF30.M  
Last changed : 5/19/2009 1:04:50 PM by XS  
(modified after loading)  
Analysis Method : C:\CHEM32\1\DATA\XS\XS4-85.D\DA.M (JGF30.M)  
Last changed : 5/19/2009 1:30:33 PM by XS  
Method Info : 60% n-Hexane  
40% i-propanol  
0.5 ml/min

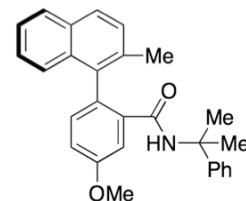

94% ee

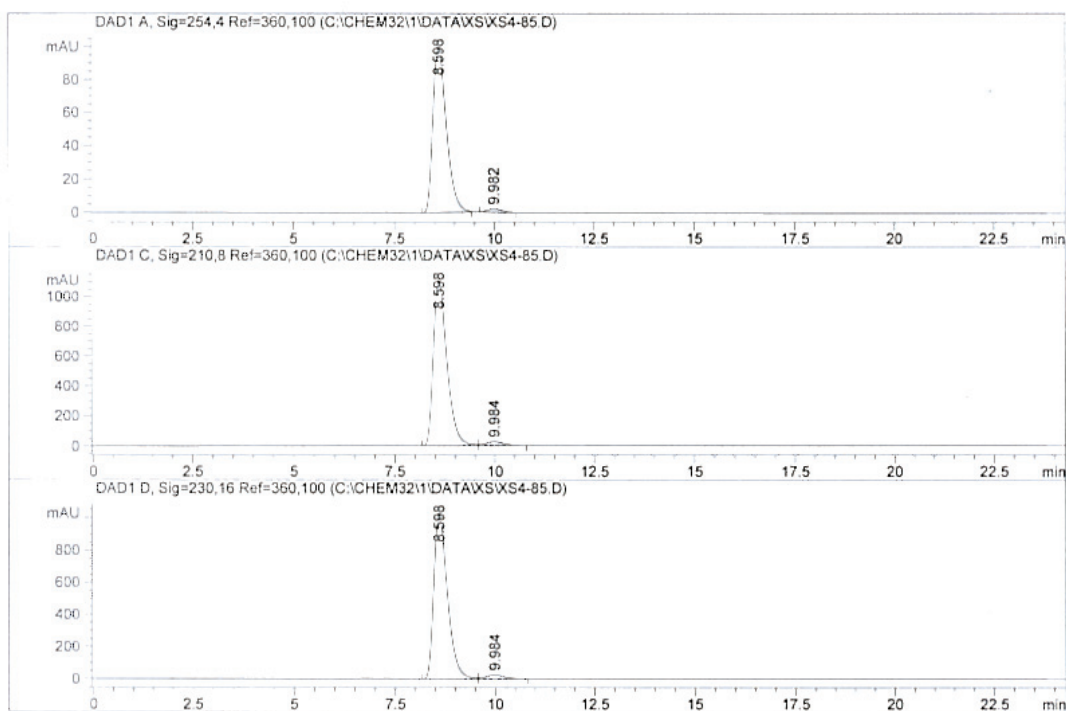



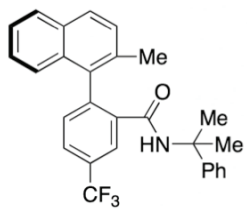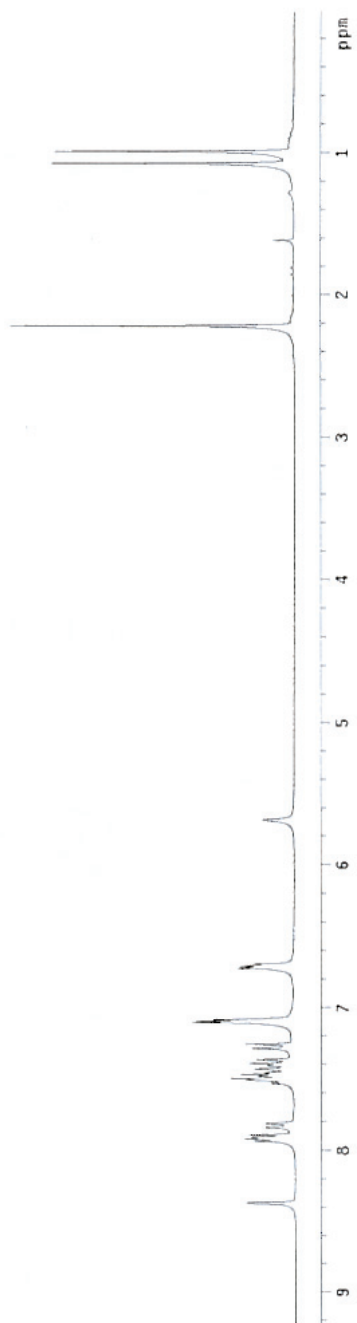

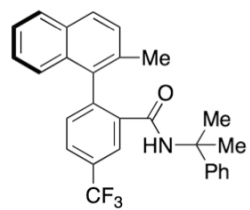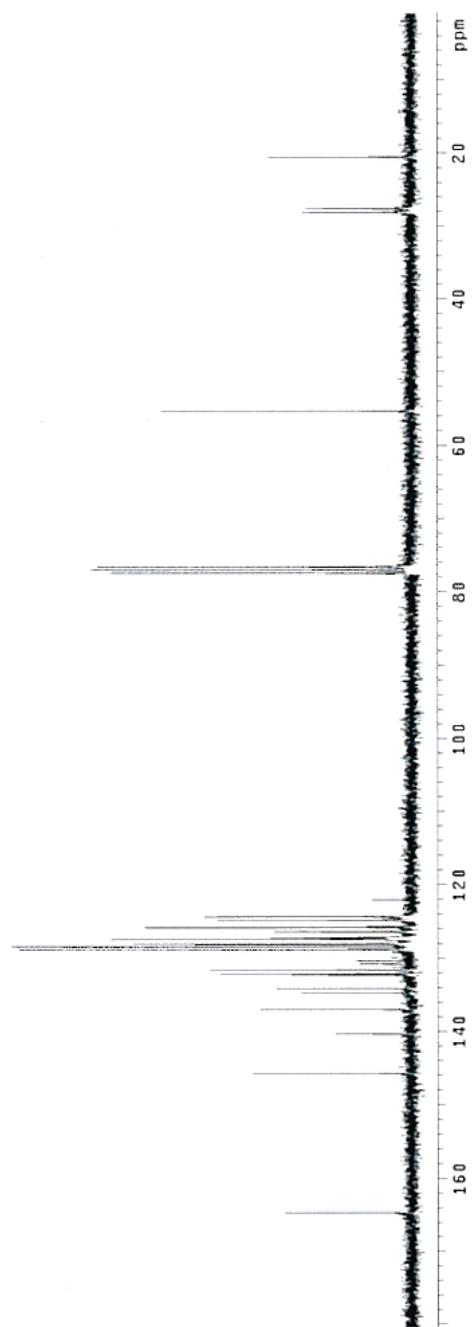

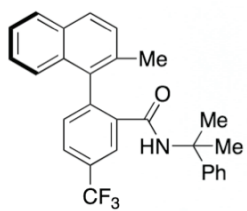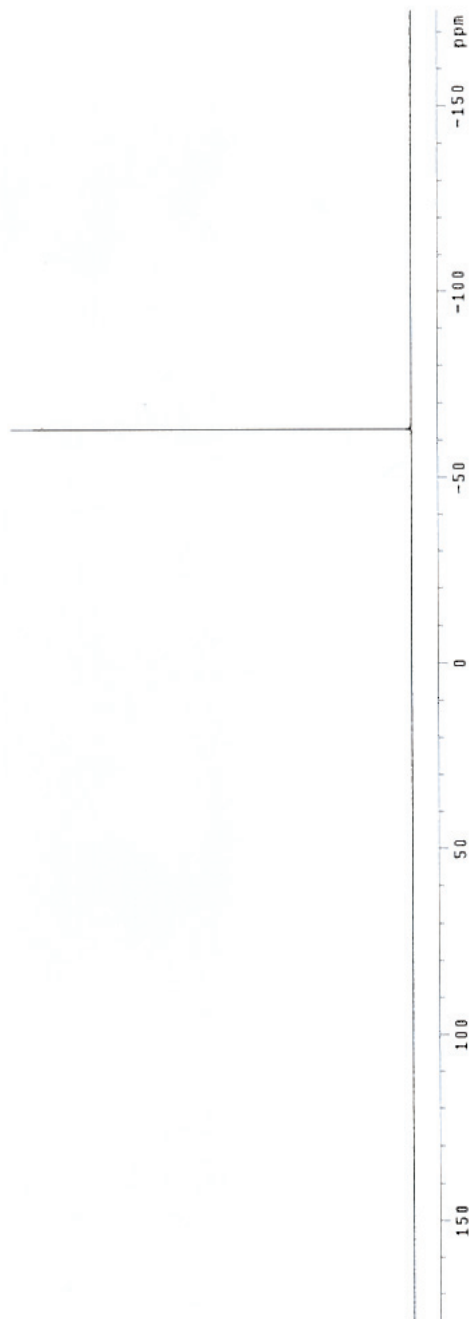

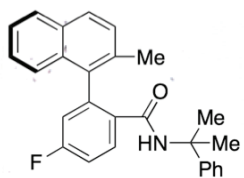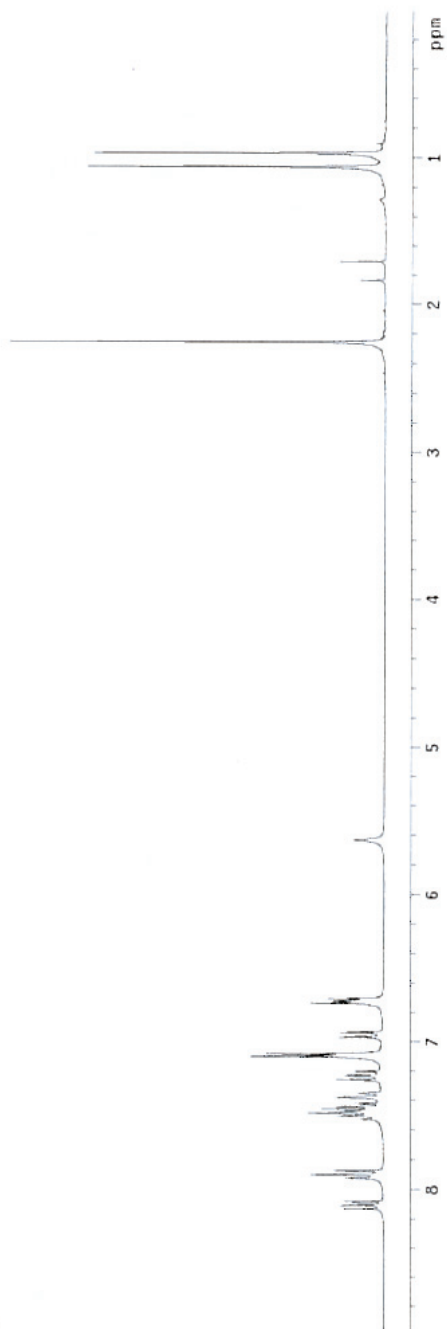

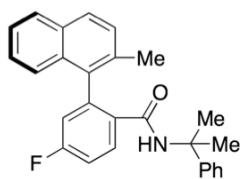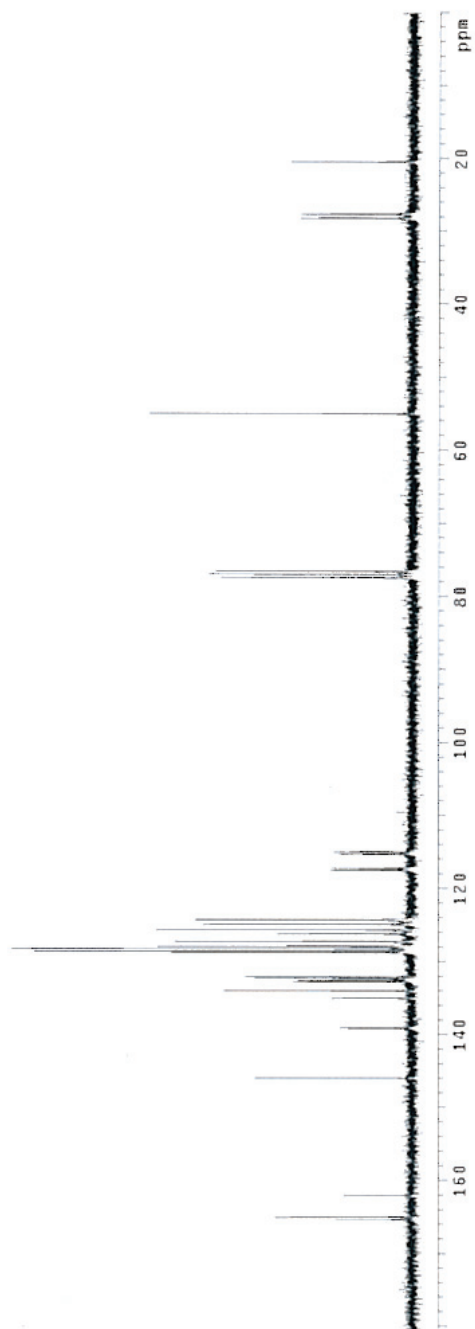

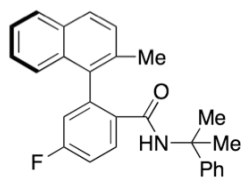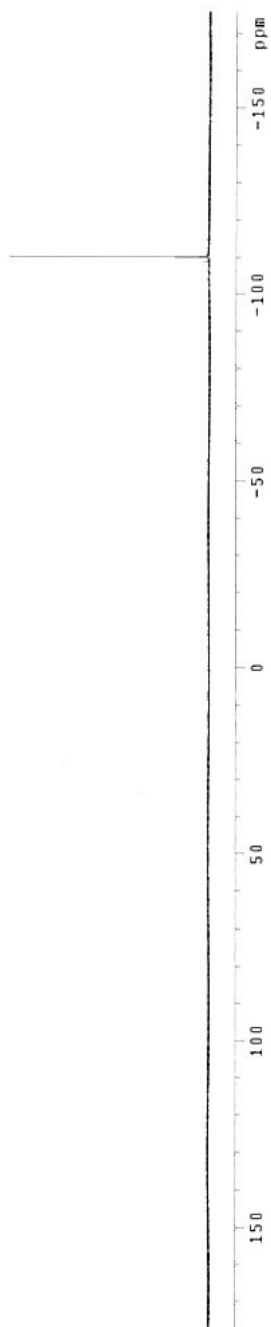

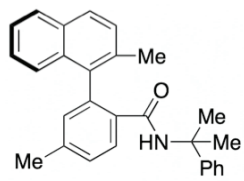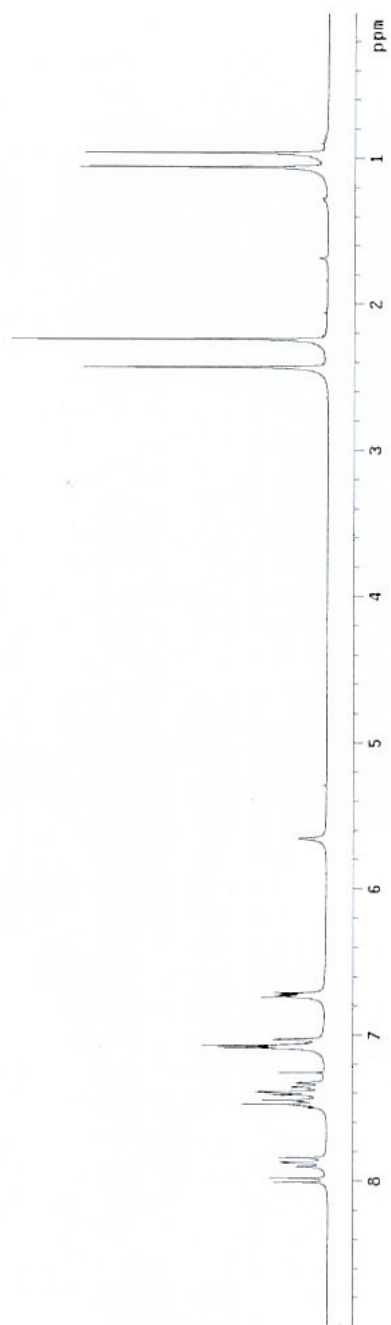

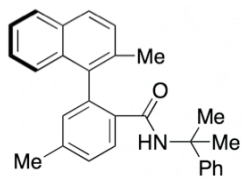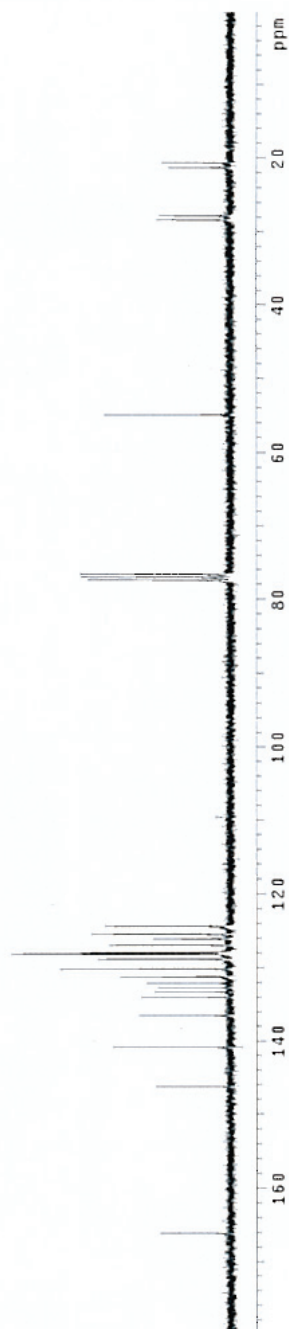



Data File C:\CHEM32\1\DATA\XS\XS4-89A.D  
Sample Name: XS4-89A

=====  
Acq. Operator : XS  
Acq. Instrument : Instrument 1 Location : Vial 21  
Injection Date : 6/22/2009 12:42:59 PM Inj Volume : 0.6 µl  
Acq. Method : C:\CHEM32\1\METHODS\ELLIOT-2.M  
Last changed : 6/22/2009 12:42:15 PM by XS  
(modified after loading)  
Analysis Method : C:\CHEM32\1\DATA\XS\XS4-89A.D\DA.M (ELLIOT-2.M)  
Last changed : 6/22/2009 1:24:28 PM by jACLYN  
(modified after loading)  
Sample Info : OD-H, 2.5% IPA IN HEXANE, 1.0ML/MIN

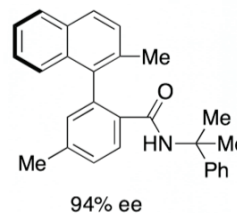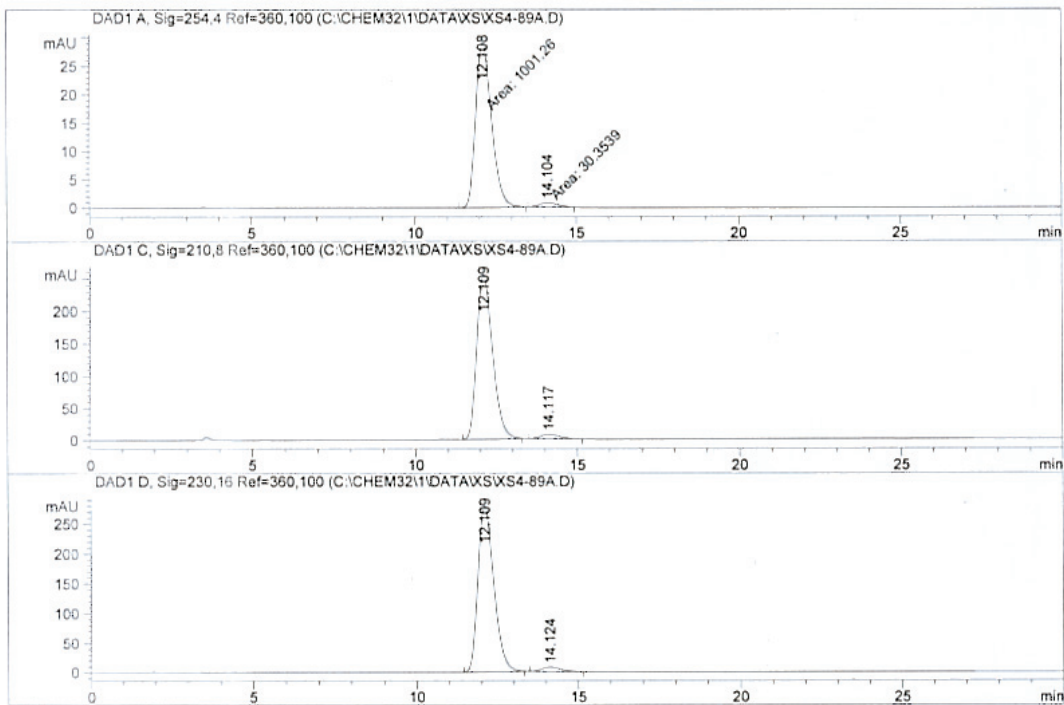

=====  
Area Percent Report  
=====

Sorted By : Signal  
Multiplier : 1.0000  
Dilution : 1.0000  
Sample Amount : 1.00000 [ng/ul] (not used in calc.)  
Use Multiplier & Dilution Factor with ISTDs

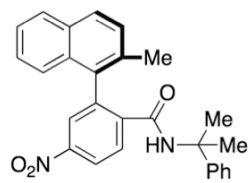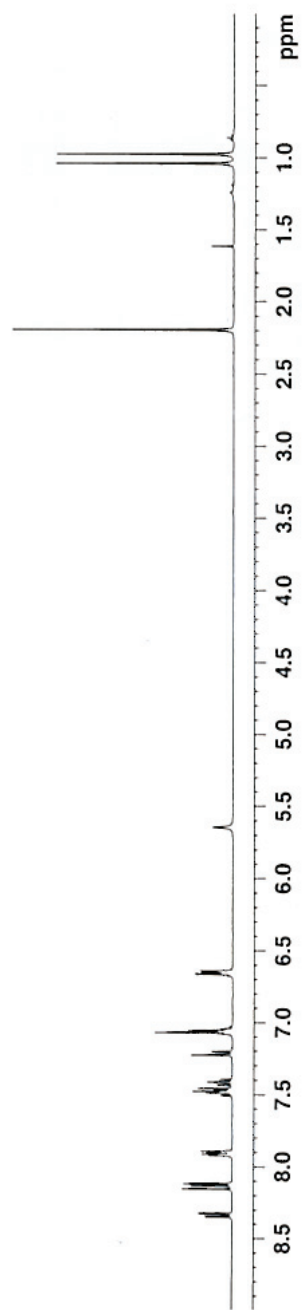

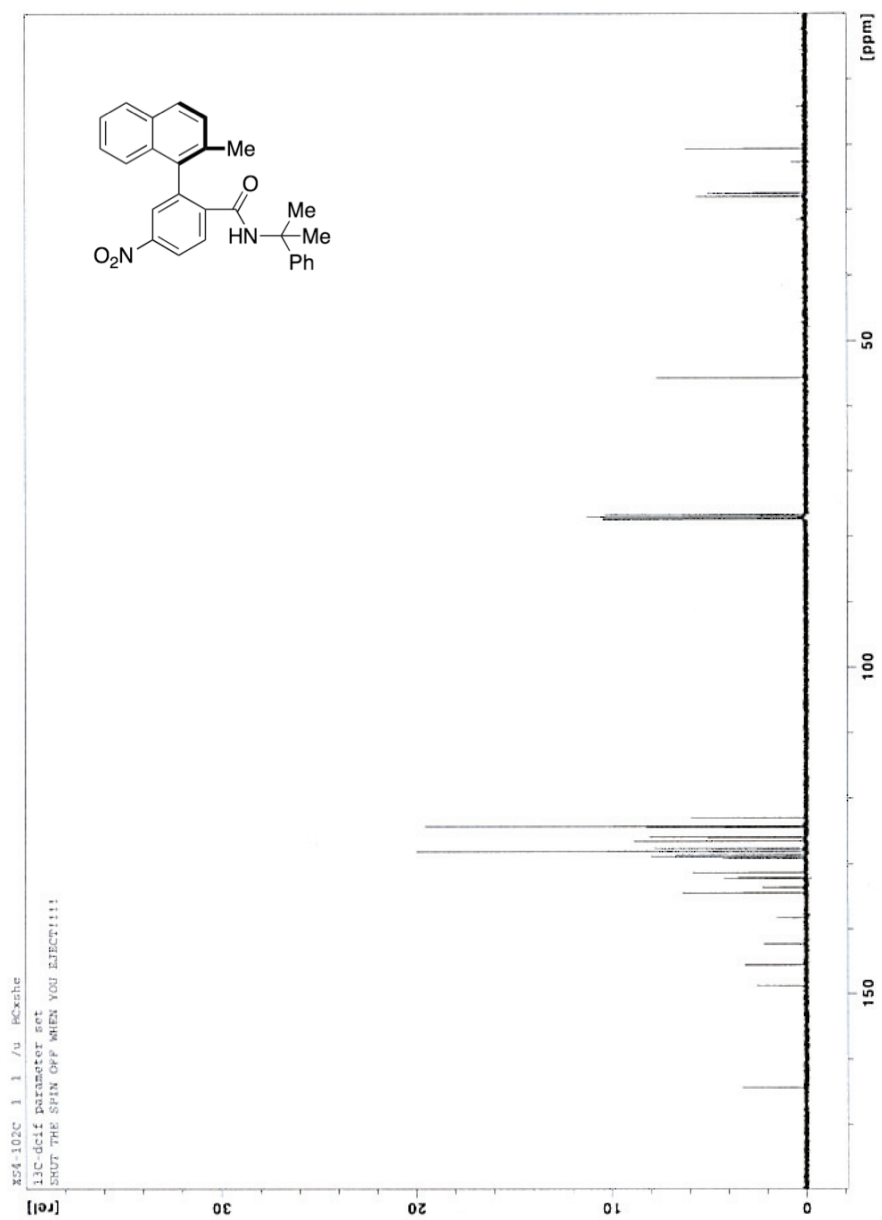

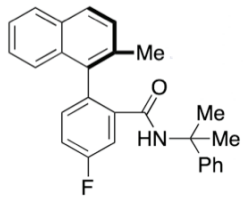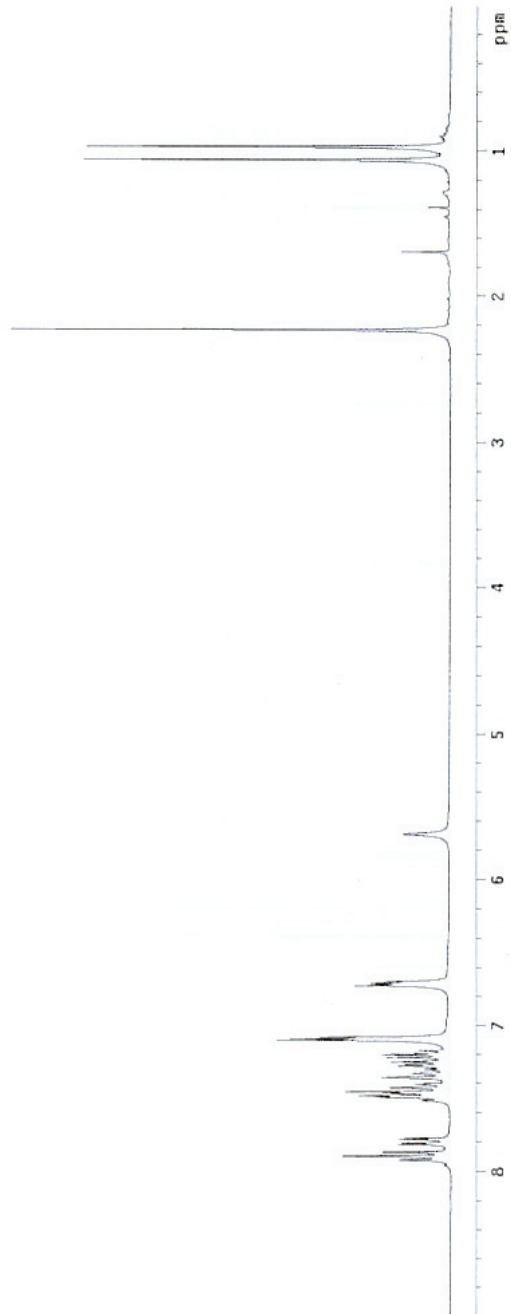

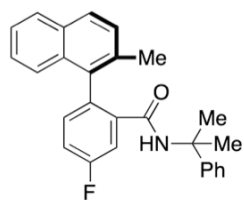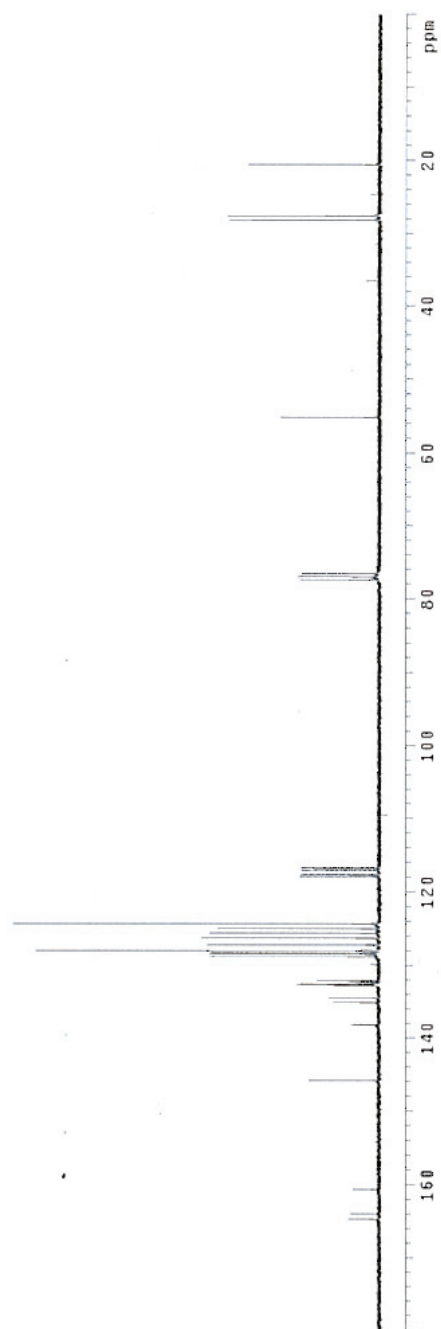

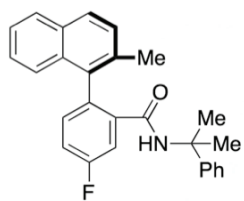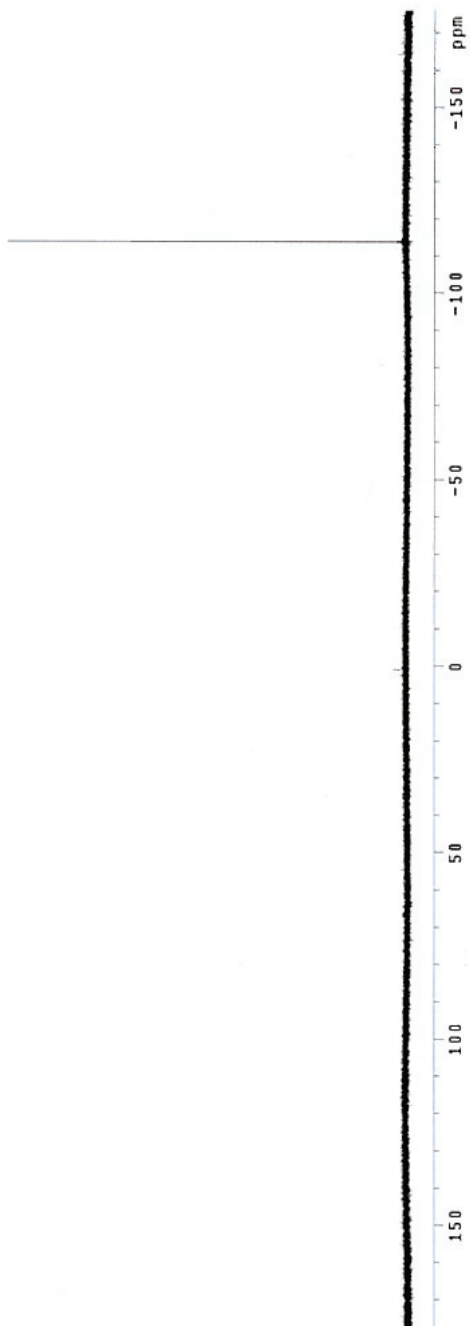

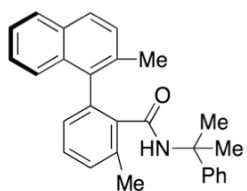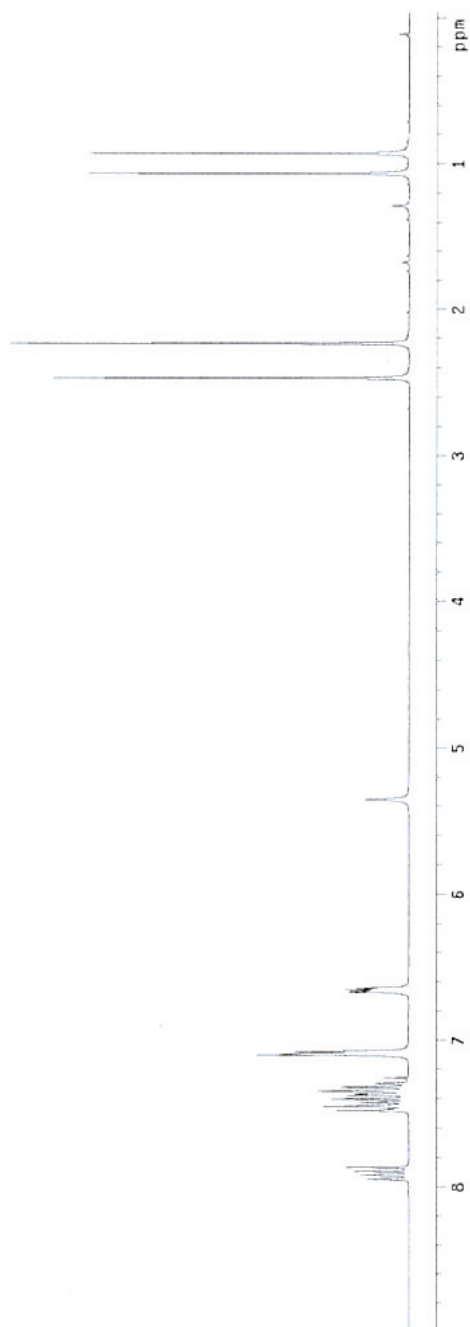

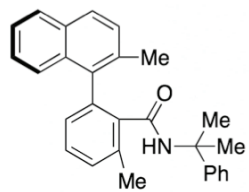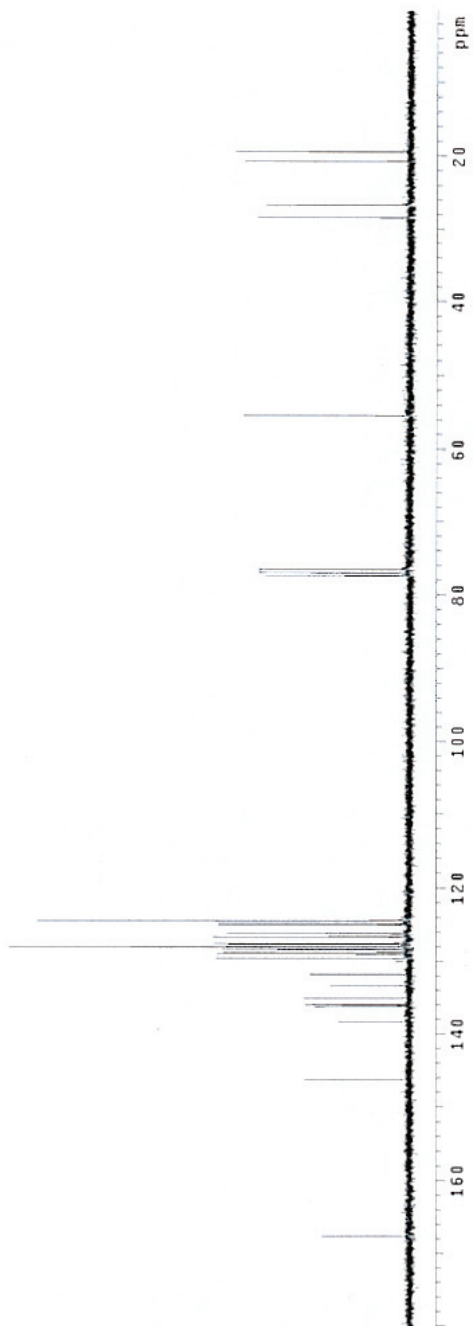



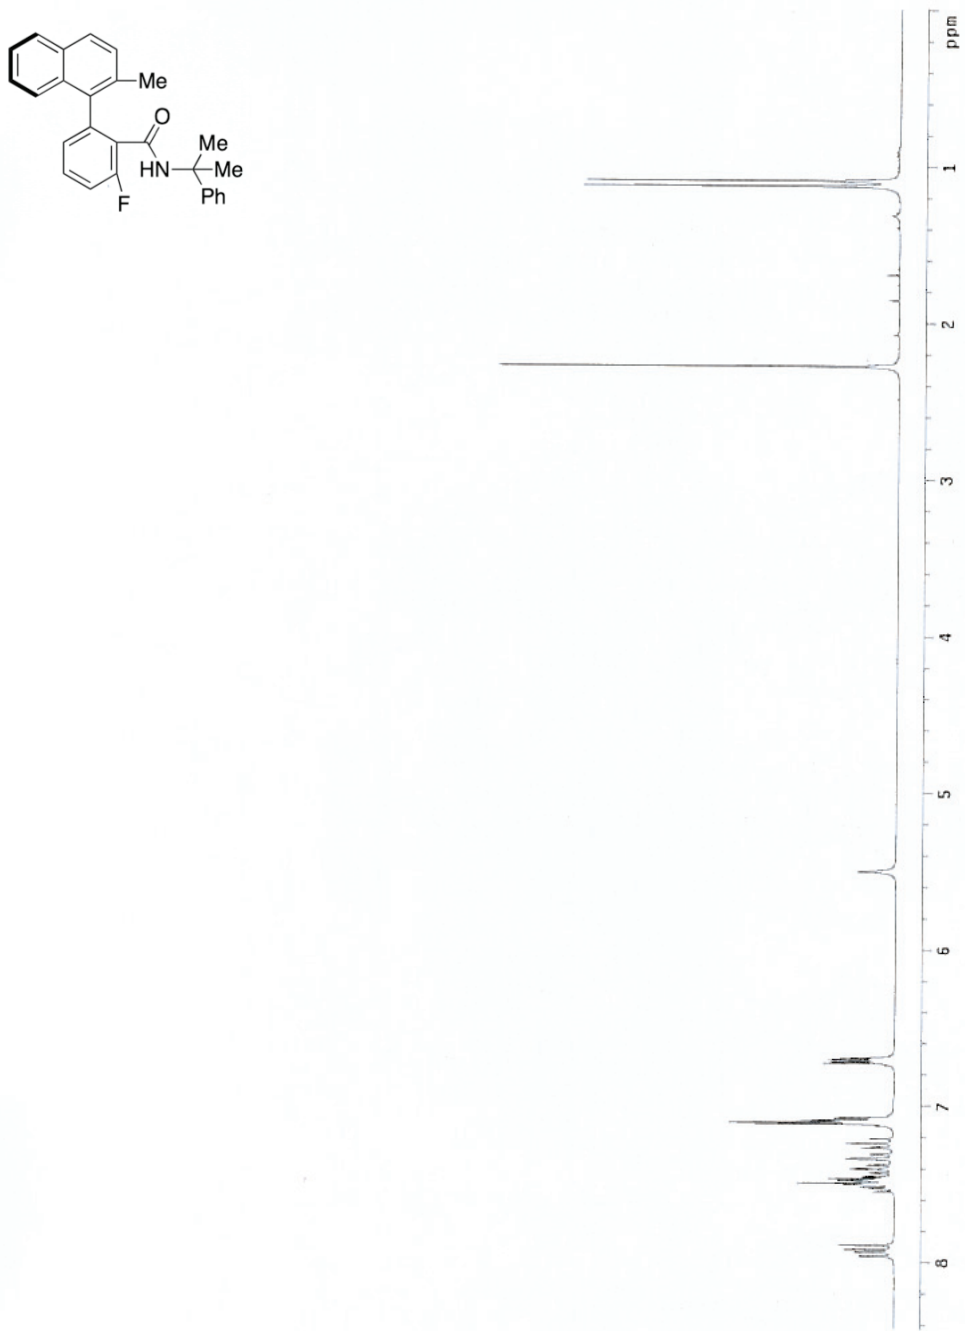

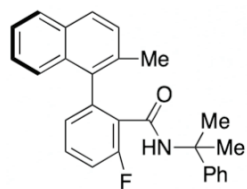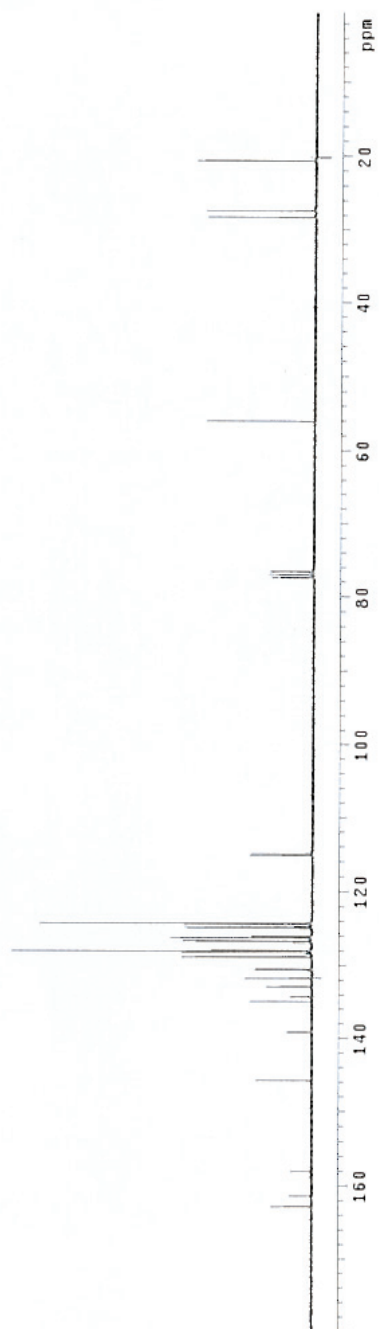

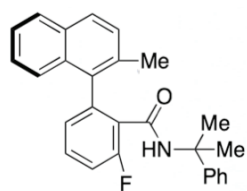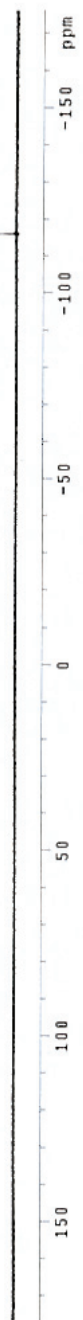

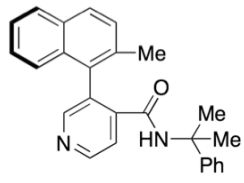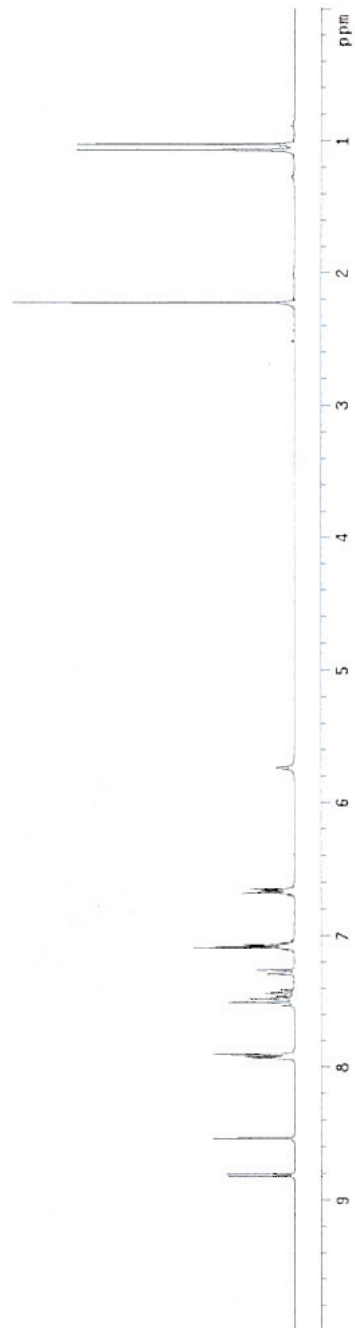

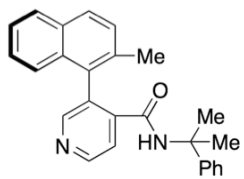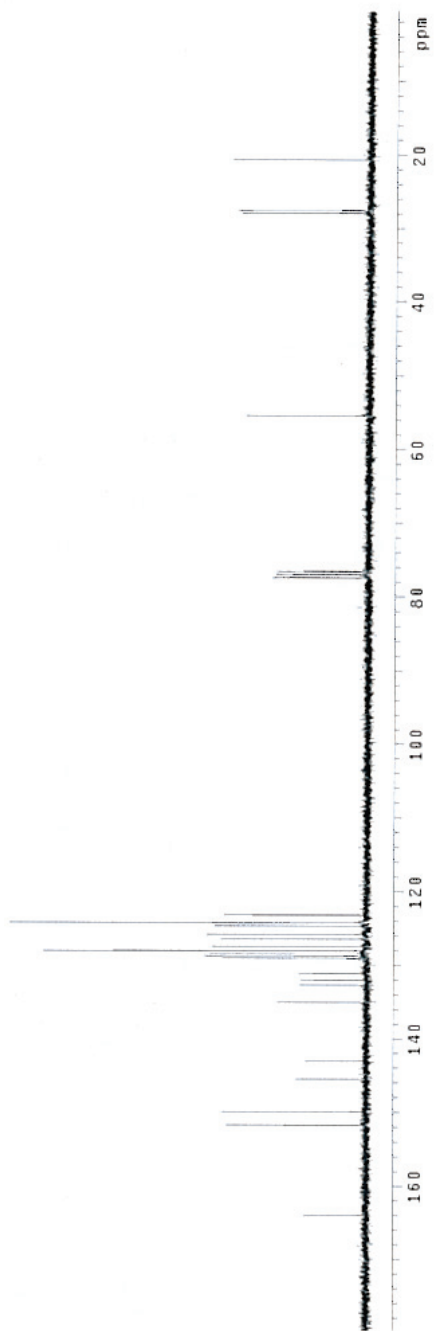

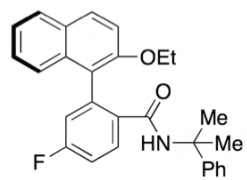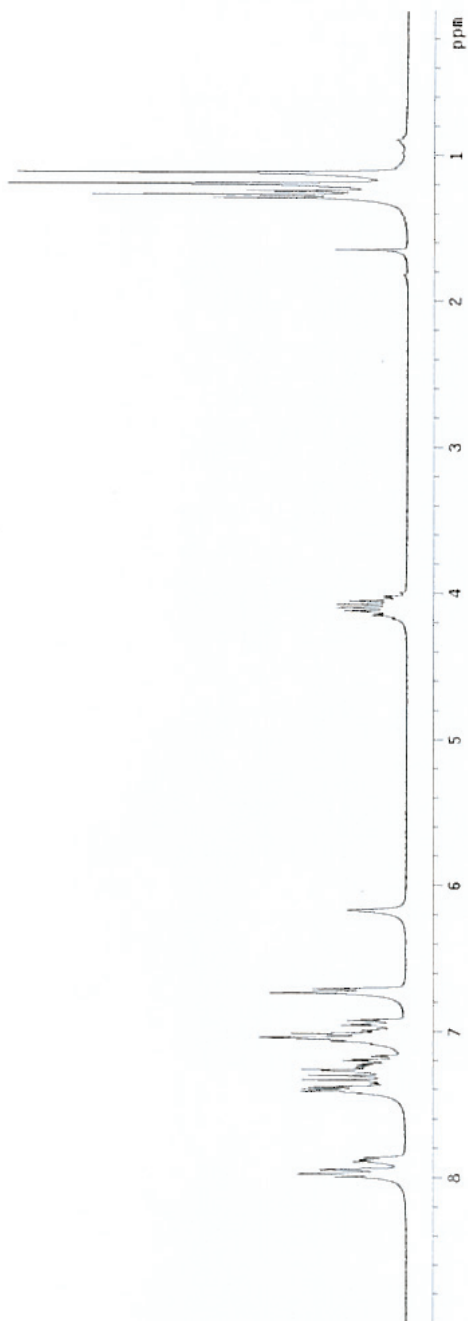

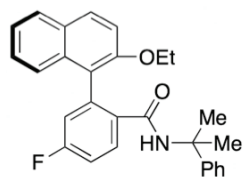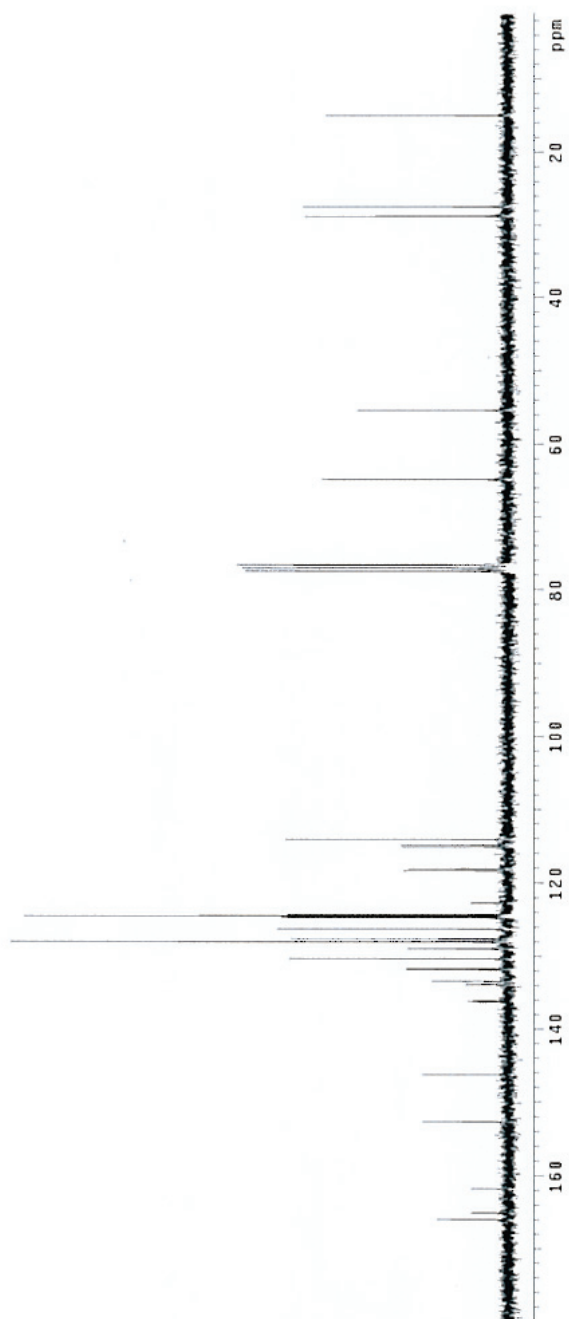

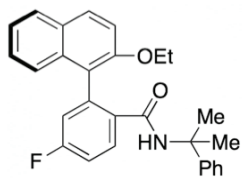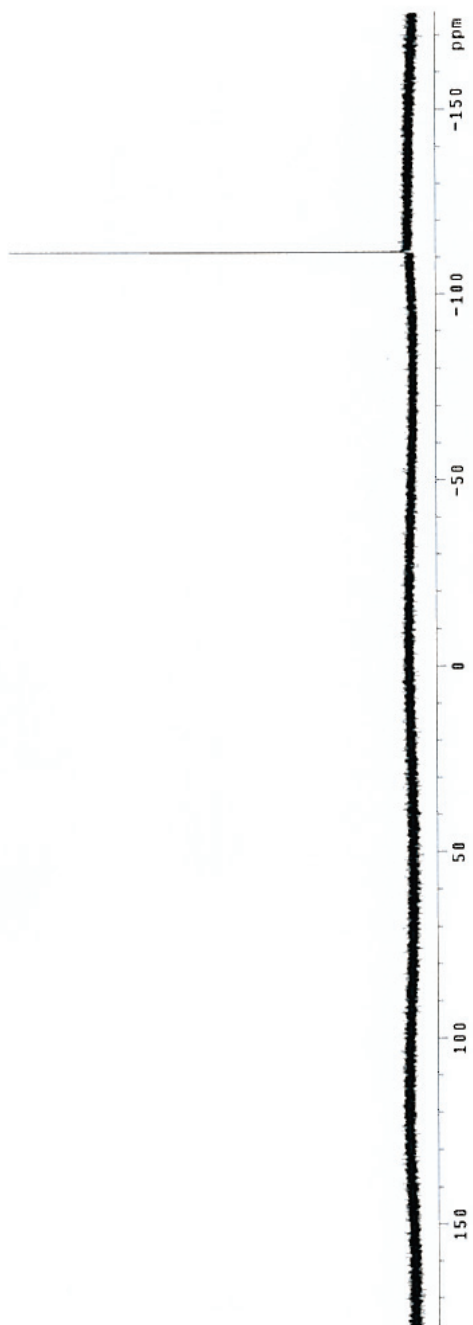



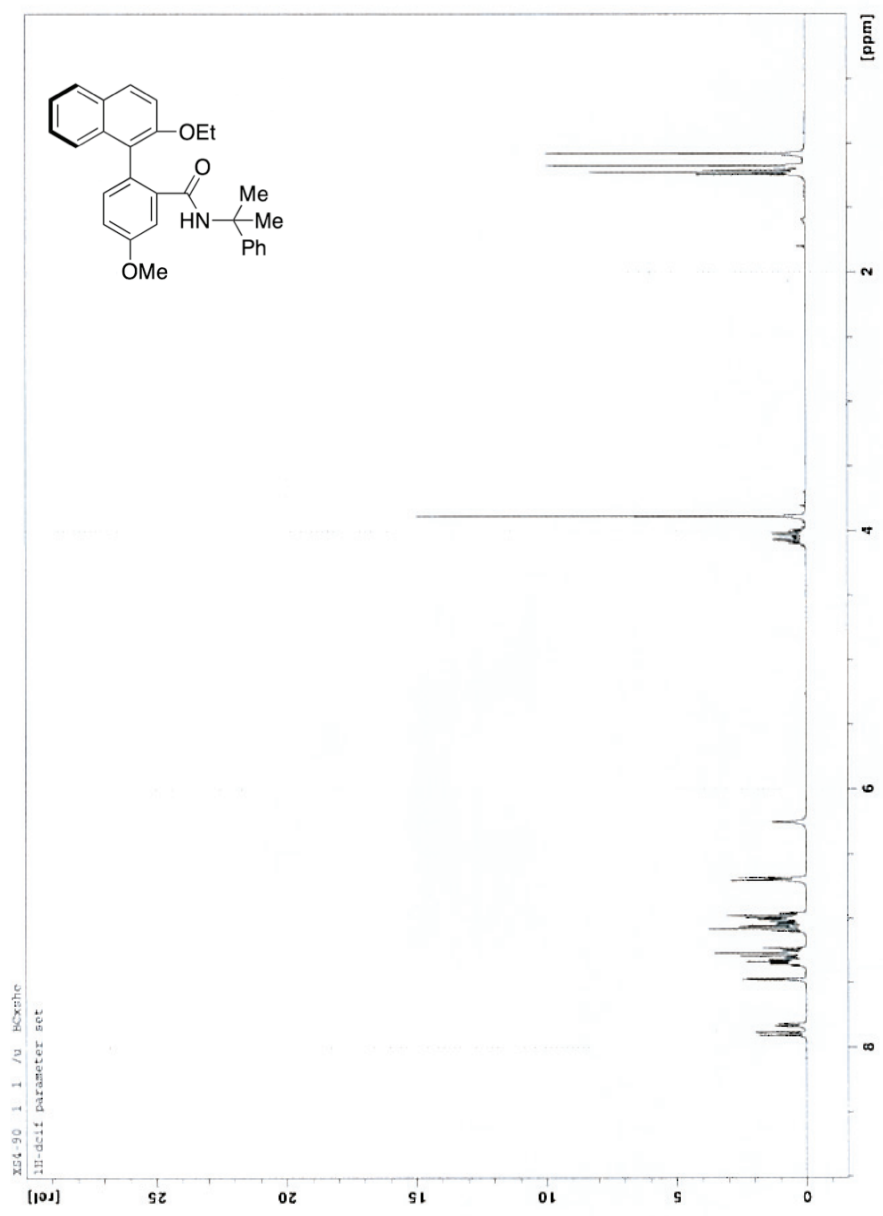

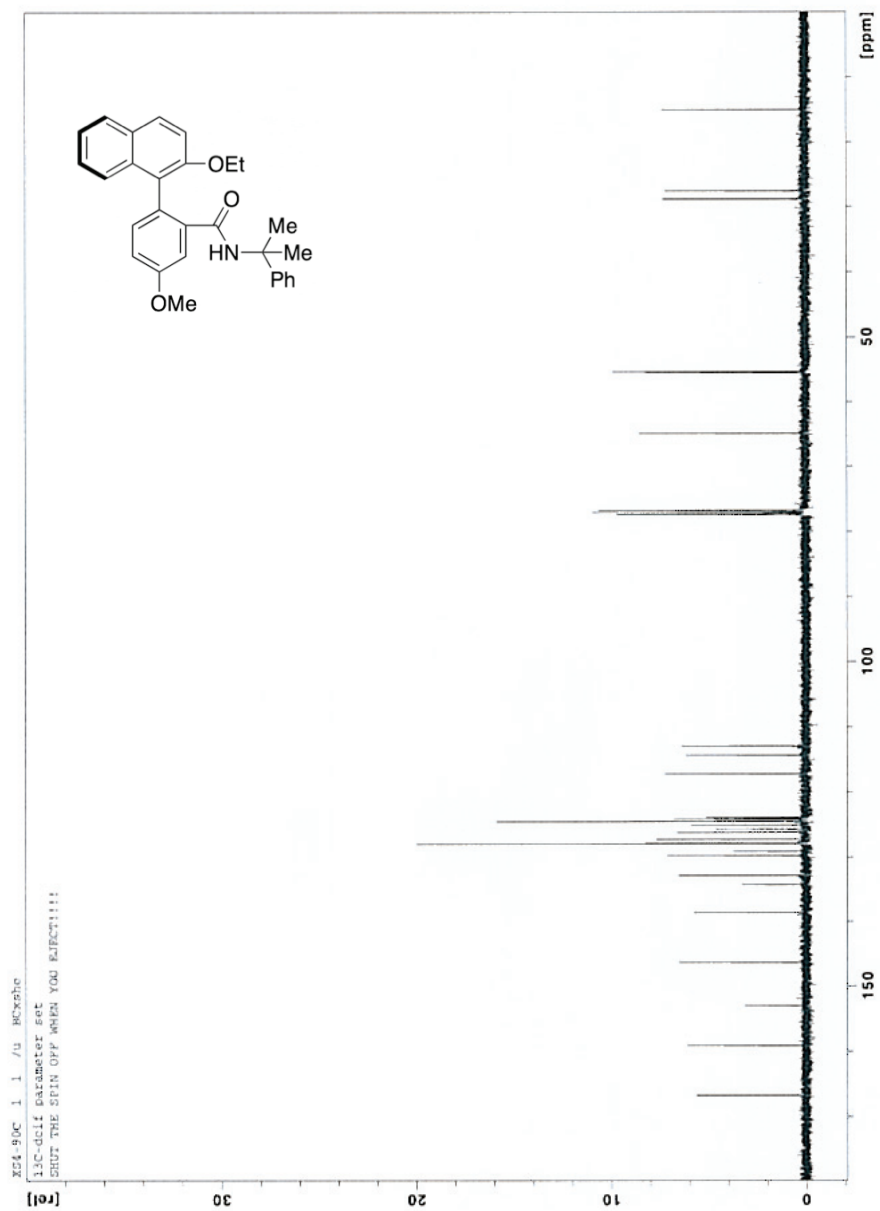

Data File C:\CHEM32\1\DATA\XS\XS2-191.D  
Sample Name: XS2-191

=====  
Acq. Operator : XS  
Acq. Instrument : Instrument 1 Location : Vial 91  
Injection Date : 7/10/2008 6:03:27 PM Inj Volume : 0.5 µl  
Acq. Method : C:\CHEM32\1\METHODS\AMTSTANDARD.M  
Last changed : 7/10/2008 6:02:40 PM by XS  
(modified after loading)  
Analysis Method : C:\CHEM32\1\DATA\XS\XS2-191.D\DA.M (AMTSTANDARD.M)  
Last changed : 7/10/2008 6:13:52 PM by XS  
Method Info : 60% n-Hexane  
40% i-propanol  
0.5 ml/min

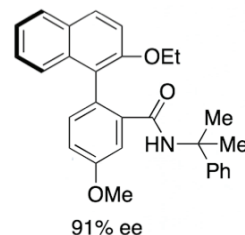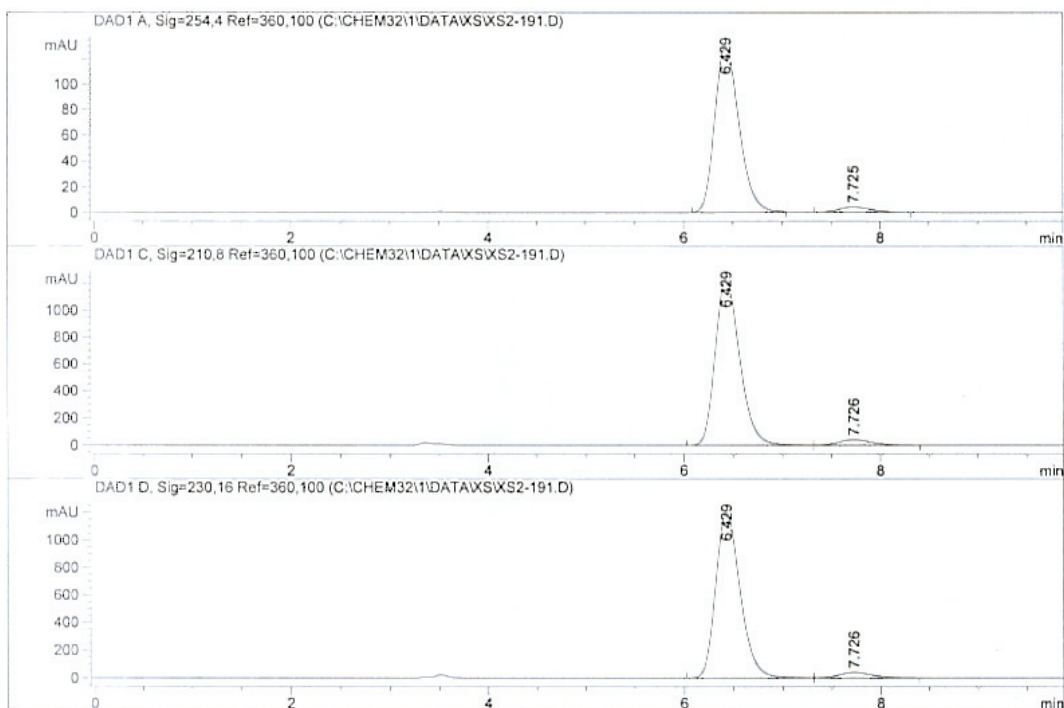

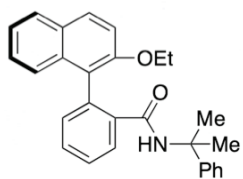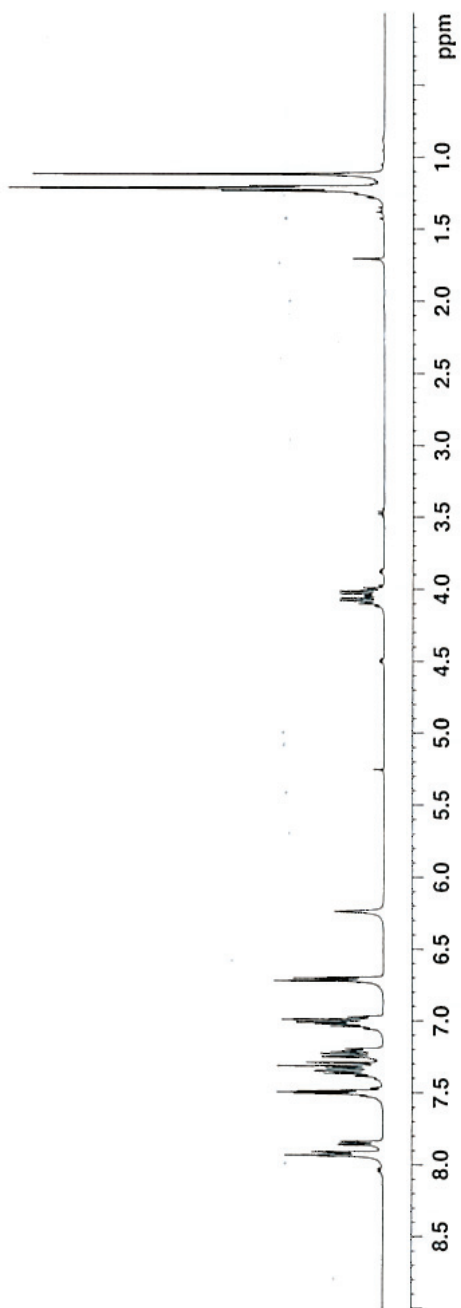

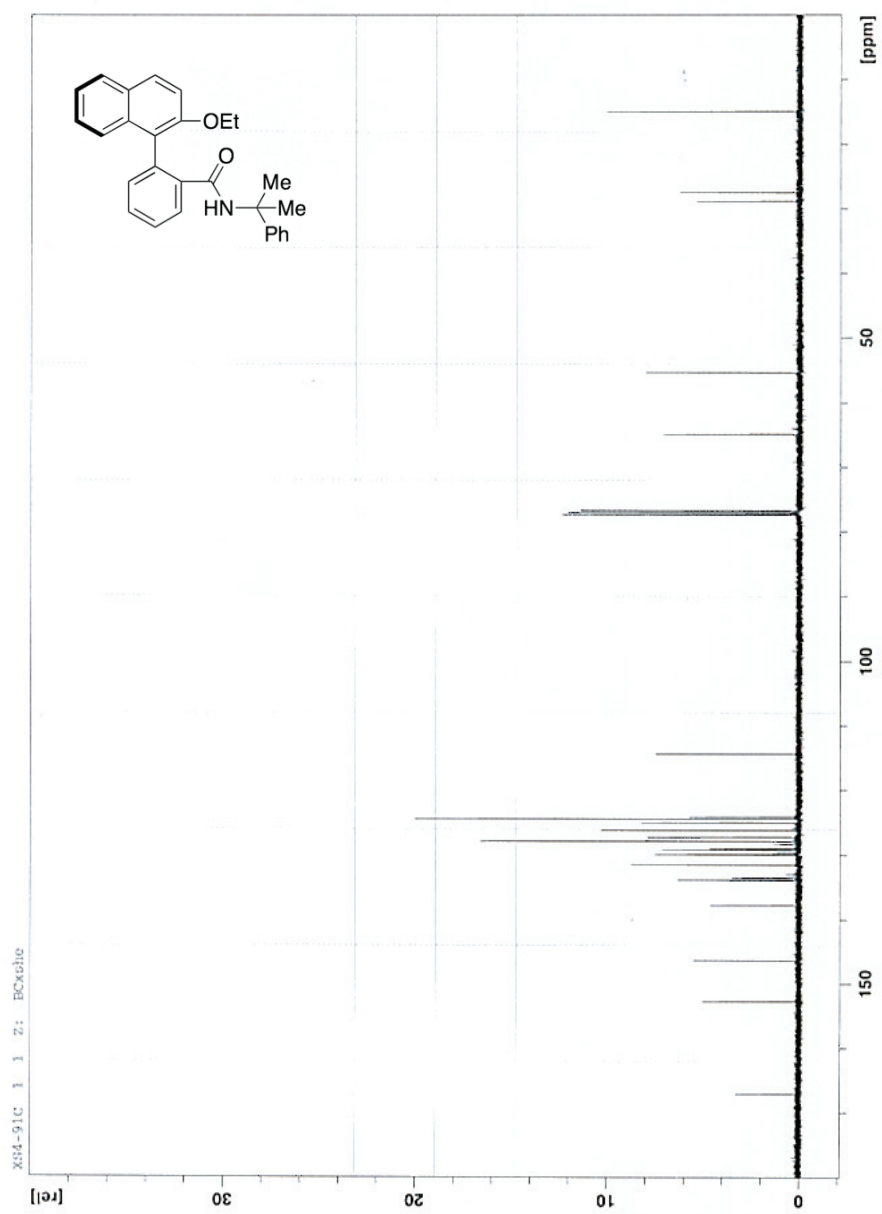

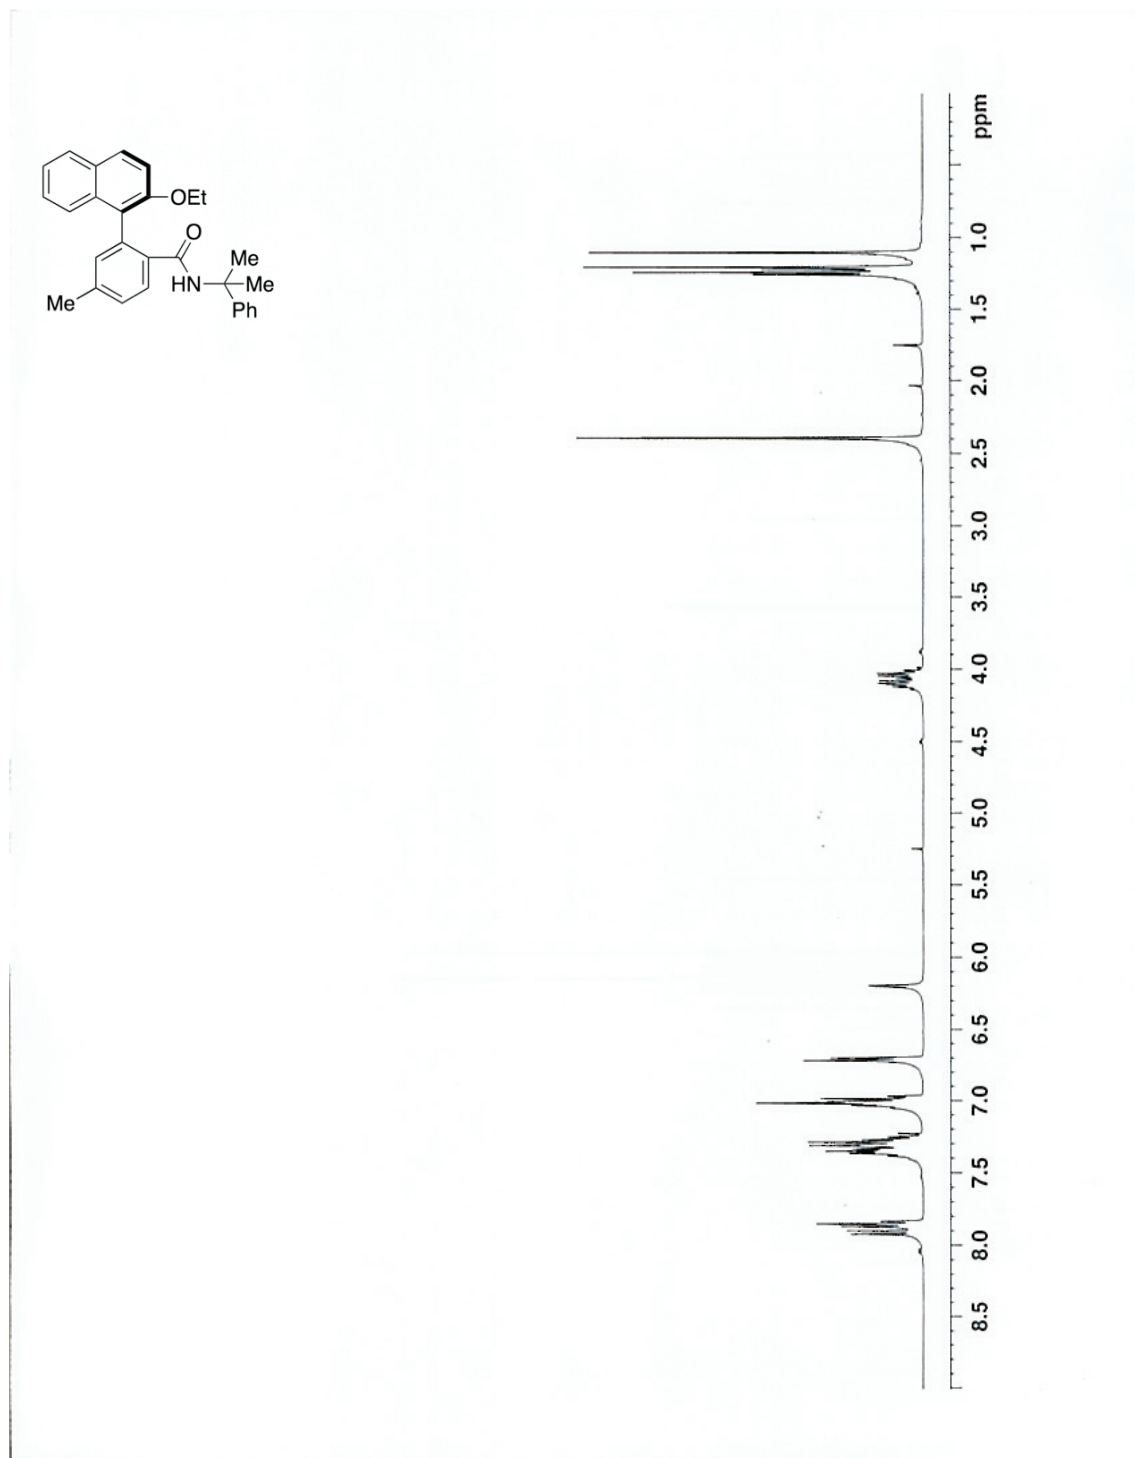

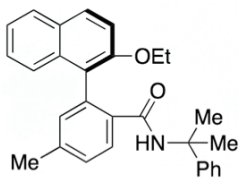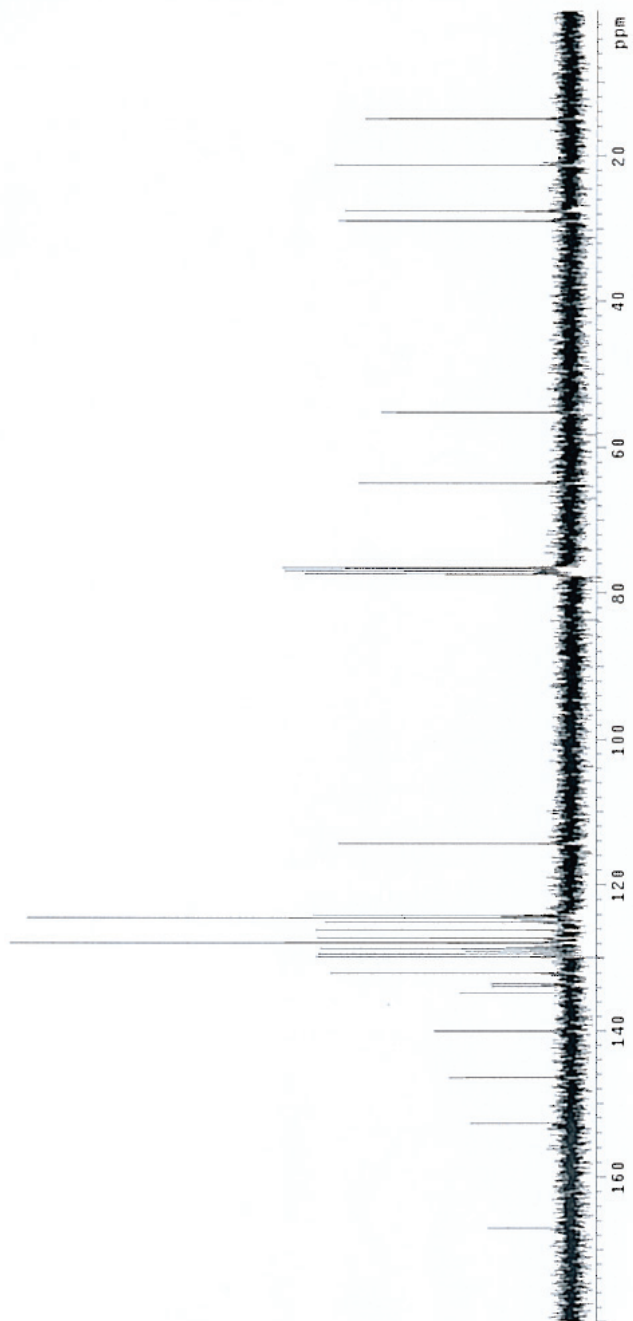

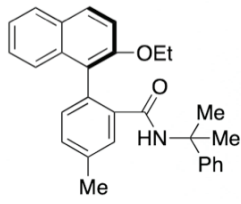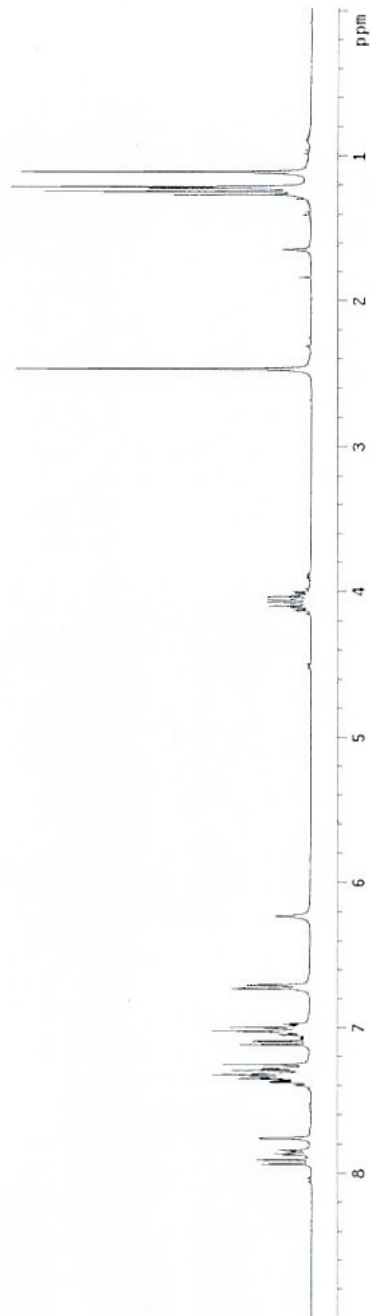



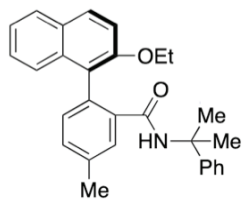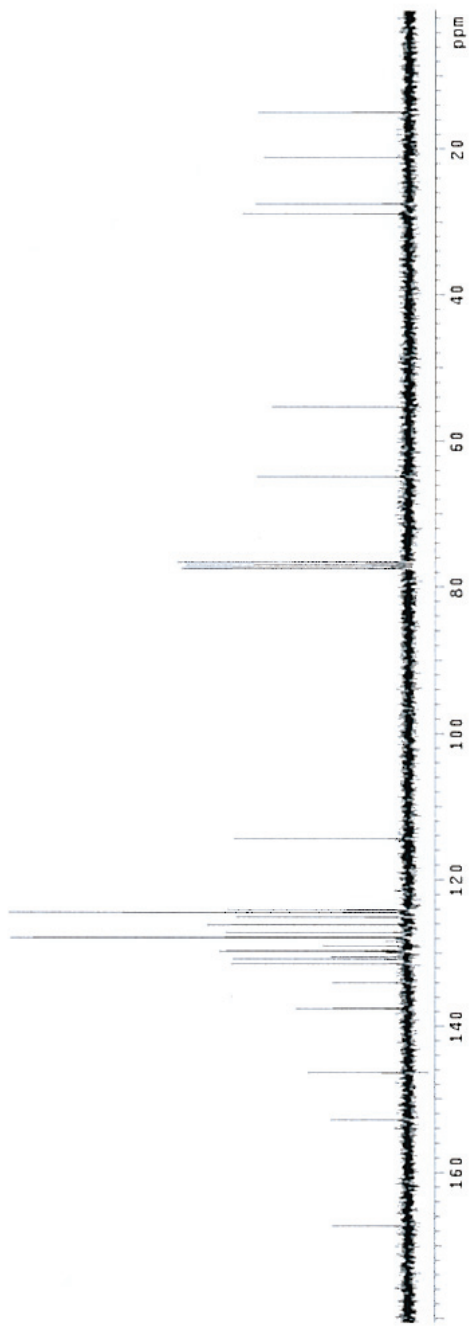

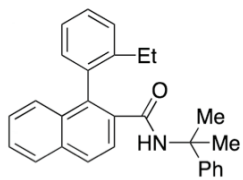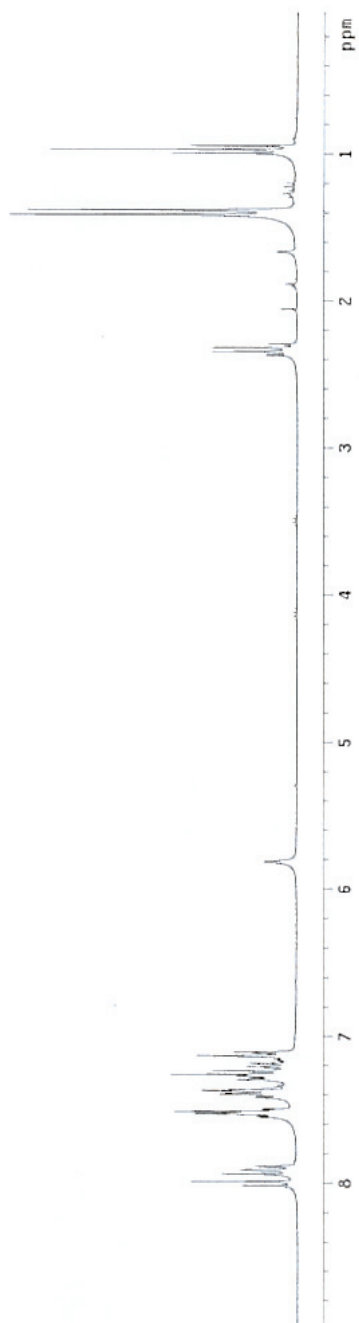

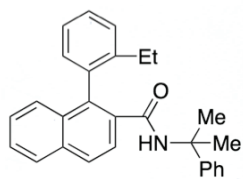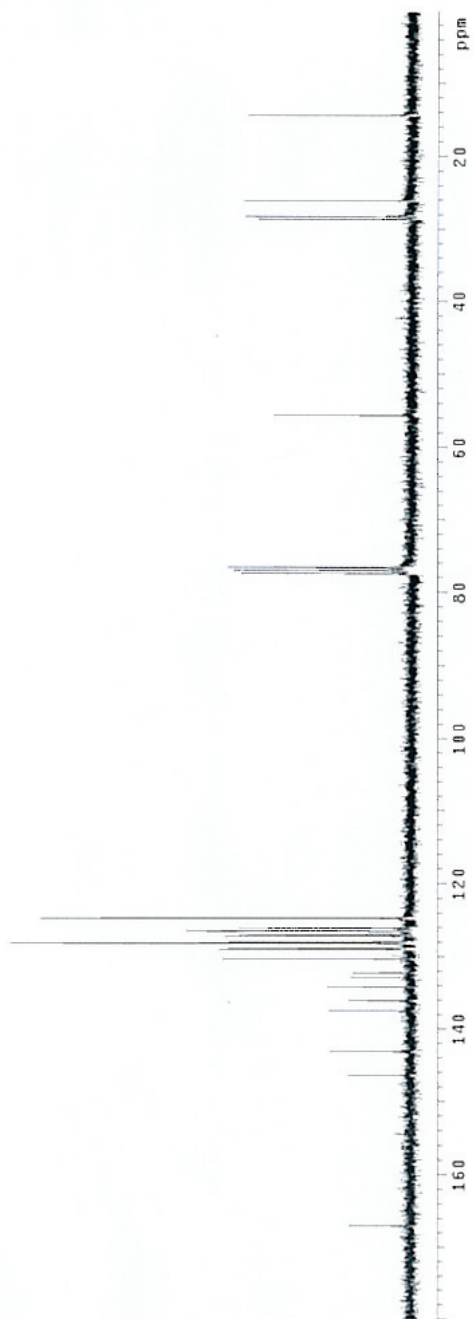

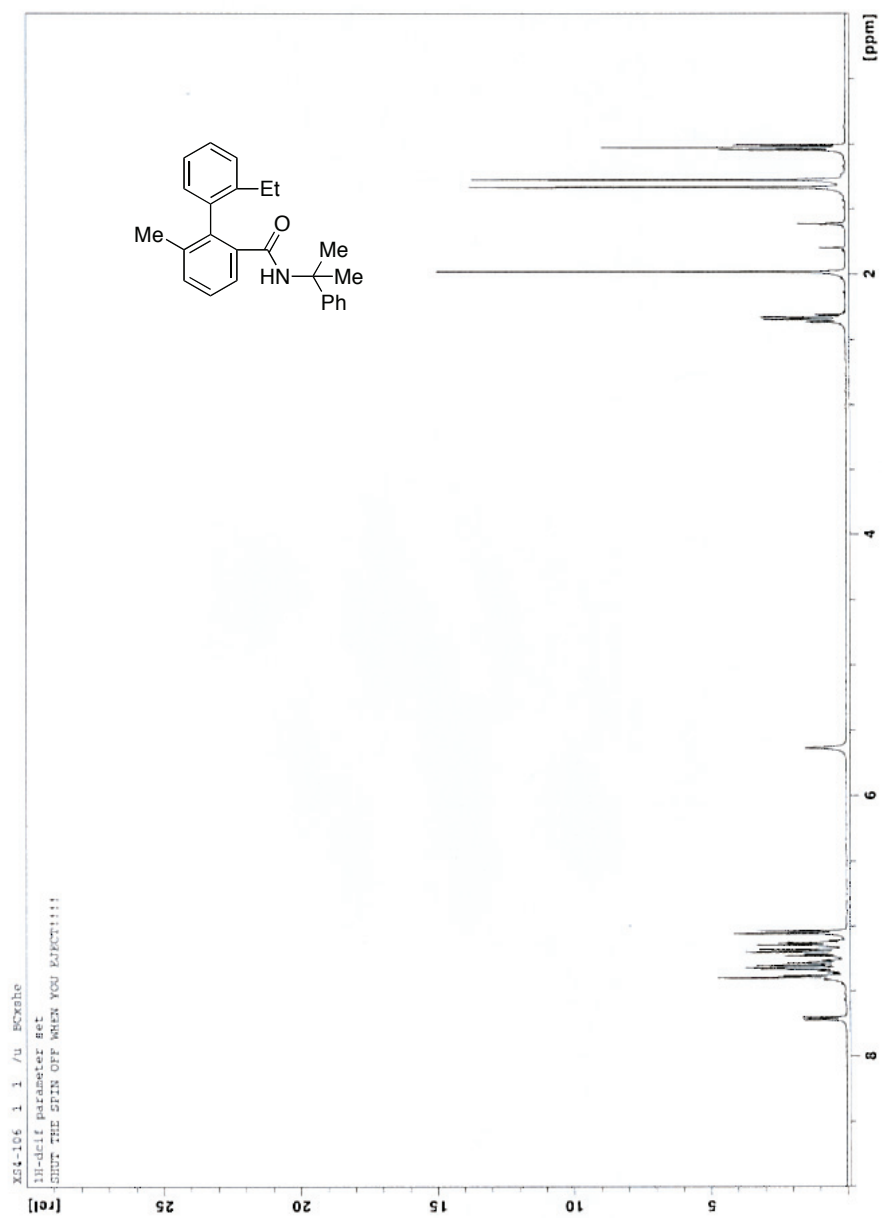

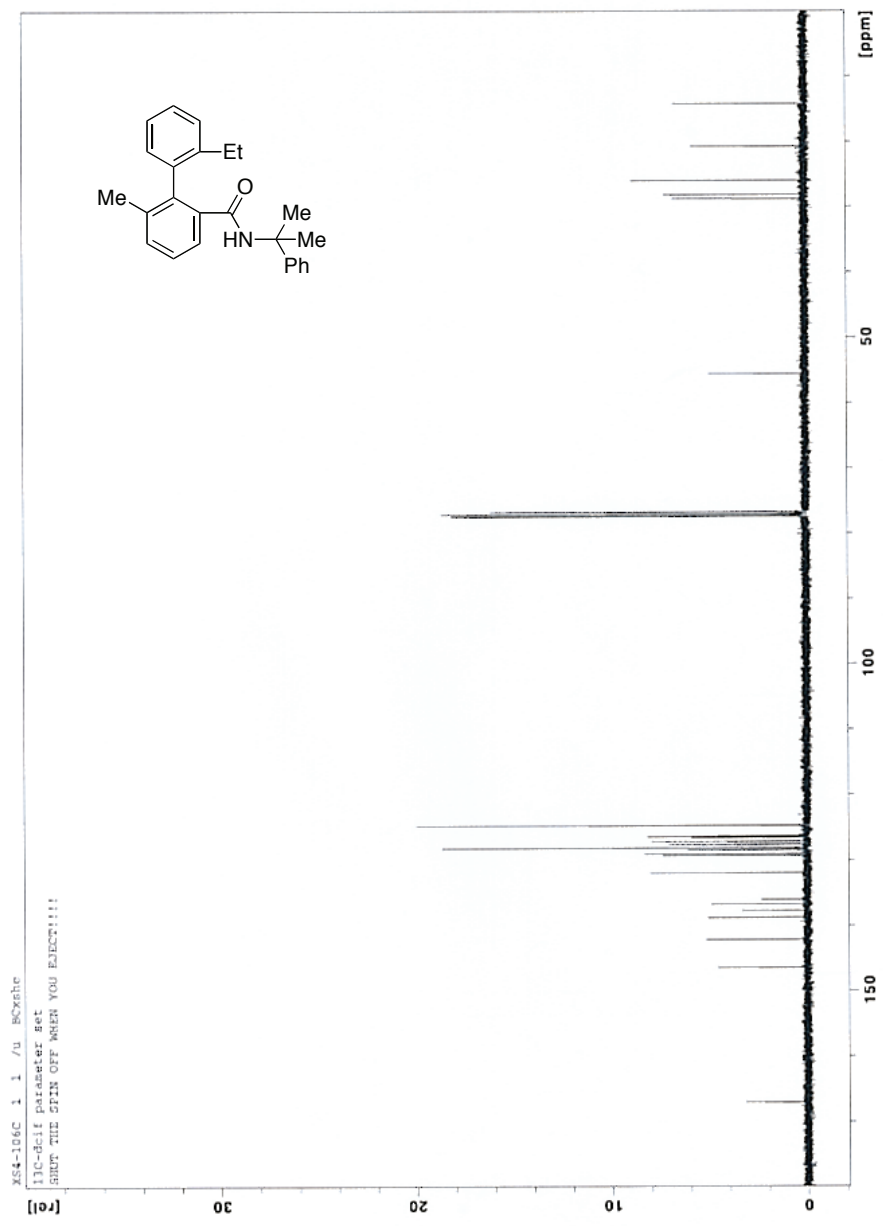

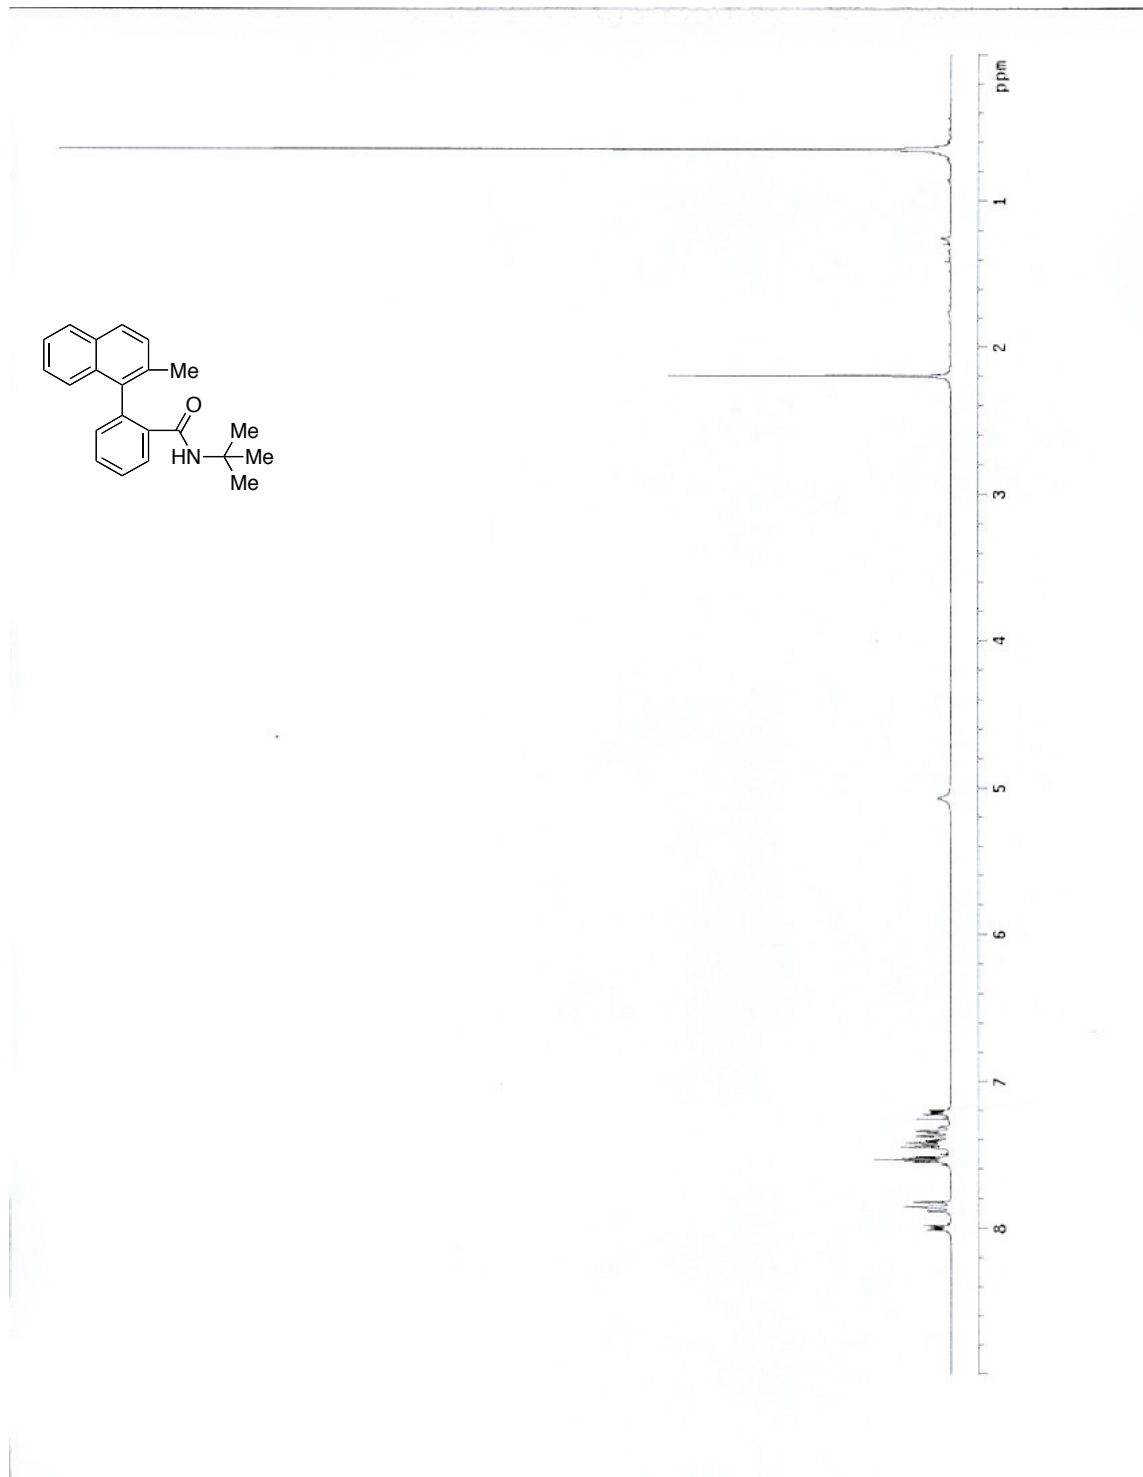

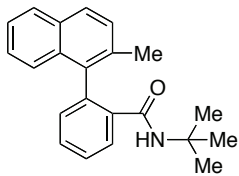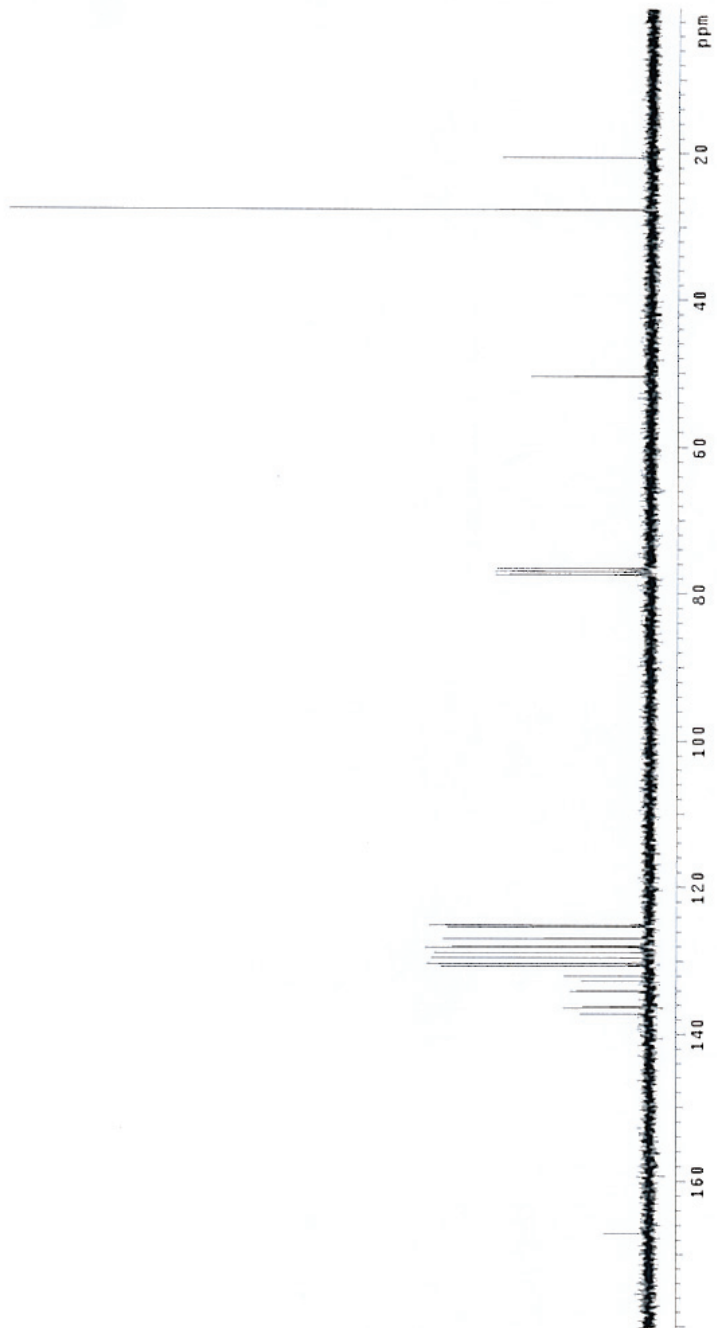

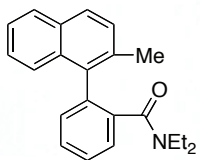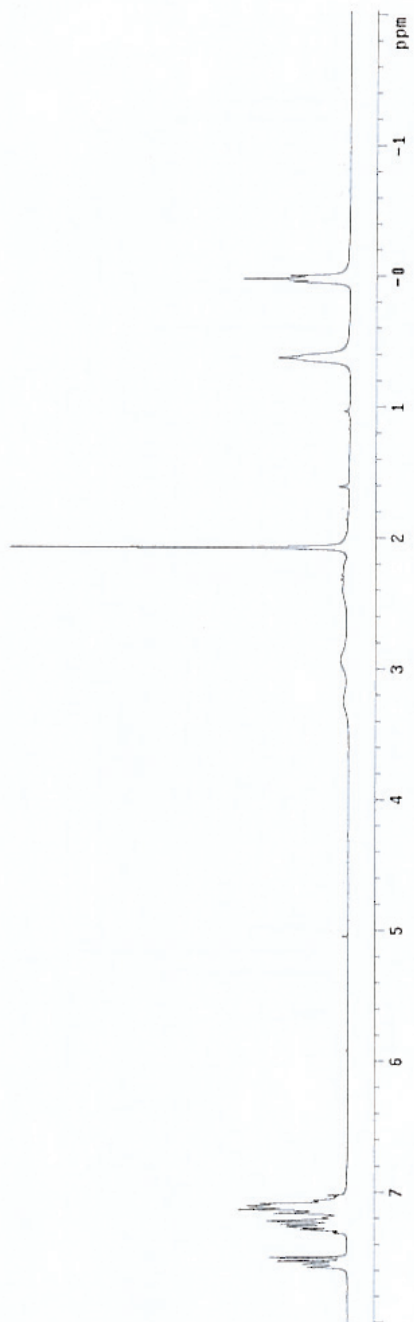



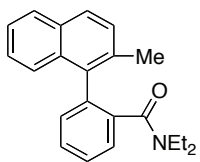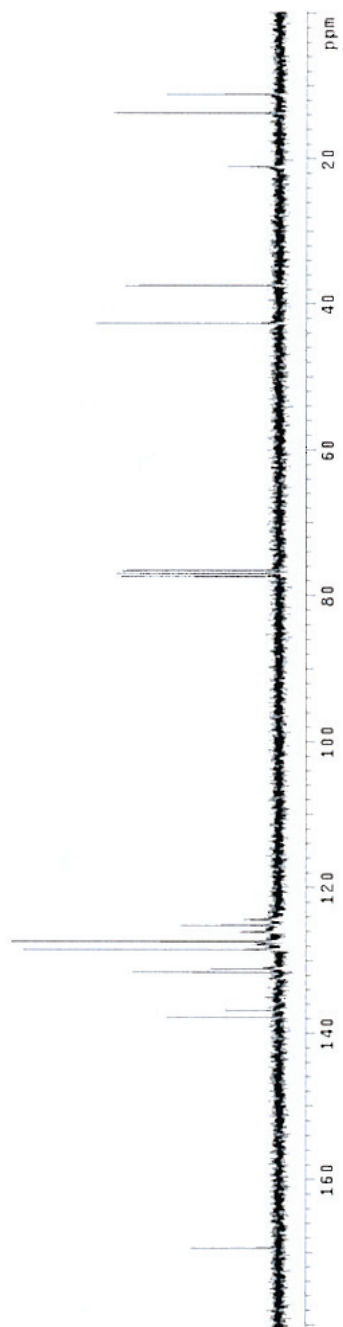

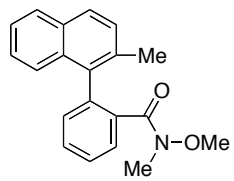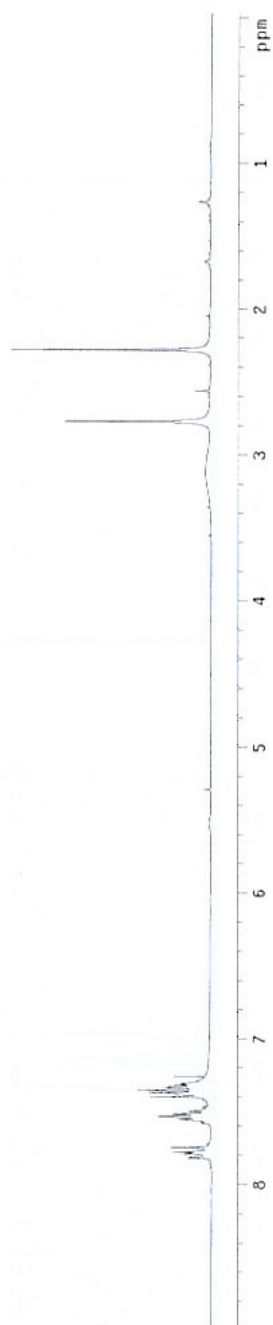

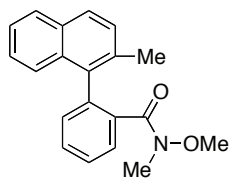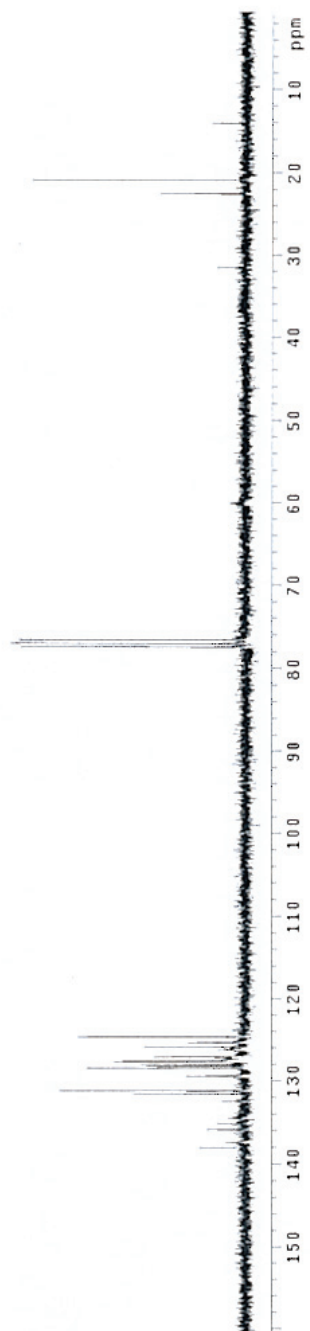

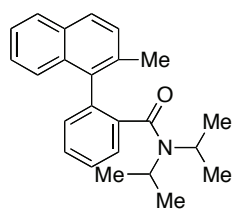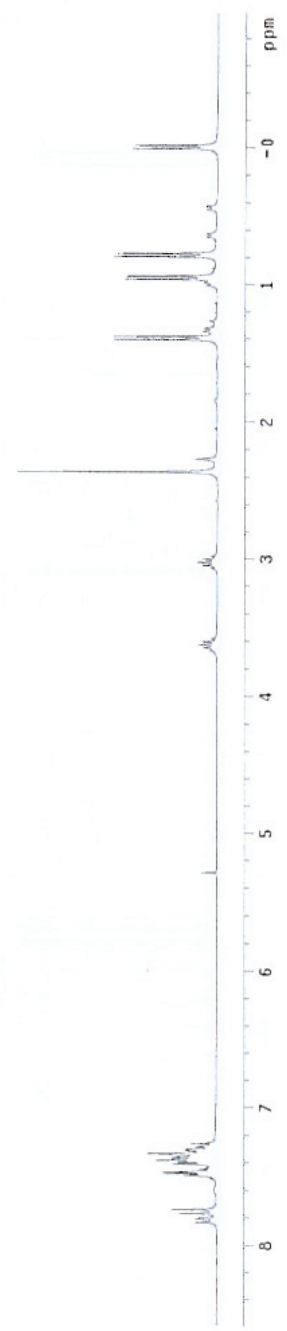

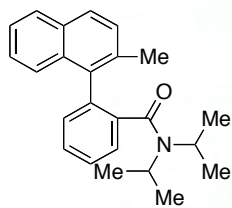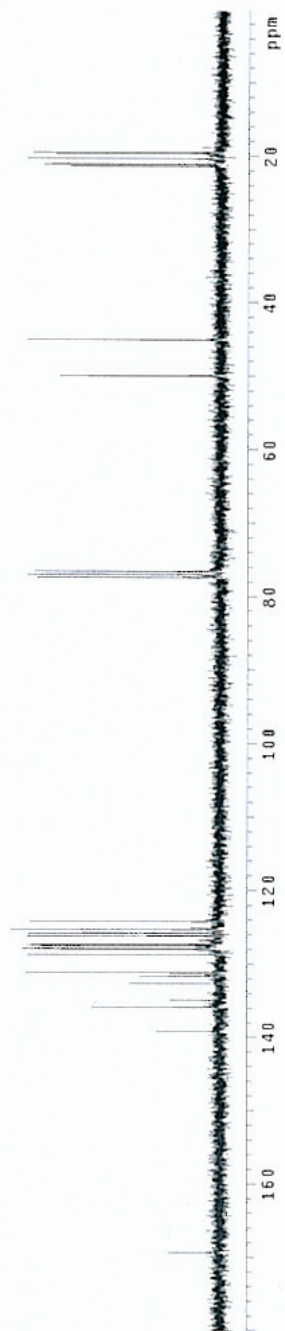

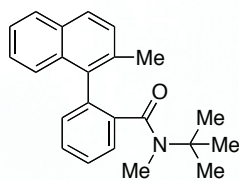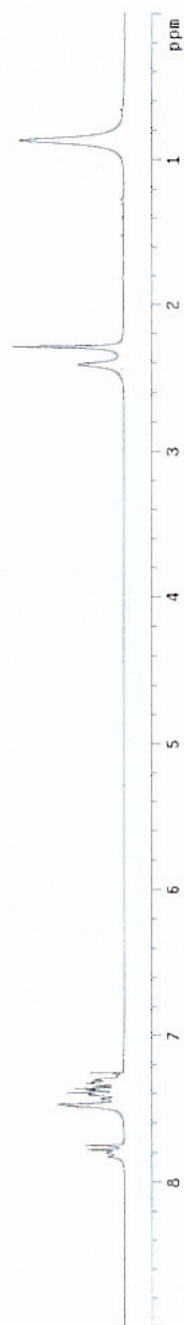

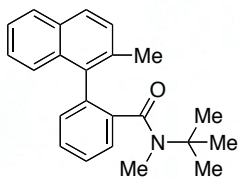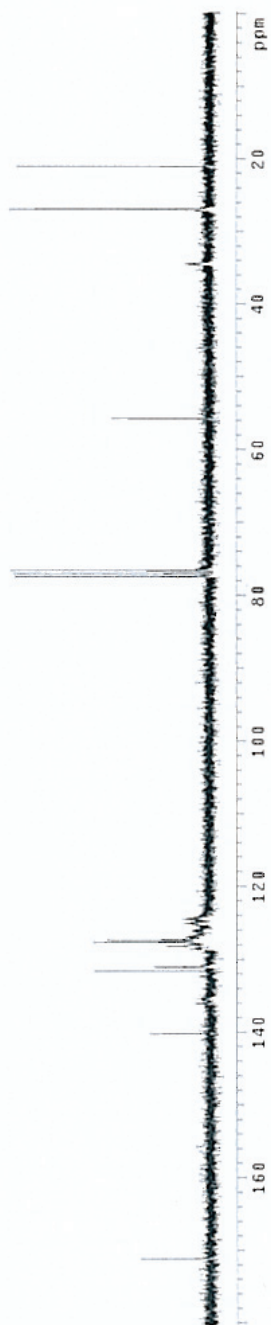

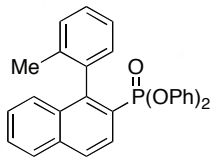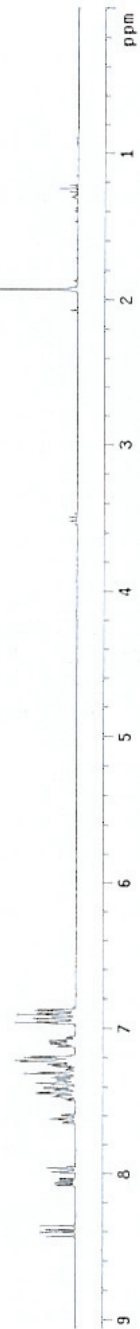



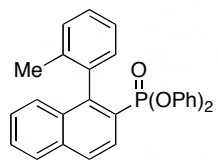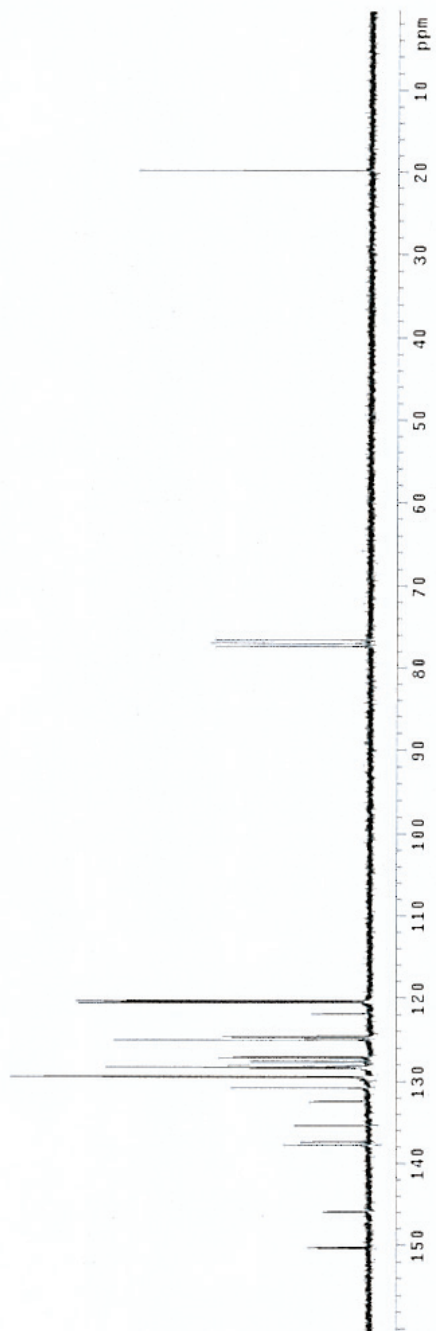

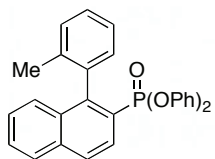

100 80 60 40 20 0 -20 -40 -60 ppm

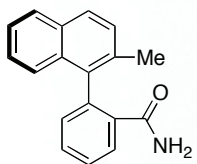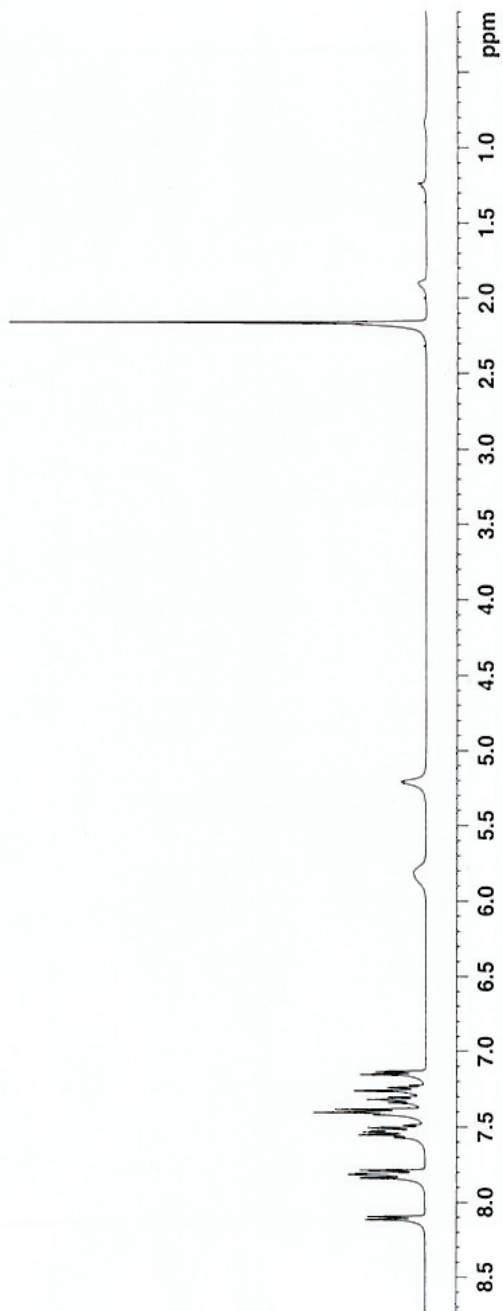

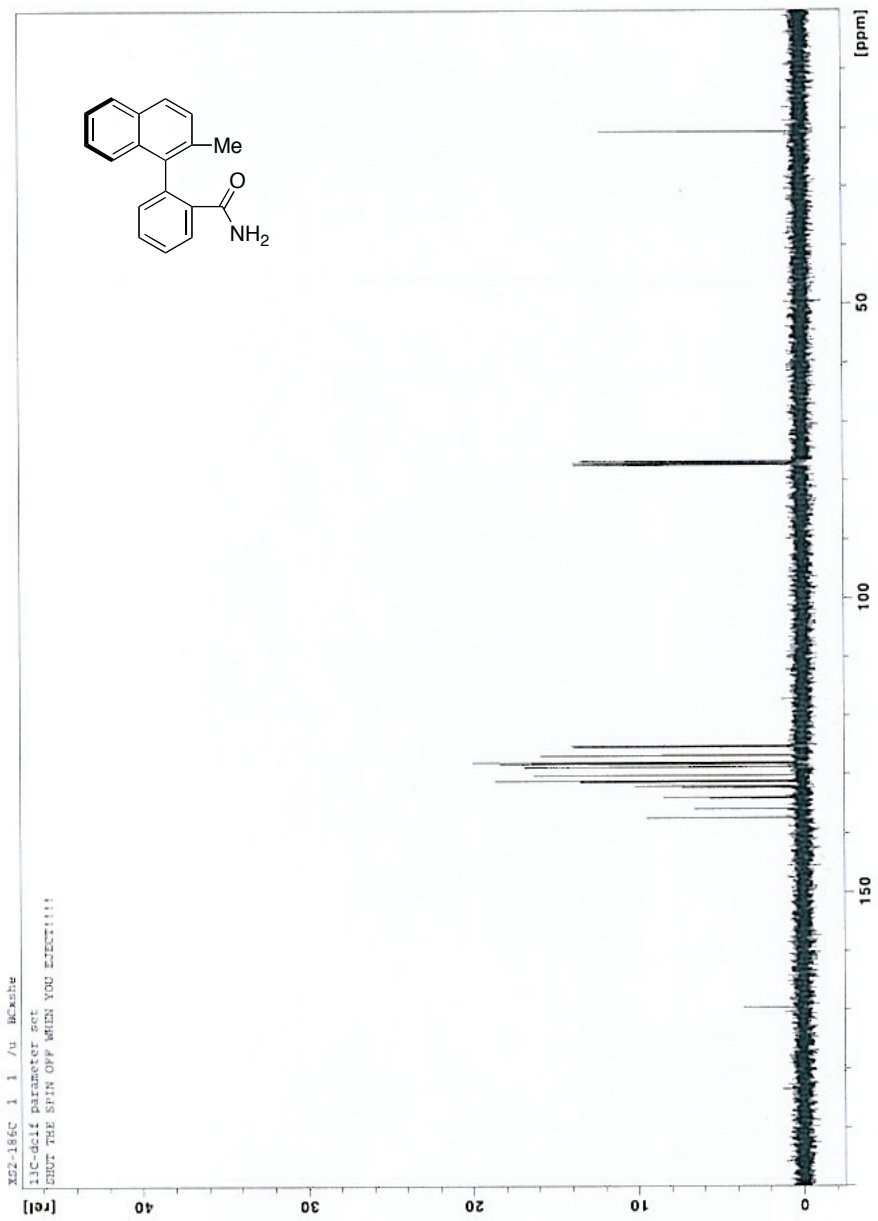

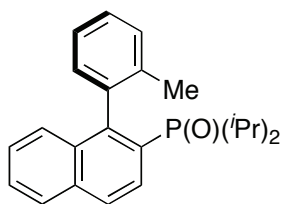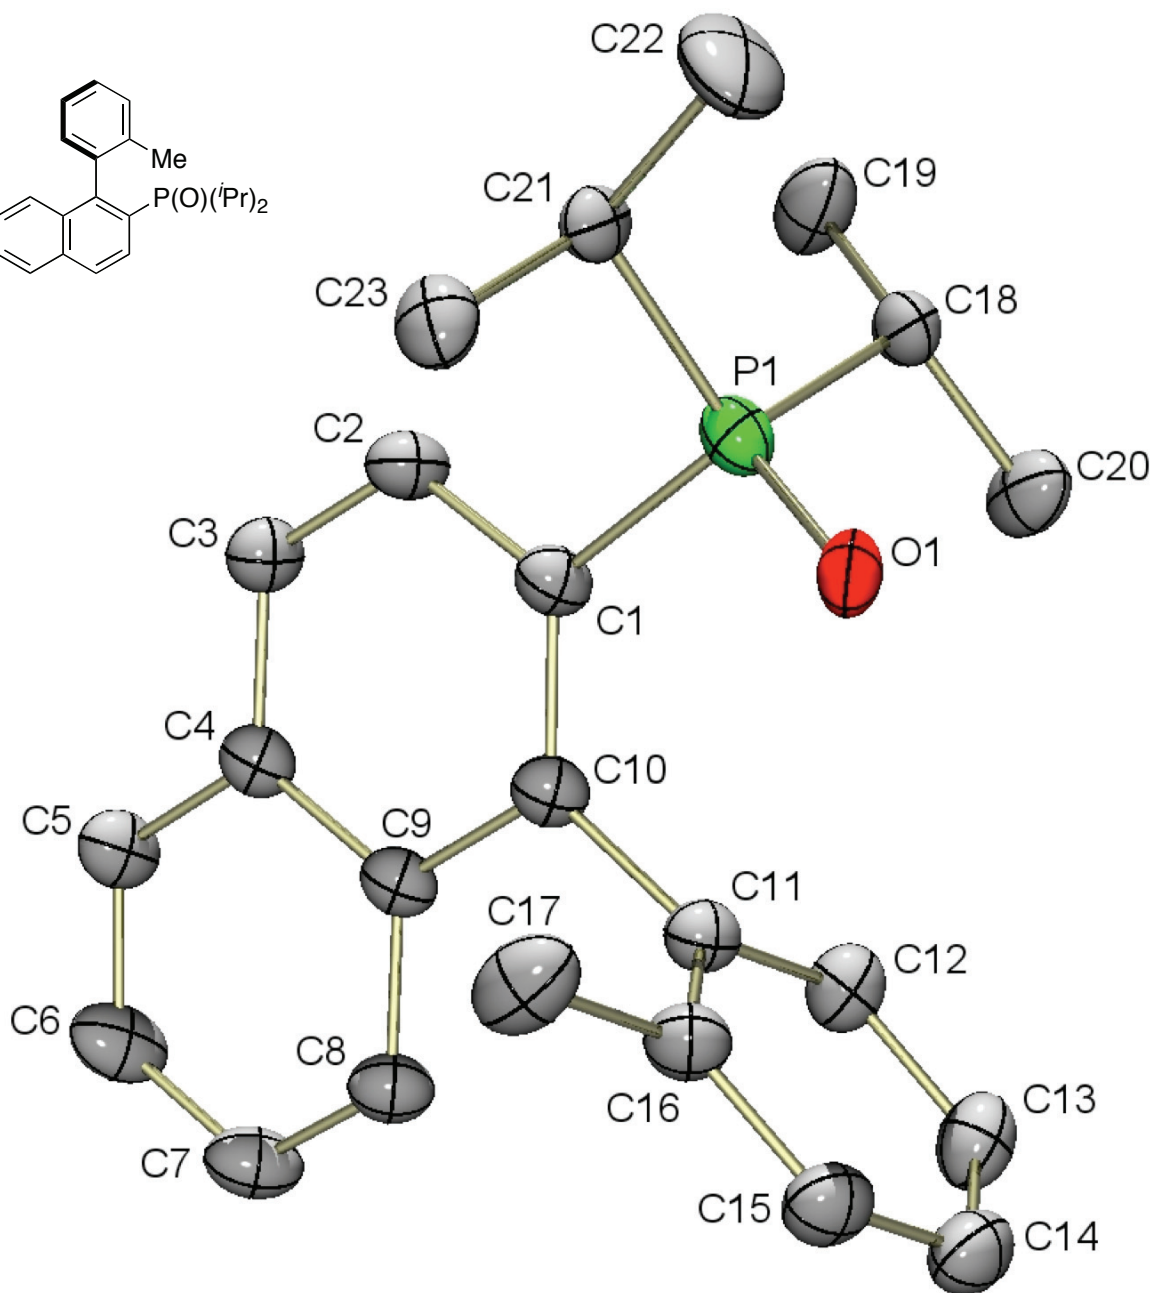

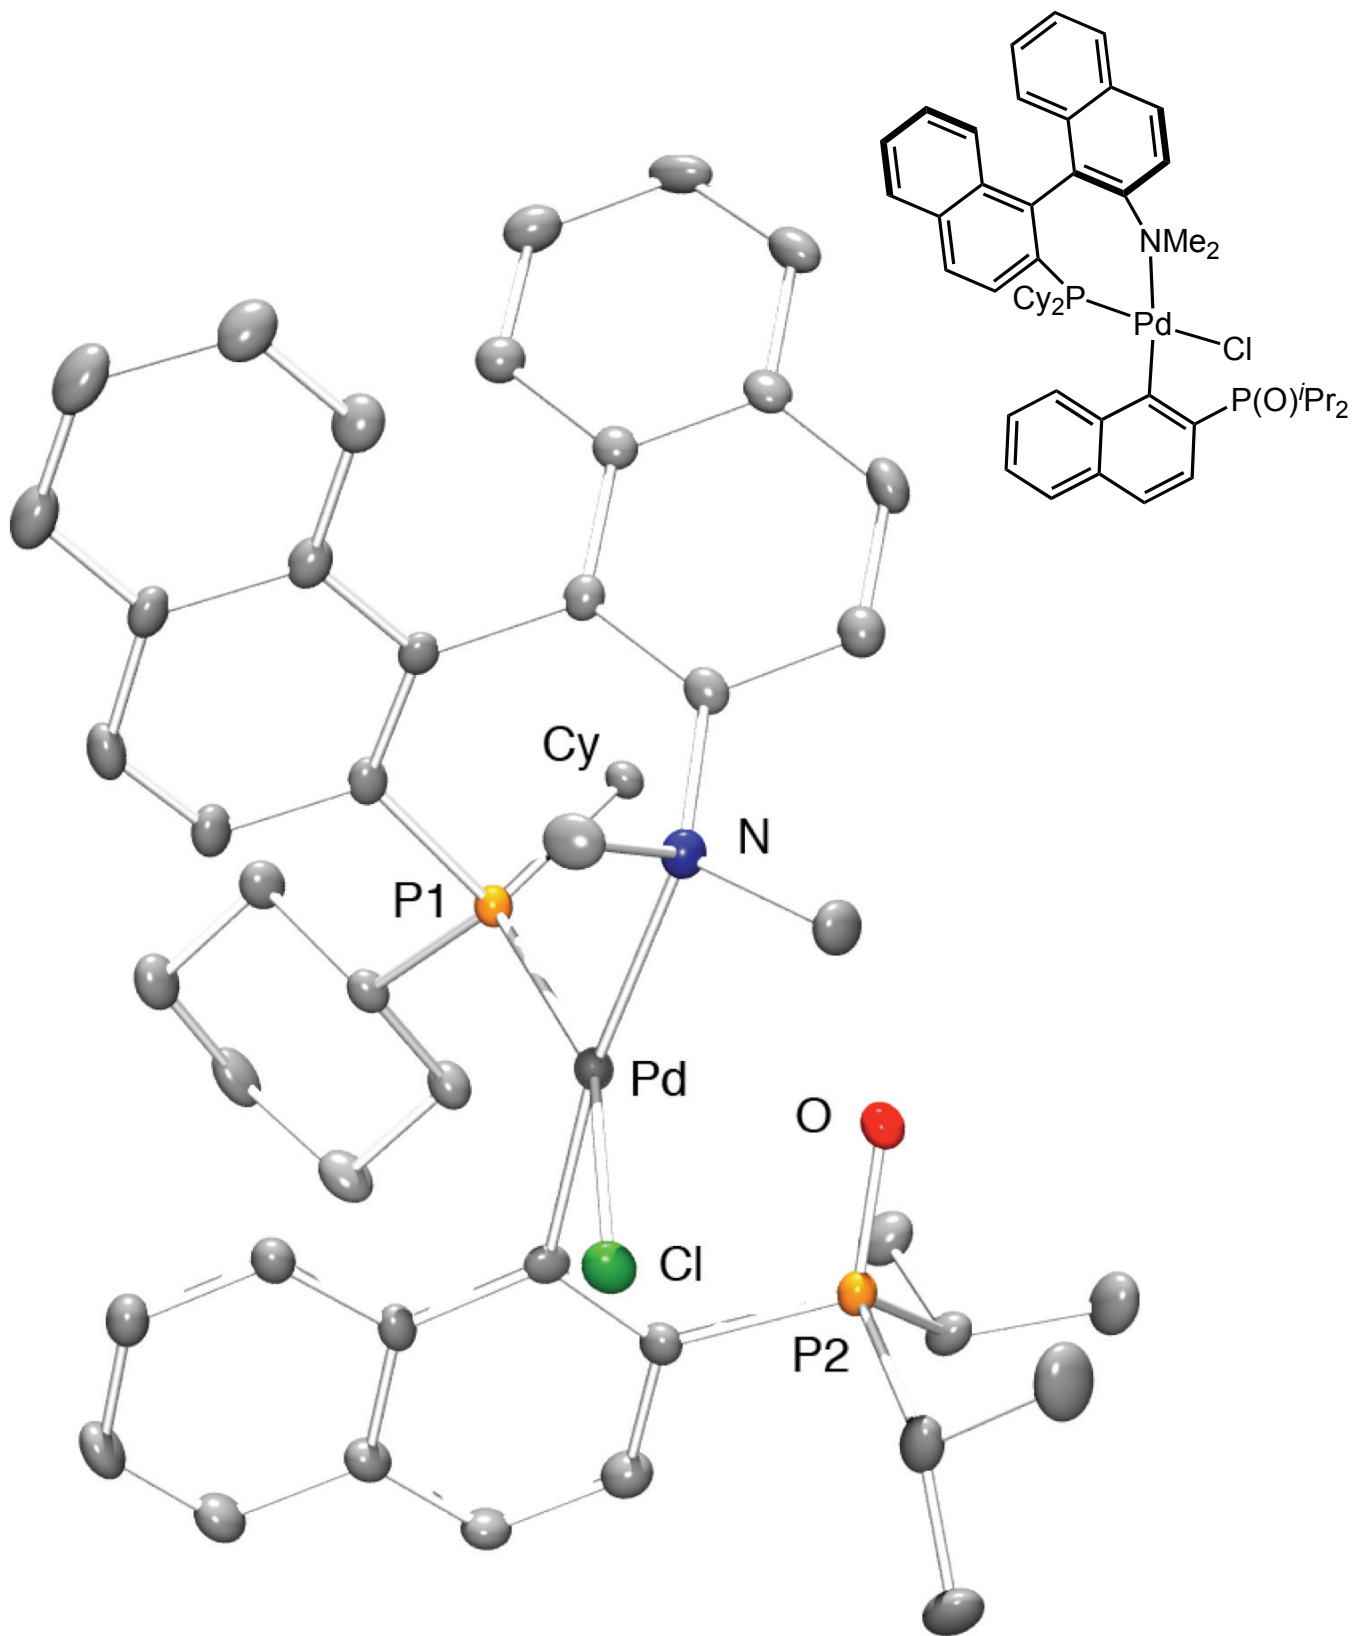

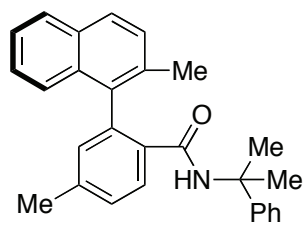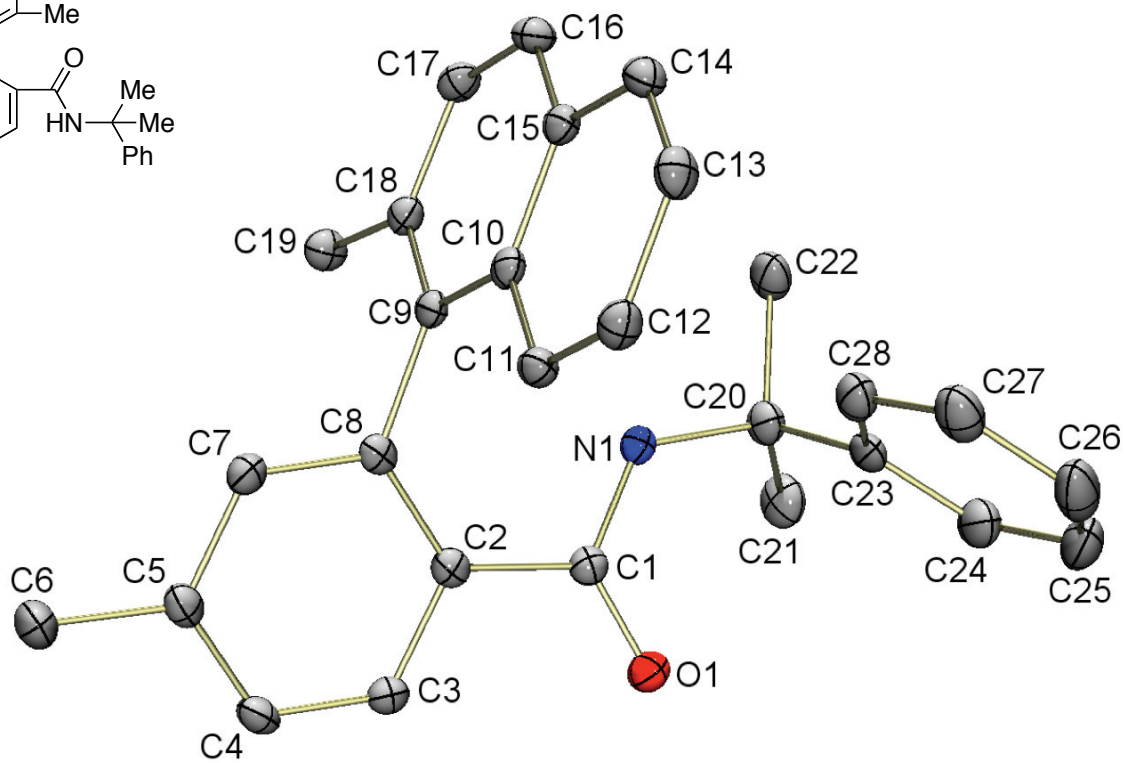

#### Part IV. Interconversion of intermediates formed after transmetalation.

Computational studies have revealed four low-energy intermediates formed after transmetalation of the (KenPhos)Pd(naphthylphosphonate)(bromide) complex with tolyl boronic acid (Figure S1). The energies of these intermediates are within 3 kcal/mol of the lowest energy complex. Significantly, the palladium atom in these intermediates have square-planar geometries. Here, the oxygen atom belonging to the phosphonate substituent is bound to palladium and the bound tolyl ligand is trans to the phosphonate oxygen. These functional groups share a plane with the naphthylphosphonate ligand which is, in turn, trans to the phosphine atom belonging to the KenPhos ligand.

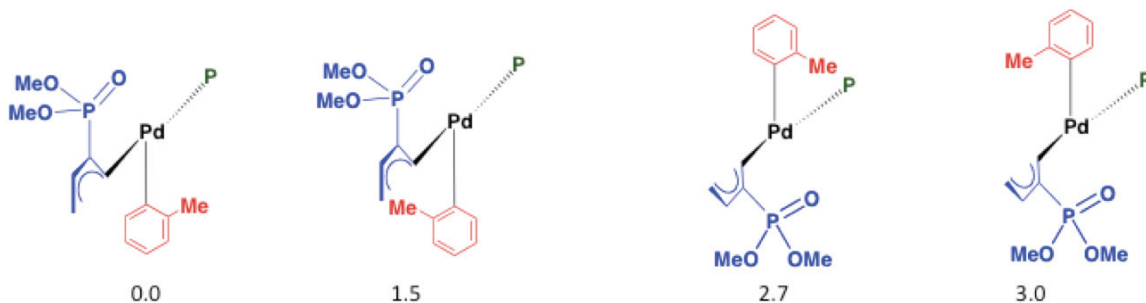

**Figure S1.** Square-planar complexes formed after transmetalation. The KenPhos ligand and some of the atoms belonging to the naphthylphosphonate ligand have been deleted for clarity. The energies below each structure are in kcal/mol.

Additional intermediates were also located that were at least 4 kcal/mol less stable than the lowest energy square-planar intermediate (Figure S2). Similar to the result that we found for the oxidative addition complex and the transition states, the geometry of these complexes are more accurately described as “T-shaped”.

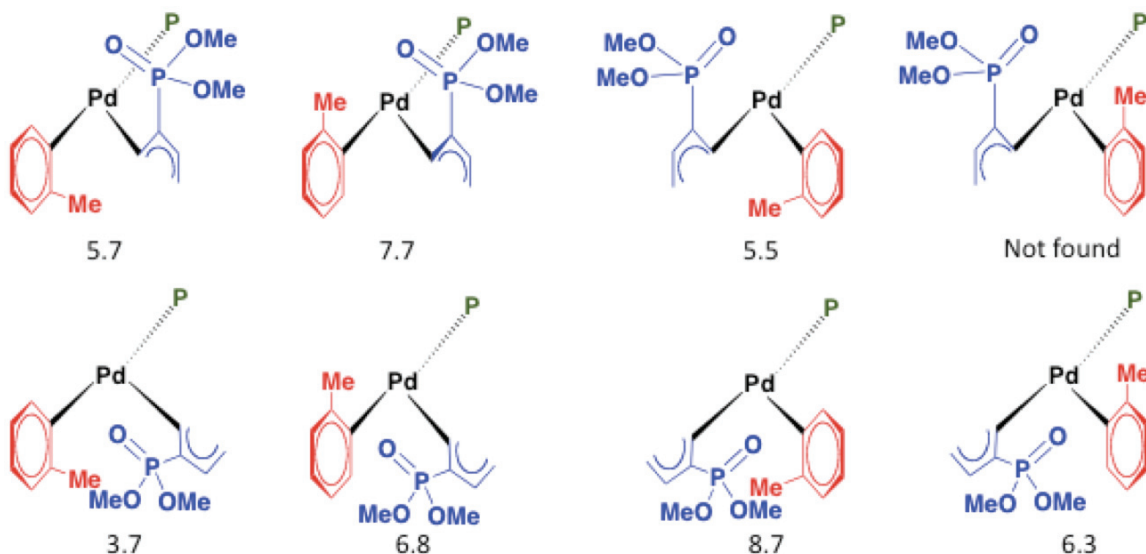

**Figure S2.** “T-shaped” complexes formed after transmetalation. The KenPhos ligand and some of the atoms belonging to the naphthylphosphonate ligand have been deleted for clarity. The energies below each structure are in kcal/mol.



Overall, these results suggest that transmetalation initially leads to the formation of the low-energy square-planar complexes. These square-planar complexes can be readily interconverted by rotation of the bound tolyl ligand around the Pd-C bond (Figure S3). In addition to this rotational motion, the tolyl group can also “oscillate” in either direction to form the “T-shaped” complexes which are the reactive intermediates that lead to the transition states discussed in the main article.

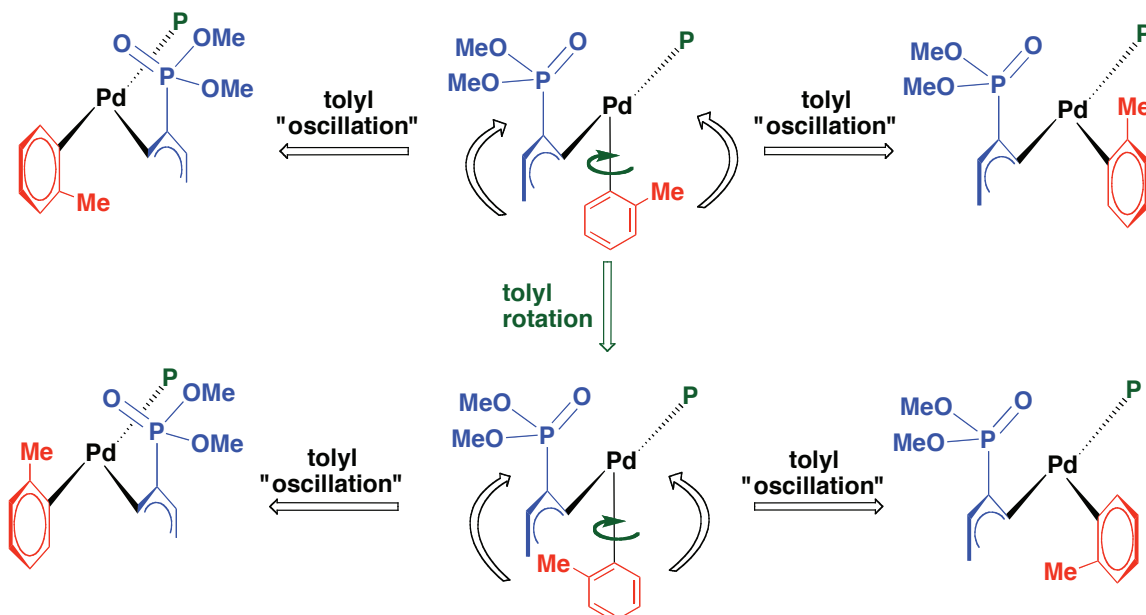

**Figure S3.** Interconversion of square-planar complexes to “T-shaped” reactive intermediates by rotation and “oscillation” of the bound tolyl addend. The KenPhos ligand and some of the atoms belonging to the naphthylphosphonate ligand have been deleted for clarity. The energies below each structure are in kcal/mol.

In an effort to obtain a barrier for rotation of the tolyl group, we have computed the free energy surface for the rotation of the tolyl addend around the Pd-C(tolyl) single bond for one of the low energy square-planar complexes by performing a relaxed potential scan of the dihedral angle defined by the C1-C2-Pd3-P4 as shown below in Figure S4. The free energy barrier was calculated to be 11.5 kcal/mol. In comparison, the activation free energy for reductive elimination of the coupled tolylnaphthylphosphonate product starting from this intermediate is 22.9 kcal/mol. Taken together, these results suggest that, as expected, rotation around the Pd-C single bond in these complexes is fast compared to reductive elimination.

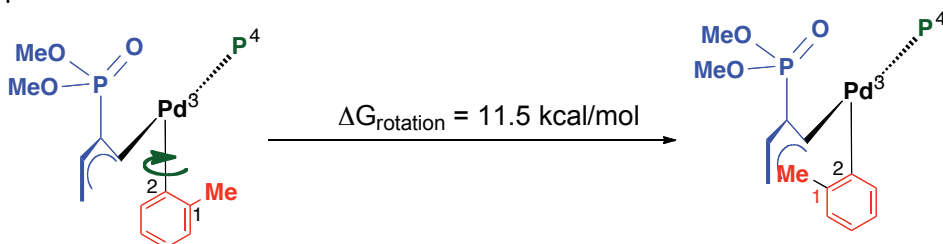

**Figure S4.** Interconversion of square-planar complexes by rotation of the tolyl addend around the Pd-C single bond. The free energy barrier for interconversion is given in kcal/mol.

## Part V. Cartesian coordinates and energies for stationary points.

### TS1

|    |           |           |           |
|----|-----------|-----------|-----------|
| Pd | 1.185037  | -0.041575 | -0.811888 |
| P  | -0.696661 | -0.662334 | 0.668689  |
| C  | 3.548995  | -1.756316 | -1.007506 |
| C  | 4.737648  | -2.430911 | -0.565311 |
| C  | 5.601107  | -1.788075 | 0.355350  |
| C  | 5.249825  | -0.572589 | 0.881064  |
| C  | 4.065479  | 0.097824  | 0.469811  |
| C  | 3.229196  | -0.414555 | -0.538808 |
| C  | 2.663026  | 1.004100  | -1.883008 |
| C  | 2.305274  | 2.293901  | -1.418462 |
| C  | 2.413318  | 3.431266  | -2.220554 |
| C  | 2.945248  | 3.318134  | -3.500828 |
| C  | 3.348514  | 2.064326  | -3.954273 |
| C  | 3.218818  | 0.891730  | -3.189004 |
| C  | -0.032103 | -0.928703 | 2.470184  |
| C  | 0.734318  | -2.260953 | 2.585241  |
| C  | -1.034762 | -0.758155 | 3.626694  |
| C  | -1.835981 | -2.156564 | 0.221286  |
| C  | -0.998275 | -3.284088 | -0.417695 |
| C  | -2.749161 | -2.708552 | 1.330392  |
| C  | -1.692338 | 0.959073  | 0.815893  |
| C  | -1.014596 | 1.934840  | 1.611388  |
| C  | -1.530856 | 3.186924  | 1.817988  |
| C  | -2.754561 | 3.574543  | 1.218877  |
| C  | -3.415073 | 2.644284  | 0.354066  |
| C  | -2.862105 | 1.321133  | 0.149067  |
| C  | -3.585764 | 0.424299  | -0.813998 |
| C  | -4.821781 | -0.182290 | -0.404883 |
| C  | -5.541284 | -1.034501 | -1.306772 |
| C  | -5.003307 | -1.256624 | -2.597738 |
| C  | -3.826598 | -0.663571 | -2.982501 |
| C  | -3.092844 | 0.192790  | -2.108279 |
| N  | -1.855470 | 0.743846  | -2.541050 |
| C  | -1.798794 | 2.197779  | -2.726770 |
| C  | -1.173664 | 0.057497  | -3.633475 |
| H  | 0.042306  | -3.105979 | 2.478326  |
| H  | 1.469875  | -2.345137 | 1.776670  |
| H  | -1.543550 | 0.208633  | 3.552545  |
| H  | -1.811033 | -1.529368 | 3.573388  |
| H  | -0.298795 | -3.704676 | 0.316477  |
| H  | -0.383046 | -2.877246 | -1.227413 |
| H  | -2.475437 | -1.749501 | -0.564578 |
| H  | -0.040636 | 1.707267  | 2.027766  |
| H  | -0.989137 | 3.902025  | 2.432468  |
| H  | -3.454652 | -0.836767 | -3.985648 |

|   |           |           |           |
|---|-----------|-----------|-----------|
| H | -5.543421 | -1.895907 | -3.292541 |
| H | -2.141066 | -3.109477 | 2.150697  |
| H | -3.371491 | -1.910936 | 1.749001  |
| H | -2.305588 | 2.508398  | -3.658009 |
| H | -0.750963 | 2.509496  | -2.781822 |
| H | -2.266149 | 2.715927  | -1.892163 |
| H | -1.148923 | -1.019862 | -3.448080 |
| H | -0.141621 | 0.419174  | -3.673232 |
| H | -1.631899 | 0.236957  | -4.623637 |
| H | 0.716933  | -0.131511 | 2.544518  |
| H | 2.094948  | 4.394913  | -1.830324 |
| H | 3.780660  | 1.977974  | -4.948970 |
| H | 3.060047  | 4.191269  | -4.138121 |
| C | -1.906724 | -4.405172 | -0.951333 |
| H | -2.522666 | -4.008340 | -1.771797 |
| H | -1.290951 | -5.207459 | -1.378589 |
| C | -3.648589 | -3.838371 | 0.793802  |
| H | -4.261446 | -4.236777 | 1.612836  |
| H | -4.346724 | -3.423610 | 0.054790  |
| C | -2.825940 | -4.960771 | 0.145843  |
| H | -3.490541 | -5.730872 | -0.266747 |
| H | -2.212874 | -5.455396 | 0.914346  |
| C | 1.436260  | -2.371876 | 3.950596  |
| H | 2.218067  | -1.601745 | 4.014695  |
| H | 1.945189  | -3.341451 | 4.026732  |
| C | -0.317777 | -0.866312 | 4.985532  |
| H | -1.048853 | -0.767566 | 5.798551  |
| H | 0.383753  | -0.025647 | 5.091954  |
| C | 0.451722  | -2.189020 | 5.114773  |
| H | 0.983831  | -2.230360 | 6.074087  |
| H | -0.263997 | -3.024769 | 5.118048  |
| C | -5.367724 | 0.005256  | 0.900109  |
| C | -6.759815 | -1.636516 | -0.890929 |
| C | -4.605208 | 3.084060  | -0.295954 |
| C | -3.308919 | 4.865289  | 1.426461  |
| C | -6.548160 | -0.596924 | 1.275774  |
| H | -6.939528 | -0.432885 | 2.276328  |
| C | -7.259432 | -1.424048 | 0.373048  |
| H | -8.192322 | -1.887918 | 0.681227  |
| H | -4.839124 | 0.636637  | 1.605232  |
| H | -7.289822 | -2.273013 | -1.596055 |
| H | -2.788993 | 5.550322  | 2.092225  |
| H | -5.116713 | 2.411932  | -0.974624 |
| C | -4.470681 | 5.247388  | 0.795441  |
| H | -4.886317 | 6.237787  | 0.960274  |
| C | -5.117927 | 4.345314  | -0.080166 |
| H | -6.028920 | 4.648399  | -0.589411 |
| H | 6.517563  | -2.283114 | 0.665543  |
| C | 3.713407  | -0.379675 | -3.841732 |

|   |          |           |           |
|---|----------|-----------|-----------|
| H | 4.119921 | -0.152799 | -4.832440 |
| H | 4.505112 | -0.859335 | -3.258391 |
| H | 2.923511 | -1.124368 | -3.972173 |
| H | 1.917876 | 2.416311  | -0.412512 |
| H | 5.877621 | -0.103294 | 1.630139  |
| C | 2.672733 | -2.489111 | -1.858028 |
| C | 5.012632 | -3.749625 | -1.022118 |
| P | 3.733514 | 1.630836  | 1.426321  |
| O | 2.286875 | 1.981747  | 1.794929  |
| O | 4.608470 | 2.804556  | 0.632593  |
| O | 4.703893 | 1.518027  | 2.806989  |
| H | 1.756197 | -2.001269 | -2.179866 |
| H | 5.925742 | -4.232107 | -0.681012 |
| C | 4.138978 | -4.414577 | -1.850463 |
| H | 4.358131 | -5.426564 | -2.180959 |
| C | 2.945966 | -3.777444 | -2.262783 |
| H | 2.244983 | -4.303234 | -2.905554 |
| C | 4.128464 | 0.944232  | 3.985930  |
| H | 3.126886 | 1.344458  | 4.169693  |
| H | 4.078227 | -0.148704 | 3.901752  |
| H | 4.792404 | 1.211016  | 4.811647  |
| C | 4.571390 | 4.139580  | 1.161890  |
| H | 5.080037 | 4.183694  | 2.130487  |
| H | 5.098329 | 4.762019  | 0.436486  |
| H | 3.539501 | 4.489696  | 1.269938  |

Sum of electronic and thermal Free Energies= -2474.357446

## TS2

|    |           |           |           |
|----|-----------|-----------|-----------|
| Pd | 1.260673  | -0.081611 | -0.814574 |
| P  | -0.602683 | -0.692958 | 0.743201  |
| C  | 4.019703  | -1.326364 | 0.091189  |
| C  | 5.039175  | -1.289691 | 1.104229  |
| C  | 5.244713  | -0.106931 | 1.861636  |
| C  | 4.452877  | 0.988484  | 1.643847  |
| C  | 3.457217  | 0.976829  | 0.631006  |
| C  | 3.220805  | -0.144381 | -0.194436 |
| C  | 3.006132  | 0.207127  | -2.098956 |
| C  | 3.764173  | 1.378522  | -2.321835 |
| C  | 4.298420  | 1.715724  | -3.560462 |
| C  | 4.109312  | 0.865607  | -4.649024 |
| C  | 3.371361  | -0.296493 | -4.462901 |
| C  | 2.809639  | -0.651070 | -3.222949 |
| C  | 0.179040  | -0.984527 | 2.497815  |
| C  | 1.127677  | -2.199377 | 2.480642  |
| C  | -0.736112 | -1.051389 | 3.736649  |
| C  | -1.661434 | -2.248300 | 0.296559  |
| C  | -0.802354 | -3.341712 | -0.367683 |
| C  | -2.525710 | -2.842132 | 1.421044  |

|   |           |           |           |
|---|-----------|-----------|-----------|
| C | -1.798665 | 0.771906  | 1.017588  |
| C | -1.407506 | 1.668052  | 2.057837  |
| C | -2.140423 | 2.779401  | 2.383059  |
| C | -3.313898 | 3.107173  | 1.662031  |
| C | -3.687056 | 2.275687  | 0.558850  |
| C | -2.908285 | 1.097982  | 0.234119  |
| C | -3.352634 | 0.298365  | -0.958557 |
| C | -4.533147 | -0.513413 | -0.826738 |
| C | -4.998141 | -1.304224 | -1.928394 |
| C | -4.269015 | -1.255453 | -3.141004 |
| C | -3.158692 | -0.461488 | -3.266552 |
| C | -2.669916 | 0.345743  | -2.190393 |
| N | -1.499163 | 1.109807  | -2.388672 |
| C | -1.519536 | 2.556761  | -2.129914 |
| C | -0.696944 | 0.829358  | -3.574272 |
| H | 0.541496  | -3.126563 | 2.421360  |
| H | 1.776083  | -2.169057 | 1.599711  |
| H | -1.442069 | -0.215843 | 3.761098  |
| H | -1.337703 | -1.966083 | 3.710506  |
| H | -0.076017 | -3.747406 | 0.348792  |
| H | -0.222669 | -2.909978 | -1.189977 |
| H | -2.332173 | -1.860432 | -0.473622 |
| H | -0.491472 | 1.481951  | 2.602568  |
| H | -1.819735 | 3.426985  | 3.195835  |
| H | -2.654311 | -0.425237 | -4.223895 |
| H | -4.614104 | -1.842505 | -3.989291 |
| H | -1.878169 | -3.247061 | 2.208540  |
| H | -3.147042 | -2.065797 | 1.880400  |
| H | -1.868838 | 3.104368  | -3.022774 |
| H | -0.511494 | 2.887080  | -1.868564 |
| H | -2.180424 | 2.800602  | -1.304723 |
| H | -0.522643 | -0.243579 | -3.678596 |
| H | 0.272533  | 1.318932  | -3.452757 |
| H | -1.154491 | 1.208372  | -4.506635 |
| H | 0.821153  | -0.098962 | 2.594327  |
| H | 4.880652  | 2.628012  | -3.662697 |
| H | 3.198152  | -0.958750 | -5.309800 |
| H | 4.532772  | 1.099368  | -5.622261 |
| C | -1.688838 | -4.484399 | -0.895238 |
| H | -2.326728 | -4.097355 | -1.703152 |
| H | -1.058160 | -5.266102 | -1.338794 |
| C | -3.413779 | -3.981968 | 0.888687  |
| H | -3.998147 | -4.407235 | 1.715239  |
| H | -4.137835 | -3.574141 | 0.171392  |
| C | -2.576502 | -5.075205 | 0.209920  |
| H | -3.229737 | -5.854744 | -0.202967 |
| H | -1.939526 | -5.566197 | 0.961274  |
| C | 1.982817  | -2.228948 | 3.760281  |
| H | 2.645348  | -1.351947 | 3.763598  |

|   |           |           |           |
|---|-----------|-----------|-----------|
| H | 2.635462  | -3.111171 | 3.746489  |
| C | 0.115951  | -1.058341 | 5.020537  |
| H | -0.539830 | -1.111747 | 5.899546  |
| H | 0.665327  | -0.108184 | 5.095838  |
| C | 1.114668  | -2.226051 | 5.027237  |
| H | 1.747252  | -2.181598 | 5.923318  |
| H | 0.557071  | -3.173046 | 5.085273  |
| C | -5.271061 | -0.597797 | 0.392476  |
| C | -6.159820 | -2.109132 | -1.787610 |
| C | -4.826295 | 2.670353  | -0.202061 |
| C | -4.092648 | 4.249470  | 1.986458  |
| C | -6.394344 | -1.388541 | 0.500099  |
| H | -6.934589 | -1.425350 | 1.442511  |
| C | -6.853029 | -2.152377 | -0.599607 |
| H | -7.742459 | -2.768582 | -0.501703 |
| H | -4.940361 | -0.024149 | 1.250485  |
| H | -6.491132 | -2.692861 | -2.643722 |
| H | -3.790298 | 4.859102  | 2.834948  |
| H | -5.121096 | 2.077793  | -1.059829 |
| C | -5.198894 | 4.586053  | 1.240752  |
| H | -5.788043 | 5.462972  | 1.495085  |
| C | -5.559882 | 3.788900  | 0.129898  |
| H | -6.424666 | 4.060448  | -0.469604 |
| H | 6.021478  | -0.088981 | 2.621405  |
| C | 3.832475  | -2.557387 | -0.588494 |
| P | 2.497248  | 2.540437  | 0.552091  |
| C | 4.599103  | -3.672054 | -0.317089 |
| H | 4.417548  | -4.595970 | -0.859897 |
| H | 3.049747  | -2.627175 | -1.324647 |
| H | 4.582521  | 1.880159  | 2.248131  |
| C | 5.615022  | -3.617673 | 0.661147  |
| H | 6.222407  | -4.494912 | 0.867930  |
| C | 5.823187  | -2.447417 | 1.354861  |
| H | 6.593131  | -2.389999 | 2.120945  |
| O | 1.386509  | 2.809259  | -0.464939 |
| O | 2.017824  | 2.671103  | 2.164289  |
| O | 3.707115  | 3.724576  | 0.471335  |
| C | 1.468536  | 3.929692  | 2.580999  |
| H | 2.230320  | 4.716158  | 2.537934  |
| H | 0.606864  | 4.205188  | 1.964434  |
| H | 1.149596  | 3.794011  | 3.617009  |
| C | 3.478989  | 4.869494  | -0.363013 |
| H | 3.174195  | 4.574643  | -1.371394 |
| H | 2.709902  | 5.526502  | 0.058671  |
| H | 4.432132  | 5.402179  | -0.400032 |
| C | 1.958482  | -1.910877 | -3.255430 |
| H | 1.200366  | -1.832388 | -4.044373 |
| H | 2.564688  | -2.796749 | -3.488033 |
| H | 1.427481  | -2.080984 | -2.316404 |

H 4.003921 2.028367 -1.491190

Sum of electronic and thermal Free Energies= -2474.352212

**TS3**

Pd 1.226054 -0.044338 -0.837017  
P -0.665686 -0.620327 0.653767  
C 3.545155 -1.761073 -1.115188  
C 4.680340 -2.494221 -0.635822  
C 5.542277 -1.898650 0.318307  
C 5.228978 -0.673992 0.843695  
C 4.087528 0.056295 0.412218  
C 3.263420 -0.403091 -0.639622  
C 2.807524 0.833778 -2.031714  
C 2.504172 2.231466 -2.004341  
C 2.865845 3.025065 -3.107485  
C 3.496798 2.512918 -4.234442  
C 3.770317 1.147735 -4.281079  
C 3.431314 0.338974 -3.201125  
C 0.007870 -0.839405 2.459374  
C 0.813687 -2.145899 2.598504  
C -0.998124 -0.678535 3.614292  
C -1.761796 -2.153489 0.232229  
C -0.889057 -3.269836 -0.378805  
C -2.658424 -2.708372 1.353056  
C -1.702879 0.976651 0.775907  
C -1.043302 1.981401 1.551565  
C -1.581186 3.228353 1.732634  
C -2.810932 3.582294 1.125437  
C -3.460682 2.618963 0.289229  
C -2.887462 1.300046 0.114085  
C -3.623837 0.360269 -0.797988  
C -4.836770 -0.251141 -0.329426  
C -5.572896 -1.139296 -1.181931  
C -5.076105 -1.391990 -2.483908  
C -3.922601 -0.793207 -2.925575  
C -3.174340 0.098161 -2.100744  
N -1.963245 0.660862 -2.591904  
C -1.965857 2.101010 -2.858939  
C -1.286149 -0.065558 -3.661011  
C 1.699192 2.953851 -0.940355  
H 0.149142 -3.016019 2.519277  
H 1.546552 -2.225929 1.787099  
H -1.541044 0.267954 3.521191  
H -1.747217 -1.477571 3.583972  
H -0.183040 -3.654081 0.368682  
H -0.279783 -2.864132 -1.193434  
H -2.411247 -1.783111 -0.563647  
H -0.071137 1.774247 1.983826

|   |           |           |           |
|---|-----------|-----------|-----------|
| H | -1.054553 | 3.964597  | 2.335238  |
| H | -3.580476 | -0.989339 | -3.935327 |
| H | -5.629834 | -2.059296 | -3.140547 |
| H | -2.036605 | -3.072839 | 2.179898  |
| H | -3.303064 | -1.920962 | 1.756739  |
| H | -2.528862 | 2.348140  | -3.777171 |
| H | -0.932700 | 2.438519  | -2.990815 |
| H | -2.403434 | 2.651347  | -2.028050 |
| H | -1.243299 | -1.132171 | -3.424989 |
| H | -0.258937 | 0.305551  | -3.732494 |
| H | -1.760272 | 0.059587  | -4.652046 |
| H | 0.736764  | -0.023308 | 2.520697  |
| H | 3.696722  | -0.706486 | -3.266394 |
| H | 2.618653  | 4.084551  | -3.071083 |
| H | 4.261831  | 0.706931  | -5.144738 |
| H | 3.767677  | 3.167078  | -5.059182 |
| H | 1.624791  | 2.417190  | 0.003661  |
| H | 2.131291  | 3.942238  | -0.743205 |
| H | 0.673663  | 3.118604  | -1.294149 |
| C | -1.762873 | -4.427997 | -0.890279 |
| H | -2.388633 | -4.067255 | -1.720164 |
| H | -1.122837 | -5.220619 | -1.299406 |
| C | -3.523628 | -3.875613 | 0.841085  |
| H | -4.125251 | -4.274329 | 1.668252  |
| H | -4.233105 | -3.497475 | 0.093155  |
| C | -2.667952 | -4.986835 | 0.217081  |
| H | -3.309599 | -5.784041 | -0.180192 |
| H | -2.042405 | -5.447795 | 0.996448  |
| C | 1.529291  | -2.197261 | 3.960559  |
| H | 2.282498  | -1.397760 | 3.997569  |
| H | 2.072311  | -3.146414 | 4.057537  |
| C | -0.270438 | -0.728516 | 4.971143  |
| H | -1.000301 | -0.637064 | 5.786243  |
| H | 0.401075  | 0.138711  | 5.052038  |
| C | 0.546492  | -2.019718 | 5.127093  |
| H | 1.085937  | -2.017898 | 6.083291  |
| H | -0.139010 | -2.879984 | 5.156778  |
| C | -5.343348 | -0.030858 | 0.986147  |
| C | -6.768520 | -1.744778 | -0.708582 |
| C | -4.664796 | 3.020856  | -0.360062 |
| C | -3.385019 | 4.868842  | 1.303252  |
| C | -6.502536 | -0.636911 | 1.417811  |
| H | -6.864035 | -0.447514 | 2.425079  |
| C | -7.230412 | -1.500405 | 0.563875  |
| H | -8.146210 | -1.967139 | 0.915873  |
| H | -4.801949 | 0.628844  | 1.654667  |
| H | -7.311958 | -2.409276 | -1.376656 |
| H | -2.872258 | 5.579293  | 1.947599  |
| H | -5.171681 | 2.321900  | -1.014741 |



|   |           |           |           |
|---|-----------|-----------|-----------|
| C | -4.557494 | 5.215023  | 0.671405  |
| H | -4.988420 | 6.202419  | 0.813287  |
| C | -5.196706 | 4.278853  | -0.173822 |
| H | -6.117319 | 4.552656  | -0.682344 |
| H | 6.428027  | -2.434476 | 0.648690  |
| C | 2.693474  | -2.432461 | -2.041088 |
| P | 3.761932  | 1.544732  | 1.434617  |
| C | 2.936067  | -3.722597 | -2.464156 |
| H | 2.254696  | -4.197039 | -3.165229 |
| H | 1.821669  | -1.902568 | -2.413511 |
| H | 5.860231  | -0.236731 | 1.608260  |
| C | 4.067194  | -4.425771 | -1.992927 |
| H | 4.259632  | -5.440188 | -2.332392 |
| C | 4.917509  | -3.817639 | -1.099466 |
| H | 5.788008  | -4.346439 | -0.718088 |
| O | 2.347562  | 1.760827  | 1.988318  |
| O | 4.889841  | 1.491415  | 2.693749  |
| O | 4.427345  | 2.808961  | 0.575703  |
| C | 4.469586  | 0.937334  | 3.947257  |
| H | 5.218855  | 1.243406  | 4.681150  |
| H | 3.485564  | 1.317744  | 4.235280  |
| H | 4.437787  | -0.158401 | 3.897300  |
| C | 4.431623  | 4.106022  | 1.195580  |
| H | 5.081975  | 4.107702  | 2.075777  |
| H | 4.822061  | 4.794146  | 0.443485  |
| H | 3.418404  | 4.405857  | 1.482500  |

Sum of electronic and thermal Free Energies= -2474.354612

#### TS4

|    |           |           |           |
|----|-----------|-----------|-----------|
| Pd | 1.149448  | -0.156696 | -0.805209 |
| P  | -0.611019 | -0.568626 | 0.900296  |
| C  | 3.911517  | -1.436667 | -0.047526 |
| C  | 5.219945  | -1.376233 | 0.536977  |
| C  | 5.747142  | -0.122728 | 0.952507  |
| C  | 4.950406  | 0.988865  | 0.904442  |
| C  | 3.678211  | 0.950428  | 0.268227  |
| C  | 3.180971  | -0.210074 | -0.371484 |
| C  | 2.720519  | -0.157362 | -2.242957 |
| C  | 3.180101  | 0.930141  | -3.047910 |
| C  | 3.427750  | 0.705828  | -4.413526 |
| C  | 3.225416  | -0.525694 | -5.029708 |
| C  | 2.777395  | -1.592813 | -4.256254 |
| C  | 2.555982  | -1.406688 | -2.893735 |
| C  | 0.120712  | -0.648686 | 2.693205  |
| C  | 1.076837  | -1.847657 | 2.848267  |
| C  | -0.850022 | -0.585496 | 3.889910  |
| C  | -1.634241 | -2.178544 | 0.584817  |
| C  | -0.733660 | -3.288905 | 0.007815  |

|   |           |           |           |
|---|-----------|-----------|-----------|
| C | -2.490620 | -2.714307 | 1.744459  |
| C | -1.800227 | 0.919530  | 0.954256  |
| C | -1.435277 | 1.943068  | 1.879563  |
| C | -2.143225 | 3.109277  | 2.001186  |
| C | -3.265243 | 3.362000  | 1.175406  |
| C | -3.619366 | 2.384533  | 0.192093  |
| C | -2.865080 | 1.152507  | 0.083358  |
| C | -3.297534 | 0.184784  | -0.982100 |
| C | -4.500072 | -0.568522 | -0.735935 |
| C | -4.982956 | -1.508046 | -1.703930 |
| C | -4.246211 | -1.667207 | -2.900982 |
| C | -3.108494 | -0.938600 | -3.133744 |
| C | -2.597214 | 0.010836  | -2.192283 |
| N | -1.386162 | 0.686714  | -2.499138 |
| C | -1.363598 | 2.156674  | -2.424483 |
| C | -0.673368 | 0.252450  | -3.702927 |
| C | 3.424053  | 2.332569  | -2.555410 |
| H | 0.504117  | -2.785132 | 2.847831  |
| H | 1.774556  | -1.894015 | 2.006726  |
| H | -1.551496 | 0.249286  | 3.795385  |
| H | -1.455616 | -1.497088 | 3.928823  |
| H | -0.004589 | -3.616664 | 0.760665  |
| H | -0.158087 | -2.892112 | -0.836890 |
| H | -2.311066 | -1.875169 | -0.216333 |
| H | -0.560316 | 1.807929  | 2.500223  |
| H | -1.840992 | 3.859717  | 2.728205  |
| H | -2.598036 | -1.077290 | -4.077007 |
| H | -4.602069 | -2.368146 | -3.652755 |
| H | -1.840261 | -3.034927 | 2.568058  |
| H | -3.146180 | -1.928637 | 2.135797  |
| H | -1.854599 | 2.603532  | -3.305916 |
| H | -0.324632 | 2.490039  | -2.381932 |
| H | -1.857873 | 2.518303  | -1.530082 |
| H | -0.495384 | -0.824321 | -3.687381 |
| H | 0.300395  | 0.744674  | -3.718136 |
| H | -1.205740 | 0.517627  | -4.633707 |
| H | 0.755462  | 0.246570  | 2.711202  |
| H | 2.246469  | -2.269983 | -2.325937 |
| H | 3.786049  | 1.542257  | -5.009646 |
| H | 2.612457  | -2.572363 | -4.698405 |
| H | 3.427150  | -0.647932 | -6.090709 |
| H | 4.192195  | 2.355908  | -1.773567 |
| H | 3.771415  | 2.966263  | -3.377787 |
| H | 2.517584  | 2.776764  | -2.137480 |
| C | -1.576922 | -4.494270 | -0.443245 |
| H | -2.218880 | -4.185909 | -1.281268 |
| H | -0.918537 | -5.285700 | -0.825109 |
| C | -3.333755 | -3.920337 | 1.288627  |
| H | -3.913250 | -4.304511 | 2.138324  |

|   |           |           |           |
|---|-----------|-----------|-----------|
| H | -4.062433 | -3.588686 | 0.537117  |
| C | -2.455373 | -5.031737 | 0.696087  |
| H | -3.080312 | -5.859532 | 0.336715  |
| H | -1.810517 | -5.446671 | 1.485641  |
| C | 1.864388  | -1.740856 | 4.166959  |
| H | 2.519163  | -0.859407 | 4.116202  |
| H | 2.521026  | -2.613464 | 4.275327  |
| C | -0.061412 | -0.460649 | 5.207684  |
| H | -0.759178 | -0.425341 | 6.054638  |
| H | 0.486935  | 0.493442  | 5.213377  |
| C | 0.932333  | -1.618346 | 5.381509  |
| H | 1.518066  | -1.483349 | 6.300039  |
| H | 0.371058  | -2.556972 | 5.504096  |
| C | -5.243619 | -0.444441 | 0.476402  |
| C | -6.166580 | -2.251298 | -1.449883 |
| C | -4.709782 | 2.689259  | -0.673372 |
| C | -4.014452 | 4.563444  | 1.283076  |
| C | -6.386631 | -1.181360 | 0.697912  |
| H | -6.929489 | -1.058815 | 1.631505  |
| C | -6.863001 | -2.093564 | -0.273809 |
| H | -7.768115 | -2.664850 | -0.087367 |
| H | -4.901099 | 0.245945  | 1.237962  |
| H | -6.510483 | -2.951181 | -2.208343 |
| H | -3.727489 | 5.286622  | 2.043044  |
| H | -4.985992 | 1.979215  | -1.443580 |
| C | -5.073180 | 4.814315  | 0.440840  |
| H | -5.639760 | 5.737302  | 0.529374  |
| C | -5.415691 | 3.866600  | -0.551438 |
| H | -6.243571 | 4.068376  | -1.225901 |
| H | 6.745532  | -0.076323 | 1.378979  |
| C | 3.344289  | -2.726008 | -0.221246 |
| P | 2.664667  | 2.438952  | 0.596171  |
| C | 4.047601  | -3.882298 | 0.056875  |
| H | 3.569155  | -4.849552 | -0.072625 |
| H | 2.303698  | -2.793347 | -0.514708 |
| H | 5.295184  | 1.926571  | 1.328148  |
| C | 5.376152  | -3.809874 | 0.524847  |
| H | 5.935969  | -4.719912 | 0.724051  |
| C | 5.939905  | -2.577361 | 0.771522  |
| H | 6.941495  | -2.503728 | 1.189302  |
| O | 1.378687  | 2.782672  | -0.163420 |
| O | 2.434078  | 2.269783  | 2.261452  |
| O | 3.783894  | 3.708049  | 0.553617  |
| C | 1.972831  | 3.424743  | 2.975213  |
| H | 2.744139  | 4.202786  | 2.990920  |
| H | 1.052996  | 3.823854  | 2.532844  |
| H | 1.773683  | 3.093015  | 3.996934  |
| C | 3.390364  | 4.982640  | 0.026497  |
| H | 2.421842  | 4.920308  | -0.477442 |

H 3.331813 5.709927 0.844491  
H 4.158921 5.299707 -0.684432

Sum of electronic and thermal Free Energies= -2474.351207

### TS5

Pd 1.110062 0.378062 -0.694421  
P -0.690437 -0.309807 0.858299  
P 4.182464 -1.819020 -0.456801  
C 4.057317 -0.134905 0.272252  
C 5.100510 0.140209 1.198079  
C 5.128748 1.303730 1.920869  
C 4.058555 2.224869 1.807201  
C 3.006231 1.971993 0.862429  
C 3.036787 0.796427 -0.001679  
C 2.672815 1.000778 -1.978382  
C 3.017625 2.251790 -2.568514  
C 3.350901 2.270873 -3.934086  
C 3.345603 1.131572 -4.735739  
C 3.016408 -0.091186 -4.160639  
C 2.711400 -0.151405 -2.799905  
C -0.064026 -0.164033 2.686922  
C 1.018783 -1.215525 2.996724  
C -1.108816 -0.117142 3.818065  
C -1.428009 -2.073445 0.607050  
C -0.309403 -3.067767 0.231817  
C -2.306833 -2.636710 1.736598  
C -2.052006 1.023955 0.755022  
C -1.769563 2.190008 1.532048  
C -2.581352 3.293552 1.525061  
C -3.742007 3.329505 0.714298  
C -4.026716 2.198482 -0.115194  
C -3.160377 1.037269 -0.092574  
C -3.536682 -0.102576 -0.995729  
C -4.644051 -0.931461 -0.601244  
C -5.061290 -2.025153 -1.428674  
C -4.356457 -2.260676 -2.633039  
C -3.307391 -1.459365 -3.005558  
C -2.869635 -0.358713 -2.206336  
N -1.744636 0.398939 -2.632177  
C -1.943175 1.829337 -2.890308  
C -0.909887 -0.192150 -3.676525  
O 2.912743 -2.579096 -0.848823  
O 5.107232 -2.705224 0.647956  
O 5.343580 -1.639261 -1.639756  
C 4.403986 -3.448751 1.651033  
C 5.699509 -2.802989 -2.403035  
C 3.087167 3.585191 -1.858559  
H 5.882533 -0.598678 1.333569

|   |           |           |           |
|---|-----------|-----------|-----------|
| H | 0.565257  | -2.213499 | 3.057463  |
| H | 1.758955  | -1.244864 | 2.190024  |
| H | -1.887790 | 0.622916  | 3.607695  |
| H | -1.612937 | -1.086142 | 3.902869  |
| H | 0.359425  | -3.225842 | 1.086896  |
| H | 0.321096  | -2.666378 | -0.566942 |
| H | -2.055370 | -1.948101 | -0.278854 |
| H | -0.876098 | 2.218268  | 2.142853  |
| H | -2.337122 | 4.155734  | 2.141517  |
| H | -2.811237 | -1.660047 | -3.946608 |
| H | -4.665666 | -3.082234 | -3.275184 |
| H | -1.698340 | -2.781969 | 2.638410  |
| H | -3.109222 | -1.937222 | 1.995450  |
| H | -2.476882 | 2.000508  | -3.841627 |
| H | -0.963673 | 2.313331  | -2.952115 |
| H | -2.505743 | 2.301638  | -2.089368 |
| H | -0.658654 | -1.225740 | -3.426912 |
| H | 0.023711  | 0.371849  | -3.732799 |
| H | -1.381895 | -0.169598 | -4.675491 |
| H | 4.013834  | -2.781439 | 2.430402  |
| H | 5.134672  | -4.129840 | 2.093731  |
| H | 3.579776  | -4.018693 | 1.212079  |
| H | 4.813425  | -3.259380 | -2.856261 |
| H | 6.210106  | -3.537416 | -1.771340 |
| H | 6.375722  | -2.452064 | -3.184856 |
| H | 0.457423  | 0.801462  | 2.663541  |
| H | 2.481876  | -1.121598 | -2.373508 |
| H | 3.622380  | 3.225936  | -4.378663 |
| H | 3.004788  | -1.002698 | -4.753663 |
| H | 3.607511  | 1.203609  | -5.788334 |
| H | 2.122196  | 3.898780  | -1.450703 |
| H | 3.793862  | 3.569515  | -1.023651 |
| H | 3.415585  | 4.359929  | -2.558697 |
| C | -0.917715 | -4.418403 | -0.182898 |
| H | -1.508356 | -4.280175 | -1.100787 |
| H | -0.112983 | -5.122323 | -0.429877 |
| C | -2.909193 | -3.995220 | 1.329233  |
| H | -3.504437 | -4.396622 | 2.159912  |
| H | -3.603579 | -3.842704 | 0.492325  |
| C | -1.820385 | -4.997087 | 0.917077  |
| H | -2.277736 | -5.937258 | 0.581979  |
| H | -1.204366 | -5.245209 | 1.794854  |
| C | 1.705727  | -0.896743 | 4.337146  |
| H | 2.252752  | 0.052091  | 4.241653  |
| H | 2.455184  | -1.667380 | 4.561714  |
| C | -0.425123 | 0.210514  | 5.159163  |
| H | -1.172622 | 0.224328  | 5.963005  |
| H | 0.000734  | 1.223645  | 5.109649  |
| C | 0.690764  | -0.793415 | 5.486054  |

|   |           |           |           |
|---|-----------|-----------|-----------|
| H | 1.197397  | -0.510001 | 6.417582  |
| H | 0.243391  | -1.783147 | 5.661935  |
| C | -5.352942 | -0.728979 | 0.620993  |
| C | -6.153612 | -2.841979 | -1.030244 |
| C | -5.171170 | 2.278274  | -0.961265 |
| C | -4.600470 | 4.460235  | 0.693654  |
| C | -6.405602 | -1.540510 | 0.983279  |
| H | -6.925061 | -1.357760 | 1.920295  |
| C | -6.819330 | -2.607727 | 0.150546  |
| H | -7.654073 | -3.236817 | 0.446846  |
| H | -5.054695 | 0.080563  | 1.277136  |
| H | -6.452154 | -3.660563 | -1.681377 |
| H | -4.362639 | 5.303354  | 1.338146  |
| H | -5.404463 | 1.446085  | -1.614653 |
| C | -5.704859 | 4.494111  | -0.126481 |
| H | -6.356160 | 5.363772  | -0.136672 |
| C | -5.984924 | 3.390684  | -0.965370 |
| H | -6.851141 | 3.419101  | -1.620957 |
| H | 5.941849  | 1.508667  | 2.612205  |
| C | 1.905904  | 2.876930  | 0.871624  |
| C | 3.992117  | 3.368737  | 2.650653  |
| C | 1.848705  | 3.960489  | 1.722374  |
| H | 0.986665  | 4.621856  | 1.695749  |
| C | 2.913008  | 4.220926  | 2.615784  |
| H | 2.873120  | 5.084243  | 3.275012  |
| H | 4.810467  | 3.542685  | 3.345609  |
| H | 1.086776  | 2.688609  | 0.182495  |

Sum of electronic and thermal Free Energies= -2474.356047

### TS6

|    |           |           |           |
|----|-----------|-----------|-----------|
| Pd | 0.999855  | 0.458932  | -0.530123 |
| P  | -0.641714 | -0.520437 | 1.062202  |
| P  | 3.130627  | -1.768523 | -1.821643 |
| C  | 3.721421  | -0.624130 | -0.516545 |
| C  | 4.986008  | -1.007774 | 0.004084  |
| C  | 5.566858  | -0.332086 | 1.043710  |
| C  | 4.826762  | 0.677992  | 1.714028  |
| C  | 3.531447  | 1.058490  | 1.224603  |
| C  | 3.007779  | 0.519249  | -0.036982 |
| C  | 2.569078  | 1.800823  | -1.290467 |
| C  | 2.076666  | 3.141420  | -1.134414 |
| C  | 2.399474  | 4.102778  | -2.109049 |
| C  | 3.163439  | 3.819793  | -3.236263 |
| C  | 3.624372  | 2.518257  | -3.411587 |
| C  | 3.338301  | 1.553508  | -2.451382 |
| C  | 0.095178  | -0.648338 | 2.848489  |
| C  | 1.222845  | -1.700274 | 2.890592  |
| C  | -0.848304 | -0.829544 | 4.054296  |

|   |           |           |           |
|---|-----------|-----------|-----------|
| C | -1.584160 | -2.162519 | 0.663043  |
| C | -0.617375 | -3.230089 | 0.117834  |
| C | -2.491821 | -2.745354 | 1.757734  |
| C | -1.916958 | 0.895404  | 1.160680  |
| C | -1.735369 | 1.843462  | 2.212244  |
| C | -2.497304 | 2.979350  | 2.315196  |
| C | -3.498778 | 3.266560  | 1.355977  |
| C | -3.680839 | 2.354359  | 0.267619  |
| C | -2.868672 | 1.162794  | 0.172282  |
| C | -3.134662 | 0.230613  | -0.978124 |
| C | -4.313807 | -0.594312 | -0.884060 |
| C | -4.622758 | -1.539105 | -1.915828 |
| C | -3.731743 | -1.647820 | -3.009041 |
| C | -2.622712 | -0.847144 | -3.099816 |
| C | -2.302192 | 0.129666  | -2.107106 |
| N | -1.139636 | 0.947655  | -2.293769 |
| C | -1.408847 | 2.397463  | -2.338113 |
| C | -0.287783 | 0.590554  | -3.442911 |
| O | 1.648663  | -1.797209 | -2.217815 |
| O | 3.721816  | -3.289156 | -1.376756 |
| O | 4.199548  | -1.533201 | -3.095230 |
| C | 2.963259  | -4.076552 | -0.454818 |
| C | 4.034904  | -2.358378 | -4.259955 |
| C | 1.165149  | 3.666129  | -0.035093 |
| H | 5.496077  | -1.857751 | -0.437667 |
| H | 0.793374  | -2.707840 | 2.804441  |
| H | 1.900830  | -1.560154 | 2.041703  |
| H | -1.668983 | -0.104845 | 4.034090  |
| H | -1.310721 | -1.820873 | 4.021953  |
| H | 0.058227  | -3.565185 | 0.916797  |
| H | 0.005465  | -2.804841 | -0.675596 |
| H | -2.219747 | -1.861927 | -0.171405 |
| H | -0.967358 | 1.673879  | 2.955682  |
| H | -2.336139 | 3.672754  | 3.137470  |
| H | -1.981709 | -0.959410 | -3.962651 |
| H | -3.942846 | -2.369219 | -3.795096 |
| H | -1.880119 | -3.085237 | 2.602468  |
| H | -3.179735 | -1.983206 | 2.140990  |
| H | -2.024586 | 2.663164  | -3.213731 |
| H | -0.453541 | 2.921316  | -2.411476 |
| H | -1.915464 | 2.734714  | -1.438365 |
| H | 0.055173  | -0.441381 | -3.363311 |
| H | 0.596137  | 1.229470  | -3.415921 |
| H | -0.798003 | 0.754194  | -4.407978 |
| H | 2.868966  | -3.574043 | 0.515841  |
| H | 3.520586  | -5.007252 | -0.323640 |
| H | 1.967044  | -4.296275 | -0.850148 |
| H | 3.020223  | -2.268849 | -4.661693 |
| H | 4.247448  | -3.405402 | -4.022052 |

|   |           |           |           |
|---|-----------|-----------|-----------|
| H | 4.756578  | -1.991017 | -4.992553 |
| H | 0.593797  | 0.323700  | 2.951840  |
| H | 3.780732  | 0.581265  | -2.603630 |
| H | 2.011104  | 5.110671  | -1.976191 |
| H | 4.226947  | 2.249148  | -4.275327 |
| H | 3.390962  | 4.600569  | -3.957269 |
| H | 0.510405  | 2.896073  | 0.376007  |
| H | 1.740683  | 4.112030  | 0.784411  |
| H | 0.521684  | 4.455258  | -0.439277 |
| C | -1.405737 | -4.441978 | -0.412110 |
| H | -1.996705 | -4.125920 | -1.283740 |
| H | -0.708033 | -5.210642 | -0.770702 |
| C | -3.283108 | -3.952869 | 1.219727  |
| H | -3.903354 | -4.372516 | 2.022832  |
| H | -3.972818 | -3.616010 | 0.434699  |
| C | -2.343952 | -5.028133 | 0.653403  |
| H | -2.926461 | -5.858714 | 0.233885  |
| H | -1.742121 | -5.451045 | 1.472341  |
| C | 2.010603  | -1.598922 | 4.209335  |
| H | 2.537453  | -0.635156 | 4.234724  |
| H | 2.783423  | -2.377848 | 4.237726  |
| C | -0.058575 | -0.700681 | 5.371399  |
| H | -0.736437 | -0.837633 | 6.224069  |
| H | 0.348292  | 0.318183  | 5.454695  |
| C | 1.092754  | -1.715799 | 5.434877  |
| H | 1.670880  | -1.578107 | 6.357657  |
| H | 0.671757  | -2.731617 | 5.478717  |
| C | -5.203329 | -0.535458 | 0.231012  |
| C | -5.787690 | -2.346339 | -1.820005 |
| C | -4.668748 | 2.681291  | -0.706662 |
| C | -4.301545 | 4.435235  | 1.442892  |
| C | -6.325687 | -1.332043 | 0.298310  |
| H | -6.983827 | -1.256865 | 1.159932  |
| C | -6.631384 | -2.245830 | -0.738078 |
| H | -7.522071 | -2.864584 | -0.673373 |
| H | -4.993257 | 0.151196  | 1.042273  |
| H | -5.997297 | -3.048818 | -2.623506 |
| H | -4.145295 | 5.110152  | 2.281272  |
| H | -4.818658 | 2.014723  | -1.547900 |
| C | -5.251656 | 4.712503  | 0.487121  |
| H | -5.860295 | 5.609540  | 0.560947  |
| C | -5.429807 | 3.824650  | -0.600072 |
| H | -6.175169 | 4.046438  | -1.359151 |
| H | 6.553161  | -0.606423 | 1.407582  |
| C | 2.775392  | 1.937349  | 2.037862  |
| C | 5.327903  | 1.266612  | 2.905370  |
| C | 3.268966  | 2.471830  | 3.213865  |
| H | 2.646012  | 3.133533  | 3.810418  |
| C | 4.573915  | 2.153608  | 3.642218  |



H 4.971312 2.585733 4.556992  
H 6.320758 0.976733 3.241965  
H 1.762411 2.157031 1.741065

Sum of electronic and thermal Free Energies= -2474.350811

**TS7**

Pd 1.157021 0.304736 -0.647477  
P -0.684203 -0.620362 0.733127  
P 4.490207 -1.422995 -0.041268  
C 4.113952 0.309548 0.435296  
C 5.034776 0.830930 1.385598  
C 4.853528 2.055362 1.969657  
C 3.687310 2.805046 1.678746  
C 2.756603 2.312785 0.704393  
C 3.000969 1.055379 -0.011203  
C 2.698733 1.149299 -1.901572  
C 2.862440 0.183736 -2.944277  
C 3.250432 0.624448 -4.222074  
C 3.473640 1.961603 -4.526580  
C 3.286174 2.911982 -3.525087  
C 2.908877 2.504918 -2.249645  
C -0.015619 -0.977124 2.517623  
C 0.981862 -2.151505 2.506103  
C -1.032403 -1.133096 3.663849  
C -1.541148 -2.222412 0.077596  
C -0.508802 -3.110400 -0.648805  
C -2.368083 -3.039247 1.085819  
C -1.968163 0.766562 1.000315  
C -1.585805 1.697719 2.014720  
C -2.322614 2.815641 2.303564  
C -3.501289 3.109532 1.575583  
C -3.887903 2.223155 0.520229  
C -3.101836 1.040303 0.233015  
C -3.590538 0.165676 -0.887521  
C -4.732766 -0.671645 -0.636943  
C -5.251519 -1.517700 -1.671898  
C -4.614262 -1.500334 -2.935933  
C -3.532981 -0.689069 -3.169069  
C -2.994009 0.166065 -2.159597  
N -1.840172 0.939409 -2.453506  
C -1.958773 2.398369 -2.398014  
C -1.043592 0.532939 -3.606990  
O 3.359266 -2.455747 -0.004088  
O 5.770817 -1.901137 0.955477  
O 5.337386 -1.286326 -1.472260  
C 5.462068 -2.697871 2.107716  
C 5.901853 -2.485184 -2.028648  
C 2.524181 -1.293049 -2.859054

|   |           |           |           |
|---|-----------|-----------|-----------|
| H | 5.902646  | 0.234361  | 1.640669  |
| H | 0.442943  | -3.093762 | 2.340050  |
| H | 1.702661  | -2.049869 | 1.688114  |
| H | -1.742190 | -0.299343 | 3.678158  |
| H | -1.622528 | -2.044486 | 3.520012  |
| H | 0.248777  | -3.476870 | 0.054479  |
| H | 0.033458  | -2.518043 | -1.393531 |
| H | -2.225160 | -1.837954 | -0.681750 |
| H | -0.673897 | 1.530567  | 2.574206  |
| H | -2.000183 | 3.493225  | 3.090603  |
| H | -3.088968 | -0.683753 | -4.157083 |
| H | -5.002994 | -2.130121 | -3.732982 |
| H | -1.713959 | -3.423010 | 1.878602  |
| H | -3.124989 | -2.409309 | 1.565788  |
| H | -2.477556 | 2.799111  | -3.287025 |
| H | -0.954391 | 2.832947  | -2.362205 |
| H | -2.500863 | 2.716677  | -1.511015 |
| H | -0.871606 | -0.546307 | -3.589078 |
| H | -0.071455 | 1.030207  | -3.547241 |
| H | -1.503226 | 0.802685  | -4.575459 |
| H | 5.108705  | -2.067131 | 2.933118  |
| H | 6.395294  | -3.185325 | 2.400021  |
| H | 4.703165  | -3.448994 | 1.872416  |
| H | 5.132721  | -3.251510 | -2.171772 |
| H | 6.694050  | -2.872588 | -1.380421 |
| H | 6.320507  | -2.197165 | -2.994890 |
| H | 0.579703  | -0.075544 | 2.712444  |
| H | 2.811158  | 3.272543  | -1.495291 |
| H | 3.359721  | -0.125142 | -5.003922 |
| H | 3.447106  | 3.968783  | -3.722814 |
| H | 3.784601  | 2.254577  | -5.526049 |
| H | 2.439355  | -1.676170 | -1.842851 |
| H | 1.566110  | -1.480015 | -3.362874 |
| H | 3.279497  | -1.888010 | -3.386218 |
| C | -1.201136 | -4.304238 | -1.328645 |
| H | -1.860646 | -3.930701 | -2.126218 |
| H | -0.447653 | -4.938518 | -1.813098 |
| C | -3.050751 | -4.235740 | 0.396276  |
| H | -3.604193 | -4.819991 | 1.143139  |
| H | -3.793738 | -3.863288 | -0.321876 |
| C | -2.032821 | -5.124361 | -0.332736 |
| H | -2.545925 | -5.946234 | -0.848889 |
| H | -1.360065 | -5.588408 | 0.404171  |
| C | 1.714549  | -2.236661 | 3.856955  |
| H | 2.333505  | -1.336113 | 3.986477  |
| H | 2.403381  | -3.091356 | 3.848348  |
| C | -0.299354 | -1.218003 | 5.016643  |
| H | -1.029460 | -1.352890 | 5.825422  |
| H | 0.209240  | -0.261914 | 5.211498  |

|   |           |           |           |
|---|-----------|-----------|-----------|
| C | 0.734598  | -2.354621 | 5.033635  |
| H | 1.278511  | -2.358670 | 5.987256  |
| H | 0.209584  | -3.319436 | 4.969307  |
| C | -5.375874 | -0.724990 | 0.635910  |
| C | -6.375738 | -2.347566 | -1.414058 |
| C | -5.050155 | 2.567505  | -0.230602 |
| C | -4.279963 | 4.263370  | 1.855910  |
| C | -6.461376 | -1.543798 | 0.857461  |
| H | -6.929511 | -1.559205 | 1.838187  |
| C | -6.975634 | -2.362866 | -0.176140 |
| H | -7.835397 | -2.999936 | 0.011684  |
| H | -4.999563 | -0.107279 | 1.443051  |
| H | -6.751985 | -2.973927 | -2.219839 |
| H | -3.965183 | 4.916245  | 2.666767  |
| H | -5.362236 | 1.927327  | -1.047311 |
| C | -5.403084 | 4.555572  | 1.116561  |
| H | -5.992076 | 5.441658  | 1.336946  |
| C | -5.784061 | 3.697752  | 0.058968  |
| H | -6.665321 | 3.930845  | -0.532680 |
| H | 5.579156  | 2.445839  | 2.678132  |
| C | 1.577384  | 3.088542  | 0.500060  |
| C | 3.422770  | 4.023044  | 2.363471  |
| C | 1.335636  | 4.259540  | 1.188225  |
| H | 0.416472  | 4.809085  | 1.005303  |
| C | 2.273991  | 4.741324  | 2.127705  |
| H | 2.084826  | 5.668238  | 2.663050  |
| H | 4.151368  | 4.369634  | 3.092817  |
| H | 0.841500  | 2.729053  | -0.213388 |

Sum of electronic and thermal Free Energies= -2474.352748

### TS8

|    |           |           |           |
|----|-----------|-----------|-----------|
| Pd | 1.186484  | 0.433055  | -0.429495 |
| P  | -0.690460 | -0.490618 | 0.969857  |
| P  | 3.587639  | -1.862210 | -1.465137 |
| C  | 4.100849  | -0.403430 | -0.482183 |
| C  | 5.441004  | -0.515764 | -0.011375 |
| C  | 5.930334  | 0.322535  | 0.952687  |
| C  | 5.032987  | 1.186284  | 1.638846  |
| C  | 3.670550  | 1.279381  | 1.202411  |
| C  | 3.226937  | 0.617828  | -0.028627 |
| C  | 2.480355  | 1.880030  | -1.273615 |
| C  | 2.078835  | 3.119557  | -0.714083 |
| C  | 2.040193  | 4.306504  | -1.441718 |
| C  | 2.440454  | 4.308676  | -2.775280 |
| C  | 2.860462  | 3.111490  | -3.346397 |
| C  | 2.887586  | 1.895105  | -2.642424 |
| C  | -0.189756 | -0.617657 | 2.840190  |
| C  | 0.798597  | -1.774391 | 3.077573  |

|   |           |           |           |
|---|-----------|-----------|-----------|
| C | -1.307198 | -0.629868 | 3.900434  |
| C | -1.570083 | -2.137003 | 0.471018  |
| C | -0.532691 | -3.177706 | 0.002540  |
| C | -2.549060 | -2.756108 | 1.483939  |
| C | -1.940524 | 0.957414  | 0.962983  |
| C | -1.629875 | 1.991967  | 1.898589  |
| C | -2.358799 | 3.148406  | 1.988400  |
| C | -3.458074 | 3.375341  | 1.125013  |
| C | -3.767832 | 2.380862  | 0.143676  |
| C | -2.988193 | 1.162598  | 0.064219  |
| C | -3.373835 | 0.176848  | -1.001916 |
| C | -4.559821 | -0.611246 | -0.801219 |
| C | -4.967108 | -1.566753 | -1.789602 |
| C | -4.169000 | -1.715404 | -2.949477 |
| C | -3.045793 | -0.950129 | -3.136558 |
| C | -2.626158 | 0.024438  | -2.180782 |
| N | -1.443651 | 0.777150  | -2.423044 |
| C | -1.609009 | 2.226529  | -2.599162 |
| C | -0.528782 | 0.248224  | -3.435478 |
| O | 2.132380  | -2.000447 | -1.925837 |
| O | 4.134057  | -3.190606 | -0.575465 |
| O | 4.751626  | -1.983432 | -2.661948 |
| C | 3.366106  | -3.635750 | 0.543949  |
| C | 4.683033  | -3.119370 | -3.538967 |
| H | 6.081908  | -1.277110 | -0.445039 |
| H | 0.283809  | -2.737559 | 2.964736  |
| H | 1.595731  | -1.744177 | 2.326748  |
| H | -2.011495 | 0.192605  | 3.738946  |
| H | -1.885556 | -1.556195 | 3.824726  |
| H | 0.070948  | -3.511299 | 0.858098  |
| H | 0.160792  | -2.737267 | -0.721099 |
| H | -2.140808 | -1.840671 | -0.411634 |
| H | -0.785048 | 1.870609  | 2.565141  |
| H | -2.095254 | 3.905764  | 2.723075  |
| H | -2.472515 | -1.079431 | -4.045793 |
| H | -4.465455 | -2.438800 | -3.705694 |
| H | -2.000845 | -3.075871 | 2.379379  |
| H | -3.296969 | -2.023306 | 1.805520  |
| H | -2.039983 | 2.466210  | -3.587357 |
| H | -0.629377 | 2.706498  | -2.520824 |
| H | -2.255829 | 2.645042  | -1.832114 |
| H | -0.281811 | -0.795093 | -3.226358 |
| H | 0.395271  | 0.827262  | -3.386233 |
| H | -0.922503 | 0.334438  | -4.464675 |
| H | 3.370319  | -2.888331 | 1.346733  |
| H | 3.851264  | -4.547224 | 0.901865  |
| H | 2.334546  | -3.857542 | 0.254755  |
| H | 3.705019  | -3.174359 | -4.028687 |
| H | 4.872488  | -4.045451 | -2.987403 |

|   |           |           |           |
|---|-----------|-----------|-----------|
| H | 5.462610  | -2.966421 | -4.288182 |
| H | 0.394200  | 0.301086  | 2.977035  |
| H | 1.706724  | 5.220865  | -0.957427 |
| H | 3.177102  | 3.102866  | -4.387024 |
| H | 2.434343  | 5.224315  | -3.360837 |
| C | -1.242896 | -4.398822 | -0.608013 |
| H | -1.775458 | -4.083366 | -1.517051 |
| H | -0.497059 | -5.139805 | -0.923695 |
| C | -3.252677 | -3.987114 | 0.880597  |
| H | -3.916445 | -4.433810 | 1.632562  |
| H | -3.894540 | -3.664526 | 0.050455  |
| C | -2.241369 | -5.026741 | 0.375197  |
| H | -2.765985 | -5.868212 | -0.096008 |
| H | -1.689903 | -5.443106 | 1.232029  |
| C | 1.400058  | -1.689100 | 4.492161  |
| H | 2.012737  | -0.779017 | 4.564151  |
| H | 2.077956  | -2.536327 | 4.658603  |
| C | -0.703768 | -0.534258 | 5.314627  |
| H | -1.506654 | -0.563864 | 6.062584  |
| H | -0.203699 | 0.438871  | 5.431018  |
| C | 0.309160  | -1.659446 | 5.573308  |
| H | 0.761821  | -1.544150 | 6.566478  |
| H | -0.219507 | -2.624432 | 5.581013  |
| C | -5.359198 | -0.505019 | 0.375940  |
| C | -6.140537 | -2.341968 | -1.586058 |
| C | -4.846980 | 2.653001  | -0.747067 |
| C | -4.231425 | 4.563708  | 1.201004  |
| C | -6.489142 | -1.274206 | 0.547640  |
| H | -7.078307 | -1.166278 | 1.454539  |
| C | -6.893390 | -2.200769 | -0.443277 |
| H | -7.789791 | -2.796917 | -0.296912 |
| H | -5.069226 | 0.198170  | 1.148111  |
| H | -6.430082 | -3.053841 | -2.355866 |
| H | -3.976421 | 5.300376  | 1.959356  |
| H | -5.094136 | 1.927883  | -1.513156 |
| C | -5.275237 | 4.784396  | 0.331962  |
| H | -5.860982 | 5.697270  | 0.396389  |
| C | -5.577916 | 3.817795  | -0.654903 |
| H | -6.395330 | 3.994540  | -1.348796 |
| H | 6.970329  | 0.271708  | 1.263369  |
| C | 2.770116  | 1.971513  | 2.054306  |
| C | 5.448548  | 1.886307  | 2.802168  |
| C | 3.188144  | 2.608015  | 3.207789  |
| H | 2.462705  | 3.113657  | 3.839911  |
| C | 4.551015  | 2.594476  | 3.570899  |
| H | 4.883111  | 3.111703  | 4.467218  |
| H | 6.493154  | 1.818904  | 3.097543  |
| H | 1.714481  | 1.946242  | 1.804960  |
| C | 3.358760  | 0.693229  | -3.414111 |

|   |          |           |           |
|---|----------|-----------|-----------|
| H | 3.491829 | 0.949166  | -4.470518 |
| H | 4.325755 | 0.337156  | -3.044625 |
| H | 2.656840 | -0.142030 | -3.356425 |
| H | 1.796581 | 3.173686  | 0.325016  |

Sum of electronic and thermal Free Energies= -2474.354448

### TS9

|    |           |           |           |
|----|-----------|-----------|-----------|
| Pd | 1.613728  | -0.711776 | -0.866893 |
| P  | -0.713213 | -1.031873 | 0.013166  |
| C  | 4.524822  | -0.897545 | -2.341492 |
| C  | 5.516334  | -1.888081 | -2.454945 |
| C  | 5.703927  | -2.891064 | -1.506641 |
| C  | 4.890242  | -2.910381 | -0.379377 |
| C  | 3.916546  | -1.923542 | -0.218595 |
| C  | 3.686382  | -0.919407 | -1.189710 |
| C  | 2.946280  | 0.875937  | -0.569560 |
| C  | 3.493815  | 1.305028  | 0.654180  |
| C  | 3.938070  | 2.642307  | 0.850875  |
| C  | 3.813527  | 3.587291  | -0.133072 |
| C  | 3.157215  | 3.260578  | -1.344580 |
| C  | 2.703826  | 1.914943  | -1.559181 |
| C  | -0.440576 | -2.173968 | 1.555741  |
| C  | 0.126751  | -3.547628 | 1.154526  |
| C  | -1.607825 | -2.314158 | 2.548202  |
| C  | -1.935585 | -1.894511 | -1.198365 |
| C  | -1.124110 | -2.710201 | -2.230056 |
| C  | -3.054898 | -2.756983 | -0.589088 |
| C  | -1.419825 | 0.534931  | 0.843112  |
| C  | -0.481971 | 1.022127  | 1.807043  |
| C  | -0.724016 | 2.142541  | 2.555441  |
| C  | -1.919711 | 2.882388  | 2.381955  |
| C  | -2.862721 | 2.436424  | 1.401978  |
| C  | -2.600917 | 1.240046  | 0.623026  |
| C  | -3.668705 | 0.850858  | -0.361639 |
| C  | -4.871730 | 0.245336  | 0.138876  |
| C  | -5.947029 | -0.074238 | -0.755199 |
| C  | -5.795517 | 0.232010  | -2.129504 |
| C  | -4.643888 | 0.814523  | -2.596591 |
| C  | -3.557020 | 1.136434  | -1.729951 |
| N  | -2.364667 | 1.684891  | -2.276430 |
| C  | -2.042569 | 3.074552  | -1.943192 |
| C  | -2.100948 | 1.412219  | -3.682344 |
| H  | -0.629938 | -4.137096 | 0.619319  |
| H  | 0.976305  | -3.419401 | 0.472246  |
| H  | -1.972956 | -1.324730 | 2.846252  |
| H  | -2.451272 | -2.837280 | 2.083078  |
| H  | -0.597367 | -3.533267 | -1.727929 |
| H  | -0.350152 | -2.077376 | -2.682874 |

|   |           |           |           |
|---|-----------|-----------|-----------|
| H | -2.396421 | -1.058528 | -1.730171 |
| H | 0.453517  | 0.491348  | 1.953626  |
| H | 0.010530  | 2.480027  | 3.282829  |
| H | -4.564235 | 1.053749  | -3.651066 |
| H | -6.611137 | 0.009541  | -2.814012 |
| H | -2.614247 | -3.595504 | -0.035334 |
| H | -3.646960 | -2.178483 | 0.124582  |
| H | -2.665116 | 3.786664  | -2.515121 |
| H | -0.991847 | 3.264551  | -2.182950 |
| H | -2.189464 | 3.265572  | -0.882532 |
| H | -2.281540 | 0.357356  | -3.908371 |
| H | -1.046389 | 1.627823  | -3.878480 |
| H | -2.701422 | 2.027531  | -4.378376 |
| H | 0.374395  | -1.646555 | 2.062938  |
| C | -2.040449 | -3.289371 | -3.322467 |
| H | -2.473159 | -2.461052 | -3.903822 |
| H | -1.445908 | -3.887855 | -4.024884 |
| C | -3.971686 | -3.327442 | -1.687276 |
| H | -4.745959 | -3.955324 | -1.227762 |
| H | -4.495215 | -2.500407 | -2.185822 |
| C | -3.176964 | -4.131627 | -2.724856 |
| H | -3.841108 | -4.492894 | -3.520797 |
| H | -2.749847 | -5.024627 | -2.244400 |
| C | 0.576330  | -4.324788 | 2.404748  |
| H | 1.414442  | -3.787883 | 2.869956  |
| H | 0.953370  | -5.313707 | 2.112326  |
| C | -1.153640 | -3.098636 | 3.794560  |
| H | -1.999153 | -3.220414 | 4.484515  |
| H | -0.391450 | -2.512965 | 4.328195  |
| C | -0.566526 | -4.468109 | 3.421060  |
| H | -0.211594 | -4.987033 | 4.321028  |
| H | -1.359938 | -5.097590 | 2.989930  |
| C | -5.042633 | -0.083169 | 1.516840  |
| C | -7.126119 | -0.687656 | -0.252975 |
| C | -4.042596 | 3.217008  | 1.226472  |
| C | -2.187892 | 4.049752  | 3.144574  |
| C | -3.343587 | 4.771934  | 2.952996  |
| H | -3.539248 | 5.664035  | 3.541828  |
| C | -4.275935 | 4.348617  | 1.978422  |
| H | -5.186635 | 4.919946  | 1.819259  |
| C | -6.195688 | -0.683171 | 1.972364  |
| H | -6.294627 | -0.923066 | 3.027736  |
| C | -7.254545 | -0.987780 | 1.083237  |
| H | -8.160087 | -1.457296 | 1.457444  |
| H | -4.771303 | 2.915094  | 0.483788  |
| H | -1.454412 | 4.363788  | 3.883639  |
| H | -4.244067 | 0.142067  | 2.214324  |
| H | -7.927396 | -0.917934 | -0.951644 |
| H | 6.482512  | -3.636445 | -1.647738 |

|   |          |           |           |
|---|----------|-----------|-----------|
| H | 4.173948 | 4.600441  | 0.024150  |
| H | 3.318740 | -1.948772 | 0.685148  |
| H | 5.010919 | -3.671015 | 0.387493  |
| C | 4.468319 | 0.104849  | -3.472060 |
| H | 5.253587 | -0.117359 | -4.201563 |
| H | 3.512685 | 0.086228  | -4.003127 |
| H | 4.617301 | 1.131054  | -3.123829 |
| H | 6.158365 | -1.866512 | -3.332944 |
| C | 1.956178 | 1.668248  | -2.745468 |
| C | 2.908341 | 4.256256  | -2.329128 |
| C | 1.709573 | 2.655598  | -3.675309 |
| H | 1.145963 | 2.423903  | -4.575078 |
| C | 2.202538 | 3.965813  | -3.473103 |
| H | 2.015470 | 4.738324  | -4.214397 |
| H | 3.273952 | 5.264030  | -2.146373 |
| H | 1.572207 | 0.662689  | -2.901317 |
| H | 4.366776 | 2.915893  | 1.807188  |
| P | 3.597819 | 0.241073  | 2.154950  |
| O | 2.469424 | -0.750458 | 2.443685  |
| O | 5.075491 | -0.560480 | 2.251529  |
| O | 3.758752 | 1.409895  | 3.355559  |
| C | 6.260169 | 0.090828  | 1.779859  |
| H | 7.074301 | -0.618680 | 1.941329  |
| H | 6.188374 | 0.320660  | 0.711444  |
| H | 6.461492 | 1.009847  | 2.343332  |
| C | 3.661374 | 0.941179  | 4.711233  |
| H | 2.710406 | 0.425479  | 4.873867  |
| H | 4.488613 | 0.263511  | 4.949369  |
| H | 3.719744 | 1.831124  | 5.341141  |

Sum of electronic and thermal Free Energies= -2474.353336

### TS10

|    |           |           |           |
|----|-----------|-----------|-----------|
| Pd | -1.426513 | -0.459251 | 0.319082  |
| P  | 0.868992  | -0.958132 | -0.668810 |
| C  | -3.218070 | -2.747573 | 0.765321  |
| C  | -4.075564 | -3.780849 | 0.349652  |
| C  | -5.042831 | -3.604365 | -0.633021 |
| C  | -5.154291 | -2.354957 | -1.238388 |
| C  | -4.326518 | -1.311173 | -0.833119 |
| C  | -3.349440 | -1.457096 | 0.172331  |
| C  | -3.184044 | 0.383295  | 0.935124  |
| C  | -3.384159 | 1.519468  | 0.114093  |
| C  | -3.951260 | 2.722104  | 0.625496  |
| C  | -4.358181 | 2.818281  | 1.928603  |
| C  | -4.215854 | 1.712673  | 2.801740  |
| C  | -3.630201 | 0.491638  | 2.315780  |
| C  | 0.452955  | -1.667043 | -2.429104 |
| C  | -0.186629 | -3.066011 | -2.321281 |



|   |           |           |           |
|---|-----------|-----------|-----------|
| C | 1.541435  | -1.656897 | -3.519517 |
| C | 2.174746  | -2.119451 | 0.160466  |
| C | 1.494836  | -3.264197 | 0.934892  |
| C | 3.287296  | -2.662474 | -0.752463 |
| C | 1.729107  | 0.709693  | -1.045146 |
| C | 1.253459  | 1.345541  | -2.233045 |
| C | 1.738273  | 2.554252  | -2.660151 |
| C | 2.706890  | 3.255765  | -1.902896 |
| C | 3.145165  | 2.683967  | -0.666634 |
| C | 2.649394  | 1.389714  | -0.242745 |
| C | 3.183534  | 0.862817  | 1.059653  |
| C | 4.537084  | 0.375597  | 1.092758  |
| C | 5.091694  | -0.138613 | 2.311011  |
| C | 4.275913  | -0.150548 | 3.468294  |
| C | 2.992869  | 0.332560  | 3.431291  |
| C | 2.414823  | 0.859911  | 2.235688  |
| N | 1.071709  | 1.312425  | 2.258377  |
| C | 0.812253  | 2.722795  | 1.958492  |
| C | 0.235630  | 0.857968  | 3.363519  |
| H | 0.567230  | -3.806068 | -2.017516 |
| H | -0.971901 | -3.068102 | -1.557216 |
| H | 2.014666  | -0.673141 | -3.599504 |
| H | 2.336811  | -2.367331 | -3.271068 |
| H | 0.972040  | -3.935517 | 0.240274  |
| H | 0.735209  | -2.856919 | 1.608809  |
| H | 2.639635  | -1.469514 | 0.904354  |
| H | 0.461940  | 0.879239  | -2.802954 |
| H | 1.371578  | 2.992249  | -3.585945 |
| H | 2.409826  | 0.334550  | 4.344194  |
| H | 4.686168  | -0.532879 | 4.400361  |
| H | 2.851378  | -3.325377 | -1.510105 |
| H | 3.782700  | -1.843774 | -1.285527 |
| H | 1.039517  | 3.370747  | 2.823917  |
| H | -0.246272 | 2.843058  | 1.706718  |
| H | 1.403336  | 3.061660  | 1.111378  |
| H | 0.341035  | -0.220774 | 3.503178  |
| H | -0.808293 | 1.061514  | 3.112713  |
| H | 0.457975  | 1.365281  | 4.320438  |
| H | -0.352717 | -0.988974 | -2.732268 |
| C | 2.531387  | -4.070654 | 1.738319  |
| H | 2.961573  | -3.421839 | 2.515247  |
| H | 2.032731  | -4.898258 | 2.260061  |
| C | 4.323453  | -3.464091 | 0.056810  |
| H | 5.088943  | -3.863912 | -0.621192 |
| H | 4.841950  | -2.790596 | 0.751700  |
| C | 3.659651  | -4.603041 | 0.843575  |
| H | 4.405546  | -5.135213 | 1.448124  |
| H | 3.245223  | -5.339260 | 0.138280  |
| C | -0.785846 | -3.486003 | -3.676186 |

|   |           |           |           |
|---|-----------|-----------|-----------|
| H | -1.619739 | -2.811476 | -3.915579 |
| H | -1.210613 | -4.495168 | -3.595934 |
| C | 0.931215  | -2.055994 | -4.876781 |
| H | 1.711637  | -2.054451 | -5.649276 |
| H | 0.189268  | -1.301453 | -5.176175 |
| C | 0.255369  | -3.433352 | -4.804009 |
| H | -0.213166 | -3.679927 | -5.765729 |
| H | 1.023624  | -4.201008 | -4.624928 |
| C | 5.368625  | 0.347938  | -0.066788 |
| C | 6.426402  | -0.625172 | 2.334415  |
| C | 4.062929  | 3.444073  | 0.116651  |
| C | 3.216899  | 4.512166  | -2.324877 |
| C | 4.116843  | 5.207102  | -1.550133 |
| H | 4.500061  | 6.168853  | -1.880310 |
| C | 4.533944  | 4.666471  | -0.311798 |
| H | 5.233567  | 5.219432  | 0.309335  |
| C | 6.658204  | -0.134093 | -0.014495 |
| H | 7.265703  | -0.137598 | -0.915701 |
| C | 7.201780  | -0.622336 | 1.197828  |
| H | 8.221995  | -0.994929 | 1.225712  |
| H | 4.395181  | 3.051802  | 1.070402  |
| H | 2.873351  | 4.918380  | -3.273593 |
| H | 4.975187  | 0.716674  | -1.006858 |
| H | 6.822890  | -1.002647 | 3.274454  |
| H | -5.691011 | -4.427342 | -0.922296 |
| H | -4.787324 | 3.743097  | 2.305429  |
| H | -4.487218 | -0.356791 | -1.310704 |
| H | -5.892418 | -2.176404 | -2.016072 |
| C | -2.135992 | -3.170166 | 1.743660  |
| H | -2.563293 | -3.649260 | 2.635427  |
| H | -1.477382 | -3.907957 | 1.270608  |
| H | -1.501477 | -2.335647 | 2.052701  |
| H | -3.950098 | -4.762100 | 0.804832  |
| C | -3.520659 | -0.572928 | 3.250242  |
| C | -4.636419 | 1.812666  | 4.155088  |
| C | -3.936699 | -0.451758 | 4.559332  |
| H | -3.835487 | -1.297556 | 5.234218  |
| C | -4.499545 | 0.756303  | 5.024762  |
| H | -4.826234 | 0.846217  | 6.057305  |
| H | -5.072706 | 2.751273  | 4.488995  |
| H | -3.108425 | -1.510227 | 2.924117  |
| H | -4.026785 | 3.586733  | -0.022420 |
| P | -2.956150 | 1.640401  | -1.688243 |
| O | -1.932028 | 0.737587  | -2.367742 |
| O | -4.389887 | 1.538735  | -2.590779 |
| O | -2.602512 | 3.284147  | -1.790906 |
| C | -5.523519 | 2.350440  | -2.273218 |
| H | -6.268400 | 2.137342  | -3.043611 |
| H | -5.938249 | 2.098245  | -1.290386 |

|   |           |          |           |
|---|-----------|----------|-----------|
| H | -5.270944 | 3.416712 | -2.298658 |
| C | -2.071893 | 3.749808 | -3.042802 |
| H | -1.087749 | 3.312286 | -3.227781 |
| H | -2.744658 | 3.505933 | -3.872650 |
| H | -1.985158 | 4.833873 | -2.944280 |

Sum of electronic and thermal Free Energies= -2474.348451

**TS11**

|    |           |           |           |
|----|-----------|-----------|-----------|
| Pd | 1.633175  | -0.656825 | -0.909641 |
| P  | -0.676472 | -1.076763 | -0.013786 |
| C  | 4.446441  | -0.024514 | -2.525020 |
| C  | 5.557147  | -0.616615 | -3.117584 |
| C  | 6.045770  | -1.822138 | -2.618902 |
| C  | 5.386914  | -2.410334 | -1.547136 |
| C  | 4.256852  | -1.839263 | -0.932145 |
| C  | 3.763574  | -0.588722 | -1.421383 |
| C  | 2.907014  | 0.932352  | -0.561575 |
| C  | 3.388366  | 1.330376  | 0.703884  |
| C  | 3.605637  | 2.698669  | 1.027311  |
| C  | 3.337666  | 3.698081  | 0.131114  |
| C  | 2.783156  | 3.383662  | -1.134222 |
| C  | 2.554168  | 2.012014  | -1.483283 |
| C  | -0.457044 | -2.264872 | 1.504380  |
| C  | 0.022525  | -3.664182 | 1.078421  |
| C  | -1.631058 | -2.360193 | 2.495141  |
| C  | -1.899188 | -1.879322 | -1.265953 |
| C  | -1.093340 | -2.693592 | -2.303255 |
| C  | -3.056591 | -2.721088 | -0.699337 |
| C  | -1.367339 | 0.479563  | 0.851731  |
| C  | -0.427284 | 0.925467  | 1.833554  |
| C  | -0.660301 | 2.024088  | 2.616319  |
| C  | -1.845678 | 2.783901  | 2.460744  |
| C  | -2.790526 | 2.379259  | 1.464784  |
| C  | -2.541486 | 1.202650  | 0.651586  |
| C  | -3.619168 | 0.851093  | -0.337089 |
| C  | -4.827978 | 0.251287  | 0.157538  |
| C  | -5.914869 | -0.028922 | -0.735812 |
| C  | -5.768980 | 0.309740  | -2.103096 |
| C  | -4.612177 | 0.886373  | -2.564318 |
| C  | -3.514298 | 1.170823  | -1.698190 |
| N  | -2.320726 | 1.722876  | -2.238407 |
| C  | -1.992222 | 3.102808  | -1.870769 |
| C  | -2.072379 | 1.488572  | -3.654482 |
| H  | -0.775319 | -4.197813 | 0.545793  |
| H  | 0.868935  | -3.582592 | 0.387953  |
| H  | -1.943120 | -1.359362 | 2.813031  |
| H  | -2.500084 | -2.827871 | 2.017197  |
| H  | -0.603949 | -3.546789 | -1.813747 |

|   |           |           |           |
|---|-----------|-----------|-----------|
| H | -0.291236 | -2.074221 | -2.724830 |
| H | -2.323377 | -1.016376 | -1.785576 |
| H | 0.501258  | 0.379591  | 1.970292  |
| H | 0.072946  | 2.327936  | 3.359628  |
| H | -4.536917 | 1.151496  | -3.612885 |
| H | -6.593123 | 0.117229  | -2.786488 |
| H | -2.653369 | -3.584608 | -0.156264 |
| H | -3.645052 | -2.140913 | 0.015479  |
| H | -2.628636 | 3.830493  | -2.406873 |
| H | -0.947866 | 3.302371  | -2.128273 |
| H | -2.115764 | 3.261251  | -0.801735 |
| H | -2.263549 | 0.441926  | -3.908589 |
| H | -1.018225 | 1.701290  | -3.854244 |
| H | -2.675434 | 2.127703  | -4.326471 |
| H | 0.385522  | -1.791705 | 2.021799  |
| C | -2.005952 | -3.214467 | -3.427356 |
| H | -2.402634 | -2.357934 | -3.993210 |
| H | -1.416718 | -3.811480 | -4.135475 |
| C | -3.967931 | -3.237424 | -1.828603 |
| H | -4.768106 | -3.854142 | -1.399318 |
| H | -4.458705 | -2.383491 | -2.314621 |
| C | -3.177973 | -4.037554 | -2.873077 |
| H | -3.837836 | -4.357286 | -3.690098 |
| H | -2.786763 | -4.955638 | -2.409620 |
| C | 0.434436  | -4.487683 | 2.311884  |
| H | 1.304427  | -4.009462 | 2.782947  |
| H | 0.753112  | -5.490903 | 1.999463  |
| C | -1.221278 | -3.190694 | 3.726912  |
| H | -2.072481 | -3.277035 | 4.415145  |
| H | -0.428708 | -2.656268 | 4.269925  |
| C | -0.710638 | -4.584252 | 3.331266  |
| H | -0.381302 | -5.135157 | 4.221841  |
| H | -1.538278 | -5.163217 | 2.893814  |
| C | -4.994078 | -0.109844 | 1.527907  |
| C | -7.099666 | -0.636605 | -0.240259 |
| C | -3.960427 | 3.179175  | 1.310006  |
| C | -2.102819 | 3.929988  | 3.258680  |
| C | -3.249259 | 4.671348  | 3.086303  |
| H | -3.436653 | 5.546753  | 3.702271  |
| C | -4.182972 | 4.289625  | 2.095938  |
| H | -5.086197 | 4.876521  | 1.951524  |
| C | -6.153044 | -0.703367 | 1.977010  |
| H | -6.247819 | -0.968543 | 3.026706  |
| C | -7.223093 | -0.968765 | 1.088835  |
| H | -8.133174 | -1.433490 | 1.457991  |
| H | -4.689836 | 2.909460  | 0.555737  |
| H | -1.368349 | 4.211634  | 4.009733  |
| H | -4.187214 | 0.084753  | 2.224959  |
| H | -7.909620 | -0.836280 | -0.938349 |

|   |          |           |           |
|---|----------|-----------|-----------|
| H | 6.920113 | -2.297047 | -3.056545 |
| H | 3.525507 | 4.736897  | 0.388950  |
| H | 5.737475 | -3.367806 | -1.166314 |
| H | 6.041747 | -0.122367 | -3.955877 |
| C | 1.956934 | 1.762067  | -2.753573 |
| C | 2.439514 | 4.415609  | -2.050753 |
| C | 1.639248 | 2.780774  | -3.628145 |
| H | 1.202393 | 2.544725  | -4.594723 |
| C | 1.886291 | 4.127615  | -3.276313 |
| H | 1.636585 | 4.927080  | -3.968949 |
| H | 2.624791 | 5.446031  | -1.756642 |
| H | 1.753239 | 0.732286  | -3.031896 |
| H | 3.987677 | 2.944159  | 2.010063  |
| P | 3.658202 | 0.159413  | 2.092732  |
| O | 2.516484 | -0.769585 | 2.508622  |
| O | 5.065674 | -0.727530 | 1.846289  |
| O | 4.123444 | 1.201216  | 3.331992  |
| C | 6.240160 | -0.032596 | 1.402750  |
| H | 7.024052 | -0.789064 | 1.332132  |
| H | 6.084351 | 0.418647  | 0.417217  |
| H | 6.536089 | 0.738836  | 2.122383  |
| C | 4.129300 | 0.643936  | 4.657251  |
| H | 3.152064 | 0.218849  | 4.903211  |
| H | 4.896717 | -0.132788 | 4.749072  |
| H | 4.361230 | 1.472347  | 5.329694  |
| H | 4.129905 | 0.928022  | -2.924490 |
| C | 3.616097 | -2.711179 | 0.130910  |
| H | 4.383212 | -3.134049 | 0.788255  |
| H | 2.896649 | -2.187402 | 0.758584  |
| H | 3.096635 | -3.550288 | -0.350960 |

Sum of electronic and thermal Free Energies= -2474.350657

### TS12

|    |           |           |           |
|----|-----------|-----------|-----------|
| Pd | -1.680043 | -0.384672 | 0.915379  |
| P  | 0.641470  | -0.933984 | 0.141152  |
| C  | -3.198592 | 0.650257  | 3.074579  |
| C  | -3.881340 | 0.423845  | 4.266788  |
| C  | -4.960568 | -0.455184 | 4.283240  |
| C  | -5.317343 | -1.096927 | 3.101726  |
| C  | -4.628584 | -0.910883 | 1.891068  |
| C  | -3.525933 | -0.005200 | 1.861320  |
| C  | -3.123885 | 0.965303  | 0.239604  |
| C  | -3.789817 | 0.657653  | -0.968591 |
| C  | -4.574146 | 1.619361  | -1.667777 |
| C  | -4.677055 | 2.907948  | -1.219285 |
| C  | -3.832731 | 3.345895  | -0.163185 |
| C  | -2.997017 | 2.396047  | 0.510602  |
| C  | 0.528852  | -2.368525 | -1.155103 |

|   |           |           |           |
|---|-----------|-----------|-----------|
| C | -0.100875 | -3.638022 | -0.553821 |
| C | 1.800298  | -2.686033 | -1.959562 |
| C | 1.720713  | -1.516507 | 1.629482  |
| C | 0.777783  | -2.083489 | 2.715371  |
| C | 2.871049  | -2.500005 | 1.348394  |
| C | 1.426207  | 0.439884  | -0.924732 |
| C | 0.530487  | 0.772854  | -1.987433 |
| C | 0.845295  | 1.699627  | -2.944316 |
| C | 2.084525  | 2.384831  | -2.901063 |
| C | 2.982390  | 2.107610  | -1.820761 |
| C | 2.635298  | 1.122614  | -0.814049 |
| C | 3.629530  | 0.922672  | 0.295748  |
| C | 4.829571  | 0.179570  | 0.030209  |
| C | 5.822296  | 0.021149  | 1.053857  |
| C | 5.594199  | 0.622395  | 2.315762  |
| C | 4.448096  | 1.338756  | 2.555892  |
| C | 3.444743  | 1.508122  | 1.556449  |
| N | 2.255860  | 2.226656  | 1.866503  |
| C | 2.085422  | 3.536277  | 1.233268  |
| C | 1.856557  | 2.266990  | 3.266331  |
| H | 0.575143  | -4.087922 | 0.185618  |
| H | -1.033595 | -3.378547 | -0.043002 |
| H | 2.205725  | -1.771415 | -2.406881 |
| H | 2.579870  | -3.089994 | -1.303783 |
| H | 0.277793  | -2.986607 | 2.339579  |
| H | -0.016172 | -1.358218 | 2.938032  |
| H | 2.148190  | -0.586823 | 2.014270  |
| H | -0.441522 | 0.293544  | -2.034082 |
| H | 0.135115  | 1.927004  | -3.735600 |
| H | 4.309020  | 1.804335  | 3.525359  |
| H | 6.347175  | 0.519582  | 3.093954  |
| H | 2.466069  | -3.432966 | 0.937647  |
| H | 3.558448  | -2.093555 | 0.602683  |
| H | 2.681282  | 4.316658  | 1.740857  |
| H | 1.029966  | 3.824315  | 1.274220  |
| H | 2.384147  | 3.503663  | 0.187959  |
| H | 1.938189  | 1.274059  | 3.717319  |
| H | 0.806283  | 2.574825  | 3.318234  |
| H | 2.439804  | 2.980178  | 3.878184  |
| H | -0.216912 | -1.962034 | -1.847568 |
| C | 1.548625  | -2.430323 | 4.001089  |
| H | 1.944163  | -1.503826 | 4.444152  |
| H | 0.859163  | -2.860115 | 4.739083  |
| C | 3.641764  | -2.832363 | 2.640136  |
| H | 4.442643  | -3.548042 | 2.413727  |
| H | 4.131316  | -1.922090 | 3.012131  |
| C | 2.712292  | -3.393068 | 3.724377  |
| H | 3.273350  | -3.587100 | 4.647754  |
| H | 2.309040  | -4.361776 | 3.393314  |

|   |           |           |           |
|---|-----------|-----------|-----------|
| C | -0.392010 | -4.668025 | -1.659495 |
| H | -1.176824 | -4.260749 | -2.310968 |
| H | -0.799500 | -5.584181 | -1.212122 |
| C | 1.491910  | -3.714983 | -3.063522 |
| H | 2.411106  | -3.955920 | -3.613752 |
| H | 0.800086  | -3.265431 | -3.791632 |
| C | 0.860133  | -4.991431 | -2.488102 |
| H | 0.612255  | -5.690977 | -3.297301 |
| H | 1.597763  | -5.501578 | -1.850148 |
| C | 5.075880  | -0.444488 | -1.228691 |
| C | 6.997642  | -0.731537 | 0.787592  |
| C | 4.205036  | 2.840179  | -1.781532 |
| C | 2.436283  | 3.344044  | -3.887180 |
| C | 3.631957  | 4.022094  | -3.822042 |
| H | 3.892238  | 4.753483  | -4.582329 |
| C | 4.520654  | 3.766248  | -2.752785 |
| H | 5.462826  | 4.304728  | -2.694230 |
| C | 6.223173  | -1.172254 | -1.454418 |
| H | 6.381977  | -1.637086 | -2.423880 |
| C | 7.199899  | -1.318677 | -0.439835 |
| H | 8.101684  | -1.892993 | -0.633194 |
| H | 4.902012  | 2.664295  | -0.970880 |
| H | 1.734979  | 3.534166  | -4.696312 |
| H | 4.340670  | -0.342207 | -2.018554 |
| H | 7.735841  | -0.835770 | 1.579616  |
| H | -5.522190 | -0.635101 | 5.196208  |
| H | -5.328954 | 3.621386  | -1.716082 |
| H | -6.159867 | -1.784816 | 3.106273  |
| H | -3.572789 | 0.945872  | 5.169146  |
| C | -2.005117 | 2.914360  | 1.384001  |
| C | -3.746097 | 4.722344  | 0.174950  |
| C | -1.913254 | 4.263628  | 1.667129  |
| H | -1.133743 | 4.624747  | 2.333006  |
| C | -2.817008 | 5.177220  | 1.084004  |
| H | -2.753929 | 6.235511  | 1.323007  |
| H | -4.409363 | 5.419943  | -0.331383 |
| H | -1.264571 | 2.226163  | 1.779108  |
| H | -5.113836 | 1.307682  | -2.556166 |
| P | -3.500742 | -0.856129 | -1.957630 |
| O | -2.830433 | -2.126473 | -1.422985 |
| O | -5.003319 | -1.177579 | -2.662545 |
| O | -2.658142 | -0.166195 | -3.247127 |
| C | -5.387728 | -2.537200 | -2.912208 |
| H | -6.458601 | -2.608479 | -2.704593 |
| H | -5.204604 | -2.790874 | -3.963050 |
| H | -4.835280 | -3.229222 | -2.270850 |
| C | -2.424889 | -0.988041 | -4.398332 |
| H | -1.974458 | -1.947007 | -4.118966 |
| H | -3.359273 | -1.162777 | -4.944205 |

|   |           |           |           |
|---|-----------|-----------|-----------|
| H | -1.732405 | -0.433127 | -5.034850 |
| H | -2.395513 | 1.369776  | 3.095913  |
| C | -5.129047 | -1.704363 | 0.713994  |
| H | -5.952500 | -2.356927 | 1.021628  |
| H | -5.512425 | -1.046586 | -0.075803 |
| H | -4.344464 | -2.324579 | 0.274820  |

Sum of electronic and thermal Free Energies= -2474.352511

### TS13

|    |           |           |           |
|----|-----------|-----------|-----------|
| Pd | 1.281422  | 0.066179  | 0.299076  |
| P  | -0.955870 | -0.875894 | 0.867945  |
| C  | 3.319727  | -1.770422 | 0.742747  |
| C  | 3.943703  | -2.780747 | 1.467938  |
| C  | 4.412641  | -2.518215 | 2.753174  |
| C  | 4.218828  | -1.248118 | 3.284547  |
| C  | 3.563609  | -0.212313 | 2.591321  |
| C  | 3.102794  | -0.472146 | 1.268221  |
| C  | 3.119237  | 1.010190  | -0.002876 |
| C  | 3.063855  | 2.386663  | 0.485402  |
| C  | 4.016994  | 3.367826  | 0.044150  |
| C  | 4.984699  | 3.009430  | -0.926402 |
| C  | 4.913476  | 1.779999  | -1.531032 |
| C  | 3.969736  | 0.806745  | -1.112398 |
| C  | -0.898370 | -1.758933 | 2.597505  |
| C  | -0.042618 | -3.040105 | 2.551109  |
| C  | -2.234944 | -2.022114 | 3.316272  |
| C  | -1.688337 | -2.121948 | -0.415283 |
| C  | -0.550851 | -2.965629 | -1.031149 |
| C  | -2.853721 | -3.009601 | 0.053261  |
| C  | -2.149644 | 0.581670  | 1.173570  |
| C  | -2.028170 | 1.156023  | 2.476677  |
| C  | -2.748763 | 2.253812  | 2.867362  |
| C  | -3.645544 | 2.883093  | 1.969591  |
| C  | -3.748925 | 2.367562  | 0.638238  |
| C  | -2.975900 | 1.209196  | 0.240800  |
| C  | -3.112351 | 0.748478  | -1.182445 |
| C  | -4.306872 | 0.044033  | -1.560955 |
| C  | -4.472559 | -0.426813 | -2.905131 |
| C  | -3.433486 | -0.183193 | -3.835370 |
| C  | -2.303517 | 0.502677  | -3.467894 |
| C  | -2.116393 | 0.998126  | -2.141852 |
| N  | -0.913060 | 1.680511  | -1.817002 |
| C  | -1.026587 | 3.085024  | -1.407951 |
| C  | 0.213355  | 1.508293  | -2.731308 |
| H  | -0.559050 | -3.812631 | 1.966794  |
| H  | 0.913938  | -2.844655 | 2.055546  |
| H  | -2.846772 | -1.115212 | 3.356027  |
| H  | -2.815719 | -2.766662 | 2.761764  |



|   |           |           |           |
|---|-----------|-----------|-----------|
| H | -0.106009 | -3.616134 | -0.266070 |
| H | 0.253667  | -2.318464 | -1.396891 |
| H | -2.061910 | -1.467633 | -1.205727 |
| H | -1.338850 | 0.717710  | 3.188393  |
| H | -2.636142 | 2.652895  | 3.872806  |
| H | -1.539748 | 0.687101  | -4.213063 |
| H | -3.546282 | -0.536019 | -4.858011 |
| H | -2.515806 | -3.671560 | 0.860636  |
| H | -3.668829 | -2.397870 | 0.455359  |
| H | -1.174666 | 3.748145  | -2.278794 |
| H | -0.106077 | 3.383038  | -0.896893 |
| H | -1.857943 | 3.229633  | -0.723098 |
| H | 0.400176  | 0.449527  | -2.924596 |
| H | 1.103728  | 1.918336  | -2.247461 |
| H | 0.078368  | 2.039589  | -3.691850 |
| H | -0.324953 | -1.038025 | 3.195224  |
| C | -1.089217 | -3.835344 | -2.180920 |
| H | -1.425579 | -3.179324 | -2.997248 |
| H | -0.275076 | -4.448448 | -2.587905 |
| C | -3.379640 | -3.882064 | -1.102365 |
| H | -4.184832 | -4.531053 | -0.733360 |
| H | -3.826615 | -3.235027 | -1.868974 |
| C | -2.258519 | -4.722178 | -1.730399 |
| H | -2.647617 | -5.301879 | -2.577703 |
| H | -1.894871 | -5.453339 | -0.992304 |
| C | 0.204812  | -3.574623 | 3.974022  |
| H | 0.824001  | -2.851093 | 4.523844  |
| H | 0.786713  | -4.503643 | 3.921380  |
| C | -1.982778 | -2.546099 | 4.742628  |
| H | -2.941509 | -2.747721 | 5.237973  |
| H | -1.484458 | -1.763057 | 5.333735  |
| C | -1.109368 | -3.808984 | 4.733750  |
| H | -0.902747 | -4.137107 | 5.760678  |
| H | -1.665207 | -4.626427 | 4.250507  |
| C | -5.350871 | -0.244692 | -0.632015 |
| C | -5.653738 | -1.126669 | -3.271313 |
| C | -4.617589 | 3.049775  | -0.262941 |
| C | -4.412803 | 4.013866  | 2.354998  |
| C | -5.252896 | 4.636529  | 1.460467  |
| H | -5.836157 | 5.501542  | 1.764050  |
| C | -5.347721 | 4.148469  | 0.136642  |
| H | -6.003329 | 4.644191  | -0.574250 |
| C | -6.482739 | -0.930139 | -1.015437 |
| H | -7.261096 | -1.131389 | -0.284056 |
| C | -6.645045 | -1.373827 | -2.349885 |
| H | -7.545301 | -1.908822 | -2.639181 |
| H | -4.704380 | 2.695330  | -1.283161 |
| H | -4.318472 | 4.381190  | 3.374335  |
| H | -5.248660 | 0.085589  | 0.395305  |

|   |           |           |           |
|---|-----------|-----------|-----------|
| H | -5.756492 | -1.465884 | -4.299692 |
| H | 4.921516  | -3.283792 | 3.332998  |
| H | 5.578164  | 1.543485  | -2.355026 |
| H | 5.728215  | 3.738818  | -1.236751 |
| C | 2.011693  | 2.846406  | 1.329667  |
| C | 3.932152  | 4.702323  | 0.528601  |
| H | 4.681049  | 5.418643  | 0.198465  |
| H | 1.255845  | 2.130580  | 1.640478  |
| C | 2.905733  | 5.096340  | 1.355741  |
| H | 2.843706  | 6.125093  | 1.701146  |
| C | 1.920781  | 4.159150  | 1.741952  |
| H | 1.094791  | 4.469505  | 2.376111  |
| P | 3.893781  | -0.651840 | -2.224594 |
| O | 2.562526  | -1.398514 | -2.366688 |
| O | 5.228129  | -1.561834 | -1.813948 |
| O | 4.454630  | -0.089684 | -3.716655 |
| C | 5.478603  | -2.757038 | -2.571963 |
| H | 5.754843  | -2.509133 | -3.601896 |
| H | 6.311591  | -3.256853 | -2.073971 |
| H | 4.600369  | -3.411314 | -2.572835 |
| C | 3.486094  | 0.415649  | -4.643082 |
| H | 3.083776  | 1.379144  | -4.305110 |
| H | 4.016225  | 0.560023  | -5.587356 |
| H | 2.665735  | -0.294954 | -4.781874 |
| H | 4.581385  | -1.035698 | 4.287995  |
| H | 4.061681  | -3.764732 | 1.020704  |
| C | 3.428952  | 1.089893  | 3.347197  |
| H | 3.981261  | 1.905287  | 2.870157  |
| H | 2.389910  | 1.418178  | 3.437369  |
| H | 3.825656  | 0.971118  | 4.360580  |
| H | 2.953903  | -2.011411 | -0.246811 |

Sum of electronic and thermal Free Energies= -2474.353768

#### TS14

|    |           |           |           |
|----|-----------|-----------|-----------|
| Pd | 1.392883  | 0.000368  | 0.110970  |
| P  | -0.883343 | -0.776633 | 0.827615  |
| C  | 3.516551  | -1.044446 | 2.051181  |
| C  | 3.805224  | -1.193344 | 3.417611  |
| C  | 3.511370  | -0.213572 | 4.361185  |
| C  | 2.908433  | 0.967201  | 3.929922  |
| C  | 2.630995  | 1.147920  | 2.578802  |
| C  | 2.917317  | 0.168497  | 1.594362  |
| C  | 3.282932  | 0.847390  | -0.107061 |
| C  | 3.402813  | 2.309533  | -0.090579 |
| C  | 4.605700  | 2.954953  | -0.525207 |
| C  | 5.642124  | 2.175708  | -1.113486 |
| C  | 5.390270  | 0.866954  | -1.431746 |
| C  | 4.203414  | 0.216815  | -0.993377 |

|   |           |           |           |
|---|-----------|-----------|-----------|
| C | -0.760422 | -1.458242 | 2.642826  |
| C | 0.025372  | -2.782521 | 2.693735  |
| C | -2.056956 | -1.557563 | 3.467314  |
| C | -1.755281 | -2.121456 | -0.249942 |
| C | -0.705984 | -3.117626 | -0.791038 |
| C | -2.951145 | -2.866267 | 0.368860  |
| C | -1.977668 | 0.774491  | 1.042463  |
| C | -1.664293 | 1.510098  | 2.227545  |
| C | -2.277179 | 2.694214  | 2.542835  |
| C | -3.250922 | 3.253604  | 1.679841  |
| C | -3.552690 | 2.567853  | 0.460072  |
| C | -2.894493 | 1.318085  | 0.142116  |
| C | -3.239401 | 0.683101  | -1.174113 |
| C | -4.502138 | 0.014430  | -1.320659 |
| C | -4.848217 | -0.600476 | -2.569510 |
| C | -3.918524 | -0.535976 | -3.636589 |
| C | -2.721778 | 0.120387  | -3.489316 |
| C | -2.362310 | 0.755590  | -2.264561 |
| N | -1.106770 | 1.415689  | -2.148302 |
| C | -1.143802 | 2.878765  | -2.085999 |
| C | -0.038335 | 0.955058  | -3.026656 |
| H | -0.562006 | -3.587111 | 2.233086  |
| H | 0.954611  | -2.691309 | 2.121301  |
| H | -2.606716 | -0.611019 | 3.443534  |
| H | -2.719792 | -2.316705 | 3.037486  |
| H | -0.293089 | -3.713702 | 0.033212  |
| H | 0.138666  | -2.587194 | -1.241621 |
| H | -2.122080 | -1.551203 | -1.106714 |
| H | -0.907719 | 1.129676  | 2.903412  |
| H | -2.016950 | 3.217262  | 3.460205  |
| H | -2.039017 | 0.171126  | -4.329993 |
| H | -4.171546 | -1.002777 | -4.585843 |
| H | -2.613233 | -3.456122 | 1.230203  |
| H | -3.704239 | -2.160396 | 0.735143  |
| H | -1.347580 | 3.327806  | -3.075255 |
| H | -0.173298 | 3.245943  | -1.735980 |
| H | -1.909757 | 3.218989  | -1.391207 |
| H | 0.037823  | -0.134669 | -2.997013 |
| H | 0.906145  | 1.363712  | -2.654171 |
| H | -0.152977 | 1.283208  | -4.077220 |
| H | -0.112173 | -0.710252 | 3.116628  |
| C | -1.349083 | -4.067109 | -1.817104 |
| H | -1.672430 | -3.483378 | -2.691714 |
| H | -0.597908 | -4.781526 | -2.177746 |
| C | -3.587802 | -3.823203 | -0.657491 |
| H | -4.417723 | -4.366250 | -0.186457 |
| H | -4.024090 | -3.233933 | -1.474802 |
| C | -2.558475 | -4.808834 | -1.229160 |
| H | -3.025914 | -5.445338 | -1.991967 |

|   |           |           |           |
|---|-----------|-----------|-----------|
| H | -2.215985 | -5.481667 | -0.428264 |
| C | 0.341423  | -3.167809 | 4.150128  |
| H | 1.028295  | -2.421995 | 4.574364  |
| H | 0.871936  | -4.128792 | 4.170090  |
| C | -1.737337 | -1.939472 | 4.925483  |
| H | -2.669935 | -2.030053 | 5.497622  |
| H | -1.160673 | -1.127355 | 5.392894  |
| C | -0.930984 | -3.244484 | 5.006069  |
| H | -0.675401 | -3.469979 | 6.049543  |
| H | -1.557130 | -4.076905 | 4.651016  |
| C | -5.440376 | -0.089493 | -0.251394 |
| C | -6.098925 | -1.261552 | -2.707786 |
| C | -4.502930 | 3.173284  | -0.413837 |
| C | -3.906589 | 4.474504  | 1.989104  |
| C | -4.828406 | 5.021055  | 1.125809  |
| H | -5.325233 | 5.955759  | 1.370998  |
| C | -5.122066 | 4.361424  | -0.090098 |
| H | -5.843569 | 4.794998  | -0.777441 |
| C | -6.643463 | -0.739873 | -0.415745 |
| H | -7.339833 | -0.799375 | 0.416512  |
| C | -6.984204 | -1.329699 | -1.656959 |
| H | -7.938771 | -1.835221 | -1.773898 |
| H | -4.742720 | 2.687423  | -1.352254 |
| H | -3.660835 | 4.971776  | 2.924609  |
| H | -5.198036 | 0.357016  | 0.706423  |
| H | -6.341947 | -1.714786 | -3.666251 |
| H | 3.752734  | -0.369082 | 5.409406  |
| H | 6.097289  | 0.309043  | -2.038989 |
| H | 6.572901  | 2.653702  | -1.406577 |
| C | 2.313588  | 3.140985  | 0.281176  |
| C | 4.705895  | 4.369065  | -0.452981 |
| H | 5.635866  | 4.837728  | -0.766991 |
| H | 1.362100  | 2.669456  | 0.514718  |
| C | 3.638955  | 5.141109  | -0.045600 |
| H | 3.726739  | 6.223959  | -0.013612 |
| C | 2.419657  | 4.519964  | 0.296771  |
| H | 1.559497  | 5.124629  | 0.571648  |
| P | 3.770021  | -1.259162 | -1.974020 |
| O | 2.329801  | -1.781164 | -1.862173 |
| O | 4.995768  | -2.370682 | -1.746751 |
| O | 4.194893  | -0.859240 | -3.560901 |
| C | 4.946316  | -3.584370 | -2.516811 |
| H | 5.077396  | -3.370314 | -3.581796 |
| H | 5.772325  | -4.200288 | -2.155702 |
| H | 3.997350  | -4.106724 | -2.357017 |
| C | 3.286798  | -0.057283 | -4.320163 |
| H | 3.188184  | 0.945975  | -3.887077 |
| H | 3.718557  | 0.026183  | -5.320336 |
| H | 2.301153  | -0.529809 | -4.383395 |

|   |          |           |          |
|---|----------|-----------|----------|
| H | 2.199860 | 2.092652  | 2.284498 |
| H | 2.661328 | 1.755752  | 4.636598 |
| C | 3.870444 | -2.198854 | 1.155685 |
| H | 4.103327 | -3.088000 | 1.751272 |
| H | 3.060551 | -2.455373 | 0.467508 |
| H | 4.757909 | -1.974713 | 0.553700 |
| H | 4.268186 | -2.122660 | 3.742228 |

Sum of electronic and thermal Free Energies= -2474.352290

1. Cammidge, A. N.; Crepy, K. V. L. *Tetrahedron* **2004**, *60*, 4377.
2. Yin, J.; Buchwald, S. L. *J. Am. Chem. Soc.* **2000**, *122*, 12051
3. Still, W. C.; Kahn, M.; Mitra, A. *J. Org. Chem.* **1978**, *43*, 2923.
